# Supplementary material for: Tricarbonyl rhenium(i) complexes with 8-hydroxyquinolines: structural, chemical, antibacterial, and anticancer characteristics
Source: PubMed Central journal article supplement (PMC11152041; doi:10.1039/d4ra03141e), 2024-06-05
Supplement: RA-014-D4RA03141E-s001.pdf [file RA-014-D4RA03141E-s001.pdf]

## **Tricarbonyl rhenium(I) complexes with 8-hydroxyquinolines: structure, chemical, antibacterial, and anticancer characteristics**

Krzysztof Łyczko,<sup>1,\*</sup> Anna Pogorzelska,<sup>2</sup> Urszula Częścik,<sup>2</sup> Mirosława Koronkiewicz,<sup>2,\*</sup>

Joanna E. Rode,<sup>1\*</sup> Elżbieta Bednarek,<sup>2</sup> Robert Kawęcki,<sup>3</sup>

Karolina Węgrzyńska,<sup>2</sup> Anna Baraniak,<sup>2,\*</sup> Małgorzata Milczarek,<sup>2</sup> Jan Cz. Dobrowolski<sup>2,\*</sup>

<sup>1</sup> Institute of Nuclear Chemistry and Technology, Dorodna 16, 03-195 Warsaw, Poland

<sup>2</sup> National Medicines Institute, Chełmska 30/34, 00-725 Warsaw, Poland

<sup>3</sup> Faculty of Science, University of Siedlce, 3 Maja 54, 08-110 Siedlce, Poland

## **Electronic supplementary information (ESI)**

## Table of contents

**Table S1.** Crystallographic data and structure refinement parameters for studied complexes.

**Table S2.** Crystallographic data and structure refinement parameters for the methanol solvates of the studied tricarbonyl rhenium(I) complexes.

**Fig. S1.** Molecular structures of the methanol solvates of the studied tricarbonyl rhenium(I) complexes.

**Tables S3-S15.** Comparison of the selected experimental and calculated geometrical parameters of complexes **1–12**.

**Fig. S2.** Overlay of the scXRD and calculated molecular structures of Re(I) complexes.

**Fig. S3.** Molecular structure of  $[\text{Re}(\text{CO})_3(\text{ClQ})\text{MeHim}]\cdot\text{CH}_3\text{CN}$  (**10**·**CH<sub>3</sub>CN**) complex.

**Table S16.** Geometric parameters associated with intermolecular N–H···O hydrogen bond for studied rhenium(I) complexes.

**Figs S4-S15.** Fragments of the crystal structure of complexes **1–12** showing selected intermolecular interactions.

**Table S17.** The shortest contacts between centroids of the adjacent five- and six-membered rings in the crystal structure of studied complexes.

**Figs S16-S30.** Experimental and calculated FTIR spectra of ligands and their Re(I) complexes.

**Figs S31-S33.** Experimental and calculated UV-Vis spectra of ligands and their Re(I) complexes.

**Table S18.** The selected experimental and TD-DFT calculated absorptions of Re(I) complexes.

**Tables S19-S30.** Calculated transitions (with a contribution greater than 5%) for complexes **1–12**.

**Table S31.** Calculated compositions of HOMO and LUMO orbitals.

**Fig. S34.** <sup>1</sup>H NMR spectra showing exchange of pyrazole ligand with DMSO and H<sub>2</sub>O in **3**.

**Fig. S35.** <sup>1</sup>H NMR spectra showing exchange of pyrazole ligand with DMSO in **8**.

**Fig. S36.** Structures of Re(I) complexes considered in the BSSE calculations.

**Fig. S37.** Scheme of the calculation of interaction energies corrected for BSSE.

**Table S32.** Energetics obtained in the calculations of interaction energies corrected for BSSE.

**Figure S38.** Atom labeling in tricarbonyl rhenium(I) complexes for NMR assignment.

**Figs S39-S50.** <sup>1</sup>H and <sup>13</sup>C NMR spectra of complexes **1–12**.

**Table S1.** Crystallographic data and structure refinement parameters for the studied tricarbonyl rhenium(I) complexes.

| Compound                                                                             | <b>1</b>                                                         | <b>2</b>                                                         | <b>3</b>                                                         | <b>4·0.5CH<sub>3</sub>CN</b>                                         | <b>5</b>                                                         | <b>6</b>                                                         |
|--------------------------------------------------------------------------------------|------------------------------------------------------------------|------------------------------------------------------------------|------------------------------------------------------------------|----------------------------------------------------------------------|------------------------------------------------------------------|------------------------------------------------------------------|
| Chemical formula                                                                     | C <sub>15</sub> H <sub>10</sub> N <sub>3</sub> O <sub>4</sub> Re | C <sub>16</sub> H <sub>12</sub> N <sub>3</sub> O <sub>4</sub> Re | C <sub>17</sub> H <sub>14</sub> N <sub>3</sub> O <sub>4</sub> Re | C <sub>22</sub> H <sub>15.5</sub> N <sub>3.5</sub> O <sub>4</sub> Re | C <sub>16</sub> H <sub>12</sub> N <sub>3</sub> O <sub>4</sub> Re | C <sub>17</sub> H <sub>14</sub> N <sub>3</sub> O <sub>4</sub> Re |
| Formula weight                                                                       | 482.46                                                           | 496.49                                                           | 510.51                                                           | 579.08                                                               | 496.49                                                           | 510.51                                                           |
| $\lambda$ (Mo/Cu K $\alpha$ ) (Å)                                                    | 0.71073                                                          | 1.54184                                                          | 0.71073                                                          | 1.54184                                                              | 1.54184                                                          | 1.54184                                                          |
| Crystal system                                                                       | triclinic                                                        | monoclinic                                                       | monoclinic                                                       | monoclinic                                                           | triclinic                                                        | monoclinic                                                       |
| Space group                                                                          | <i>P</i> $\bar{1}$                                               | <i>P</i> 2 <sub>1</sub> / <i>c</i>                               | <i>P</i> 2 <sub>1</sub> / <i>n</i>                               | <i>C</i> 2/ <i>c</i>                                                 | <i>P</i> $\bar{1}$                                               | <i>P</i> 2 <sub>1</sub> / <i>c</i>                               |
| <i>a</i> (Å)                                                                         | 7.44080(10)                                                      | 13.03930(10)                                                     | 8.1183(2)                                                        | 10.26090(10)                                                         | 7.37137(15)                                                      | 7.23554(4)                                                       |
| <i>b</i> (Å)                                                                         | 8.1893(2)                                                        | 9.47380(10)                                                      | 20.2662(4)                                                       | 17.4450(2)                                                           | 8.22667(18)                                                      | 17.95049(11)                                                     |
| <i>c</i> (Å)                                                                         | 12.2524(3)                                                       | 14.18770(10)                                                     | 10.2281(2)                                                       | 23.0438(3)                                                           | 12.8439(4)                                                       | 12.33498(10)                                                     |
| $\alpha$ (°)                                                                         | 87.694(2)                                                        | 90                                                               | 90                                                               | 90                                                                   | 104.939(2)                                                       | 90                                                               |
| $\beta$ (°)                                                                          | 82.047(2)                                                        | 115.3400(10)                                                     | 95.549(2)                                                        | 93.5550(10)                                                          | 94.720(2)                                                        | 93.2445(6)                                                       |
| $\gamma$ (°)                                                                         | 85.253(2)                                                        | 90                                                               | 90                                                               | 90                                                                   | 93.3929(17)                                                      | 90                                                               |
| Volume (Å <sup>3</sup> )                                                             | 736.57(3)                                                        | 1584.00(3)                                                       | 1674.92(6)                                                       | 4116.94(8)                                                           | 747.38(3)                                                        | 1599.517(19)                                                     |
| <i>Z</i>                                                                             | 2                                                                | 4                                                                | 4                                                                | 8                                                                    | 2                                                                | 4                                                                |
| <i>D</i> <sub>calc</sub> (g·cm <sup>-3</sup> )                                       | 2.175                                                            | 2.082                                                            | 2.025                                                            | 1.869                                                                | 2.206                                                            | 2.120                                                            |
| $\mu$ (mm <sup>-1</sup> )                                                            | 8.273                                                            | 15.248                                                           | 7.282                                                            | 11.855                                                               | 16.158                                                           | 15.123                                                           |
| <i>F</i> (000)                                                                       | 456                                                              | 944                                                              | 976                                                              | 2232                                                                 | 472                                                              | 976                                                              |
| Crystal size (mm)                                                                    | 0.10 x 0.06 x 0.04                                               | 0.10 x 0.08 x 0.04                                               | 0.18 x 0.12 x 0.06                                               | 0.10 x 0.05 x 0.03                                                   | 0.10 x 0.06 x 0.02                                               | 0.15 x 0.05 x 0.03                                               |
| $\theta$ range (°)                                                                   | 2.497–31.913                                                     | 3.751–71.000                                                     | 2.010–31.392                                                     | 3.844–69.875                                                         | 3.580–70.541                                                     | 4.354–70.632                                                     |
| Reflections collected                                                                | 29580                                                            | 48018                                                            | 19122                                                            | 21389                                                                | 19126                                                            | 53161                                                            |
| Unique reflections                                                                   | 4824                                                             | 3034                                                             | 5186                                                             | 3848                                                                 | 2824                                                             | 3063                                                             |
| Reflections <i>I</i> > 2 $\sigma$ ( <i>I</i> )                                       | 4556                                                             | 2793                                                             | 4529                                                             | 3468                                                                 | 2735                                                             | 2961                                                             |
| <i>R</i> <sub>int</sub>                                                              | 0.0366                                                           | 0.0303                                                           | 0.0379                                                           | 0.0495                                                               | 0.0361                                                           | 0.0326                                                           |
| Restraints/parameters                                                                | 0 / 212                                                          | 0 / 222                                                          | 0 / 232                                                          | 0 / 282                                                              | 0 / 222                                                          | 0 / 233                                                          |
| Goodness-of-fit                                                                      | 1.077                                                            | 1.047                                                            | 1.083                                                            | 1.036                                                                | 1.051                                                            | 1.064                                                            |
| <i>R</i> <sub>1</sub> , <i>wR</i> <sub>2</sub> ( <i>I</i> > 2 $\sigma$ ( <i>I</i> )) | 0.0166, 0.0317                                                   | 0.0182, 0.0424                                                   | 0.0258, 0.0488                                                   | 0.0251, 0.0600                                                       | 0.0159, 0.0389                                                   | 0.0126, 0.0300                                                   |
| <i>R</i> <sub>1</sub> , <i>wR</i> <sub>2</sub> (all data)                            | 0.0189, 0.0324                                                   | 0.0212, 0.0441                                                   | 0.0332, 0.0520                                                   | 0.0294, 0.0626                                                       | 0.0167, 0.0394                                                   | 0.0134, 0.0303                                                   |
| Max. peak/hole (e <sup>-</sup> ·Å <sup>-3</sup> )                                    | 1.002/−0.805                                                     | 1.257/−1.022                                                     | 1.195/−1.614                                                     | 1.142/−1.631                                                         | 0.810/−1.041                                                     | 0.395/−0.527                                                     |

**Table S1. Continued.**

| Compound                                                                             | <b>7</b>                                                         | <b>8</b>                                                         | <b>9</b>                                                          | <b>10·CH<sub>3</sub>CN</b>                                         | <b>11</b>                                                          | <b>12</b>                                                          |
|--------------------------------------------------------------------------------------|------------------------------------------------------------------|------------------------------------------------------------------|-------------------------------------------------------------------|--------------------------------------------------------------------|--------------------------------------------------------------------|--------------------------------------------------------------------|
| Chemical formula                                                                     | C <sub>18</sub> H <sub>16</sub> N <sub>3</sub> O <sub>4</sub> Re | C <sub>22</sub> H <sub>16</sub> N <sub>3</sub> O <sub>4</sub> Re | C <sub>15</sub> H <sub>9</sub> ClN <sub>3</sub> O <sub>4</sub> Re | C <sub>18</sub> H <sub>14</sub> ClN <sub>4</sub> O <sub>4</sub> Re | C <sub>17</sub> H <sub>13</sub> ClN <sub>3</sub> O <sub>4</sub> Re | C <sub>21</sub> H <sub>13</sub> ClN <sub>3</sub> O <sub>4</sub> Re |
| Formula weight                                                                       | 524.54                                                           | 572.58                                                           | 516.90                                                            | 571.98                                                             | 544.95                                                             | 592.99                                                             |
| $\lambda$ (Mo/Cu K $\alpha$ ) (Å)                                                    | 0.71073                                                          | 1.54184                                                          | 0.71073                                                           | 1.54184                                                            | 1.54184                                                            | 1.54184                                                            |
| Crystal system                                                                       | monoclinic                                                       | triclinic                                                        | triclinic                                                         | monoclinic                                                         | monoclinic                                                         | triclinic                                                          |
| Space group                                                                          | <i>P</i> 2 <sub>1</sub> / <i>c</i>                               | <i>P</i> $\bar{1}$                                               | <i>P</i> $\bar{1}$                                                | <i>P</i> 2 <sub>1</sub> / <i>c</i>                                 | <i>P</i> 2 <sub>1</sub> / <i>n</i>                                 | <i>P</i> $\bar{1}$                                                 |
| <i>a</i> (Å)                                                                         | 11.5721(3)                                                       | 7.8950(2)                                                        | 7.5357(3)                                                         | 14.2506(3)                                                         | 7.96094(6)                                                         | 9.8714(6)                                                          |
| <i>b</i> (Å)                                                                         | 15.9025(5)                                                       | 10.3914(4)                                                       | 8.1793(3)                                                         | 15.7017(3)                                                         | 19.9948(2)                                                         | 10.2322(6)                                                         |
| <i>c</i> (Å)                                                                         | 9.6875(3)                                                        | 12.3893(3)                                                       | 12.8369(6)                                                        | 18.1171(4)                                                         | 11.14750(11)                                                       | 11.4613(6)                                                         |
| $\alpha$ (°)                                                                         | 90                                                               | 79.872(3)                                                        | 85.268(3)                                                         | 90                                                                 | 90                                                                 | 67.014(5)                                                          |
| $\beta$ (°)                                                                          | 106.476(3)                                                       | 84.527(2)                                                        | 78.455(4)                                                         | 111.310(3)                                                         | 95.6676(8)                                                         | 75.785(5)                                                          |
| $\gamma$ (°)                                                                         | 90                                                               | 83.437(3)                                                        | 84.500(3)                                                         | 90                                                                 | 90                                                                 | 65.454(6)                                                          |
| Volume (Å <sup>3</sup> )                                                             | 1709.55(9)                                                       | 991.08(5)                                                        | 770.02(6)                                                         | 3776.68(15)                                                        | 1765.75(3)                                                         | 964.62(11)                                                         |
| <i>Z</i>                                                                             | 4                                                                | 2                                                                | 2                                                                 | 8                                                                  | 4                                                                  | 2                                                                  |
| <i>D</i> <sub>calc</sub> (g·cm <sup>-3</sup> )                                       | 2.038                                                            | 1.919                                                            | 2.229                                                             | 2.012                                                              | 2.050                                                              | 2.042                                                              |
| $\mu$ (mm <sup>-1</sup> )                                                            | 7.138                                                            | 12.294                                                           | 8.089                                                             | 14.187                                                             | 15.112                                                             | 13.906                                                             |
| <i>F</i> (000)                                                                       | 1008                                                             | 552                                                              | 488                                                               | 2192                                                               | 1040                                                               | 568                                                                |
| Crystal size (mm)                                                                    | 0.08 x 0.06 x 0.05                                               | 0.20 x 0.10 x 0.04                                               | 0.12 x 0.04 x 0.03                                                | 0.14 x 0.05 x 0.04                                                 | 0.06 x 0.04 x 0.03                                                 | 0.08 x 0.05 x 0.03                                                 |
| $\theta$ range (°)                                                                   | 1.835–28.000                                                     | 3.635–70.699                                                     | 2.507–27.999                                                      | 3.329–70.918                                                       | 4.423–70.398                                                       | 4.211–70.843                                                       |
| Reflections collected                                                                | 24923                                                            | 14084                                                            | 17146                                                             | 17396                                                              | 34082                                                              | 13414                                                              |
| Unique reflections                                                                   | 4120                                                             | 3747                                                             | 3705                                                              | 7149                                                               | 3359                                                               | 3660                                                               |
| Reflections <i>I</i> > 2 $\sigma$ ( <i>I</i> )                                       | 3734                                                             | 3668                                                             | 3507                                                              | 6326                                                               | 3054                                                               | 3345                                                               |
| <i>R</i> <sub>int</sub>                                                              | 0.0403                                                           | 0.0389                                                           | 0.0388                                                            | 0.0298                                                             | 0.0380                                                             | 0.0478                                                             |
| Restraints/parameters                                                                | 0 / 242                                                          | 0 / 276                                                          | 0 / 221                                                           | 1 / 531                                                            | 0 / 241                                                            | 0 / 275                                                            |
| Goodness-of-fit                                                                      | 1.087                                                            | 1.087                                                            | 1.044                                                             | 1.035                                                              | 1.054                                                              | 1.035                                                              |
| <i>R</i> <sub>1</sub> , <i>wR</i> <sub>2</sub> ( <i>I</i> > 2 $\sigma$ ( <i>I</i> )) | 0.0177, 0.0371                                                   | 0.0218, 0.0549                                                   | 0.0182, 0.0410                                                    | 0.0276, 0.0680                                                     | 0.0217, 0.0431                                                     | 0.0289, 0.0635                                                     |
| <i>R</i> <sub>1</sub> , <i>wR</i> <sub>2</sub> (all data)                            | 0.0215, 0.0386                                                   | 0.0224, 0.0552                                                   | 0.0202, 0.0418                                                    | 0.0336, 0.0714                                                     | 0.0253, 0.0444                                                     | 0.0365, 0.0659                                                     |
| Max. peak/hole (e <sup>-</sup> ·Å <sup>-3</sup> )                                    | 0.622/-0.851                                                     | 1.139/-1.122                                                     | 1.218/-0.786                                                      | 1.453/-0.985                                                       | 0.623/-1.148                                                       | 1.697/-1.388                                                       |

**Table S2.** Crystallographic data and structure refinement parameters for the methanol solvates of the studied tricarbonyl rhenium(I) complexes.

| Compound                                                                             | <b>1·MeOH</b>                                                    | <b>4·MeOH</b>                                                    | <b>[Re(CO)<sub>3</sub>(ClQ)MeOH]·MeOH</b>            |
|--------------------------------------------------------------------------------------|------------------------------------------------------------------|------------------------------------------------------------------|------------------------------------------------------|
| Chemical formula                                                                     | C <sub>16</sub> H <sub>14</sub> N <sub>3</sub> O <sub>5</sub> Re | C <sub>22</sub> H <sub>18</sub> N <sub>3</sub> O <sub>5</sub> Re | C <sub>14</sub> H <sub>13</sub> ClNO <sub>6</sub> Re |
| Formula weight                                                                       | 514.50                                                           | 590.59                                                           | 512.90                                               |
| $\lambda$ (Mo/Cu K $\alpha$ ) (Å)                                                    | 0.71073                                                          | 1.54184                                                          | 1.54184                                              |
| Crystal system                                                                       | triclinic                                                        | triclinic                                                        | monoclinic                                           |
| Space group                                                                          | <i>P</i> $\bar{1}$                                               | <i>P</i> $\bar{1}$                                               | <i>P</i> 2 <sub>1</sub> /c                           |
| <i>a</i> (Å)                                                                         | 8.1187(2)                                                        | 7.4449(2)                                                        | 6.45743(12)                                          |
| <i>b</i> (Å)                                                                         | 9.2533(3)                                                        | 9.4022(4)                                                        | 15.9593(3)                                           |
| <i>c</i> (Å)                                                                         | 11.8350(4)                                                       | 16.3685(7)                                                       | 15.6659(2)                                           |
| $\alpha$ (°)                                                                         | 92.174(3)                                                        | 74.151(4)                                                        | 90                                                   |
| $\beta$ (°)                                                                          | 102.111(3)                                                       | 77.427(3)                                                        | 100.5214(16)                                         |
| $\gamma$ (°)                                                                         | 92.651(2)                                                        | 72.802(3)                                                        | 90                                                   |
| Volume (Å <sup>3</sup> )                                                             | 867.35(5)                                                        | 1041.18(7)                                                       | 1587.32(5)                                           |
| <i>Z</i>                                                                             | 2                                                                | 2                                                                | 4                                                    |
| <i>D</i> <sub>calc</sub> (g·cm <sup>-3</sup> )                                       | 1.970                                                            | 1.884                                                            | 2.146                                                |
| $\mu$ (mm <sup>-1</sup> )                                                            | 7.036                                                            | 11.761                                                           | 16.809                                               |
| <i>F</i> (000)                                                                       | 492                                                              | 572                                                              | 976                                                  |
| Crystal size (mm)                                                                    | 0.15 x 0.10 x 0.03                                               | 0.20 x 0.12 x 0.10                                               | 0.08 x 0.05 x 0.03                                   |
| $\theta$ range (°)                                                                   | 2.206–28.000                                                     | 2.838–70.398                                                     | 3.989–70.295                                         |
| Reflections collected                                                                | 9447                                                             | 7486                                                             | 12.984                                               |
| Unique reflections                                                                   | 4178                                                             | 3879                                                             | 2.986                                                |
| Reflections <i>I</i> > 2 $\sigma$ ( <i>I</i> )                                       | 3914                                                             | 3794                                                             | 2.698                                                |
| <i>R</i> <sub>int</sub>                                                              | 0.0360                                                           | 0.0276                                                           | 0.0285                                               |
| Restraints/parameters                                                                | 0 / 235                                                          | 3 / 289                                                          | 1 / 218                                              |
| Goodness-of-fit                                                                      | 1.013                                                            | 1.104                                                            | 1.032                                                |
| <i>R</i> <sub>1</sub> , <i>wR</i> <sub>2</sub> ( <i>I</i> > 2 $\sigma$ ( <i>I</i> )) | 0.0247, 0.0450                                                   | 0.0246, 0.0637                                                   | 0.0192, 0.0427                                       |
| <i>R</i> <sub>1</sub> , <i>wR</i> <sub>2</sub> (all data)                            | 0.0274, 0.0463                                                   | 0.0253, 0.0641                                                   | 0.0254, 0.0442                                       |
| Max. peak/hole(e <sup>-</sup> ·Å <sup>-3</sup> )                                     | 1.040/-1.375                                                     | 1.344/-1.749                                                     | 0.802/-0.675                                         |

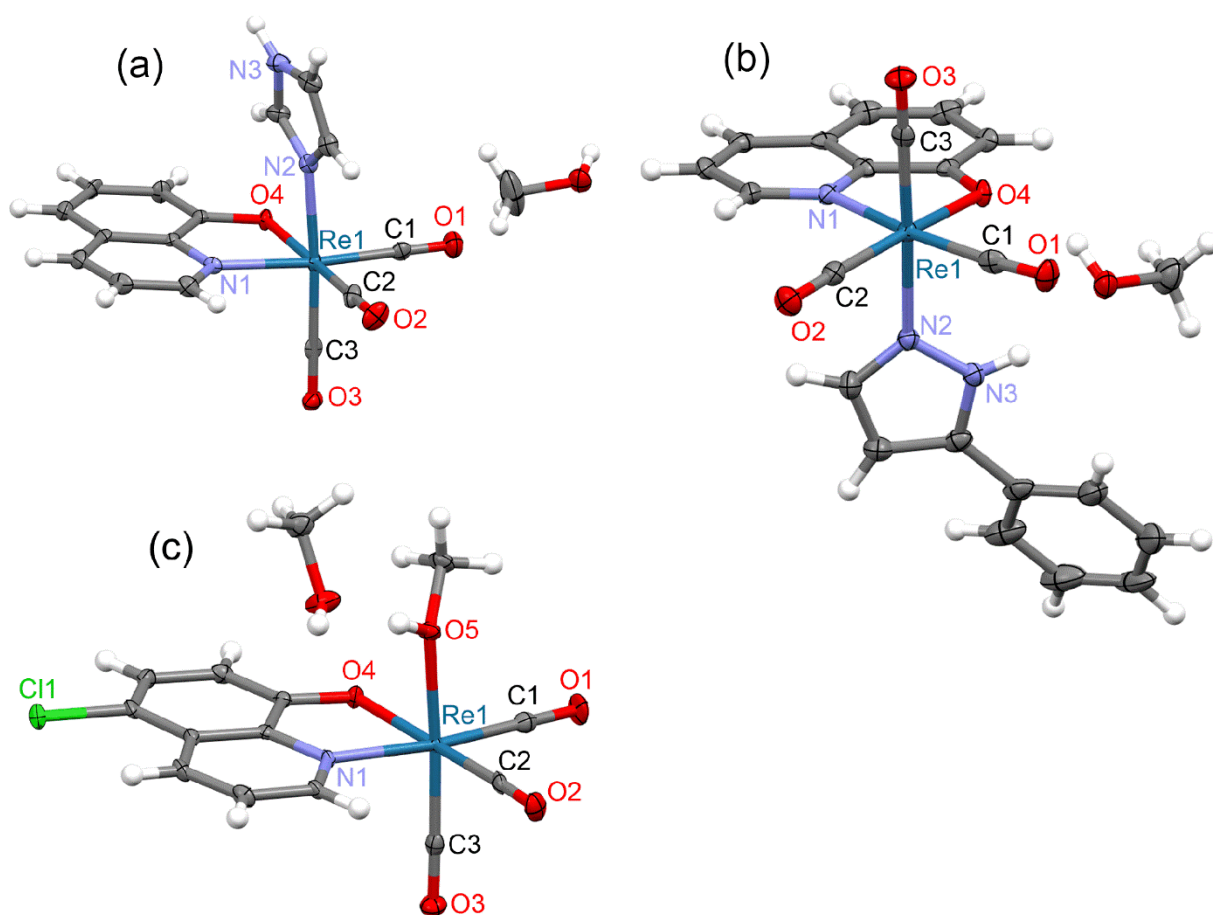

**Fig. S1.** Molecular structures of rhenium(I) complexes: a)  $[\text{Re}(\text{CO})_3(\text{Q})\text{Him}] \cdot \text{MeOH}$  (**1·MeOH**), b)  $[\text{Re}(\text{CO})_3(\text{Q})\text{HPhpz}] \cdot \text{MeOH}$  (**4·MeOH**), and c)  $[\text{Re}(\text{CO})_3(\text{Cl})\text{Q}]\text{MeOH} \cdot \text{MeOH}$ . Thermal ellipsoids are plotted at a 50% probability level.

**Table S3.** Comparison of the experimentally obtained and calculated bond lengths and angles for complex **1** (MAD means the Mean Absolute Deviation).

| Complex 1     | Exp    | PBE0<br>LANL2DZ/6-31G(d,p) |              | PBE0<br>def2-TZVP |              | B3LYP<br>LANL2DZ/6-31G(d,p) |              | B3LYP<br>def2-TZVP |              |
|---------------|--------|----------------------------|--------------|-------------------|--------------|-----------------------------|--------------|--------------------|--------------|
|               |        | Calc                       | Exp-Calc     | Calc              | Exp-Calc     | Calc                        | Exp-Calc     | Calc               | Exp-Calc     |
| Re1-C1        | 1.920  | 1.921                      | 0.001        | 1.923             | 0.003        | 1.932                       | 0.012        | 1.938              | 0.018        |
| Re1-C2        | 1.909  | 1.899                      | 0.010        | 1.902             | 0.007        | 1.913                       | 0.004        | 1.918              | 0.009        |
| Re1-C3        | 1.912  | 1.916                      | 0.004        | 1.918             | 0.006        | 1.927                       | 0.015        | 1.933              | 0.021        |
| Re1-N1        | 2.176  | 2.184                      | 0.007        | 2.194             | 0.018        | 2.215                       | 0.039        | 2.223              | 0.047        |
| Re1-O4        | 2.126  | 2.127                      | 0.001        | 2.120             | 0.006        | 2.145                       | 0.019        | 2.139              | 0.013        |
| Re1-N2        | 2.199  | 2.210                      | 0.011        | 2.222             | 0.023        | 2.247                       | 0.048        | 2.255              | 0.056        |
| C11-O4        | 1.304  | 1.336                      | 0.032        | 1.299             | 0.005        | 1.311                       | 0.007        | 1.306              | 0.002        |
| <b>MAD</b>    |        |                            | <b>0.009</b> |                   | <b>0.009</b> |                             | <b>0.020</b> |                    | <b>0.023</b> |
| N1-Re1-O4     | 76.78  | 76.40                      | 0.38         | 75.83             | 0.95         | 75.96                       | 0.82         | 75.40              | 1.38         |
| N1-Re1-N2     | 84.81  | 84.81                      | 0.00         | 85.33             | 0.52         | 85.39                       | 0.58         | 85.73              | 0.92         |
| O4-Re1-N2     | 81.92  | 81.81                      | 0.11         | 81.99             | 0.07         | 81.95                       | 0.03         | 82.07              | 0.15         |
| N1-Re1-C1     | 173.40 | 171.82                     | 1.58         | 173.16            | 0.24         | 171.4                       | 2.00         | 172.24             | 1.16         |
| O4-Re1-C2     | 171.99 | 171.25                     | 0.74         | 172.25            | 0.26         | 170.69                      | 1.30         | 171.77             | 0.22         |
| N2-Re1-C3     | 177.13 | 175.82                     | 1.31         | 177.85            | 0.72         | 175.94                      | 1.19         | 177.37             | 0.24         |
| C1-Re1-C2     | 88.70  | 90.99                      | 2.29         | 88.81             | 0.11         | 91.48                       | 2.78         | 89.68              | 0.98         |
| C1-Re1-C3     | 88.75  | 90.55                      | 1.80         | 88.70             | 0.05         | 90.84                       | 2.09         | 89.44              | 0.69         |
| C2-Re1-C3     | 89.68  | 90.96                      | 1.28         | 88.57             | 1.11         | 91.38                       | 1.70         | 89.40              | 0.28         |
| N2-Re1-C1     | 93.73  | 91.77                      | 1.96         | 92.48             | 1.25         | 91.25                       | 2.48         | 91.81              | 1.92         |
| N2-Re1-C2     | 91.82  | 92.48                      | 0.66         | 93.24             | 1.42         | 92.05                       | 0.23         | 92.92              | 1.10         |
| O1-C1-Re1     | 178.95 | 179.05                     | 0.10         | 179.74            | 0.79         | 178.7                       | 0.25         | 179.43             | 0.48         |
| O2-C2-Re2     | 177.08 | 175.58                     | 1.50         | 177.32            | 0.24         | 175.25                      | 1.83         | 176.89             | 0.19         |
| O3-C3-Re3     | 179.44 | 179.70                     | 0.26         | 178.92            | 0.52         | 179.52                      | 0.08         | 179.53             | 0.09         |
| <b>MAD</b>    |        |                            | <b>1.00</b>  |                   | <b>0.59</b>  |                             | <b>1.24</b>  |                    | <b>0.70</b>  |
| N1-Re1-N2-C13 | 85.13  | 88.10                      | 2.97         | 90.00             | 4.87         | 89.28                       | 4.15         | 89.69              | 4.56         |
| N1-Re1-N2-C15 | -92.73 | -93.37                     | 0.64         | -92.78            | 0.05         | -92.96                      | 0.23         | -93.61             | 0.88         |
| <b>MAD</b>    |        |                            | <b>1.81</b>  |                   | <b>2.46</b>  |                             | <b>2.19</b>  |                    | <b>2.72</b>  |

**Table S4.** Comparison of the experimentally obtained and calculated bond lengths and angles for complex **2** (MAD means the Mean Absolute Deviation).

| Complex 2     | Exp     | PBE0<br>LANL2DZ/6-31G(d,p) |              | PBE0<br>def2-TZVP |              | B3LYP<br>LANL2DZ/6-31G(d,p) |              | B3LYP<br>def2-TZVP |              |
|---------------|---------|----------------------------|--------------|-------------------|--------------|-----------------------------|--------------|--------------------|--------------|
|               |         | Calc                       | Exp-Calc     | Calc              | Exp-Calc     | Calc                        | Exp-Calc     | Calc               | Exp-Calc     |
| Re1-C1        | 1.922   | 1.916                      | 0.006        | 1.918             | 0.004        | 1.927                       | 0.005        | 1.933              | 0.011        |
| Re1-C2        | 1.910   | 1.904                      | 0.006        | 1.906             | 0.004        | 1.917                       | 0.007        | 1.923              | 0.013        |
| Re1-C3        | 1.920   | 1.916                      | 0.004        | 1.918             | 0.002        | 1.926                       | 0.006        | 1.932              | 0.012        |
| Re1-N1        | 2.172   | 2.184                      | 0.012        | 2.194             | 0.022        | 2.215                       | 0.043        | 2.224              | 0.052        |
| Re1-O4        | 2.125   | 2.133                      | 0.008        | 2.125             | 0.000        | 2.151                       | 0.026        | 2.145              | 0.020        |
| Re1-N2        | 2.189   | 2.218                      | 0.029        | 2.229             | 0.040        | 2.258                       | 0.069        | 2.265              | 0.076        |
| C11-O4        | 1.331   | 1.303                      | 0.028        | 1.298             | 0.033        | 1.310                       | 0.021        | 1.305              | 0.026        |
| <b>MAD</b>    |         |                            | <b>0.013</b> |                   | <b>0.015</b> |                             | <b>0.025</b> |                    | <b>0.030</b> |
| N1-Re1-O4     | 76.64   | 76.30                      | 0.34         | 75.74             | 0.90         | 75.88                       | 0.76         | 75.30              | 1.34         |
| N1-Re1-N2     | 83.00   | 83.68                      | 0.68         | 84.41             | 1.41         | 84.28                       | 1.28         | 84.87              | 1.87         |
| O4-Re1-N2     | 83.76   | 82.41                      | 1.35         | 82.50             | 1.26         | 82.68                       | 1.08         | 82.72              | 1.04         |
| N1-Re1-C1     | 173.49  | 172.45                     | 1.04         | 173.78            | 0.29         | 171.95                      | 1.54         | 172.90             | 0.59         |
| O4-Re1-C2     | 170.11  | 171.48                     | 1.37         | 172.36            | 2.25         | 171.04                      | 0.93         | 171.90             | 1.79         |
| N2-Re1-C3     | 176.71  | 175.41                     | 1.30         | 177.38            | 0.67         | 175.62                      | 1.09         | 177.06             | 0.35         |
| C1-Re1-C2     | 91.36   | 90.45                      | 0.91         | 88.31             | 3.05         | 90.97                       | 0.39         | 89.13              | 2.23         |
| C1-Re1-C3     | 87.39   | 90.29                      | 2.90         | 88.39             | 1.00         | 90.65                       | 3.26         | 89.12              | 1.73         |
| C2-Re1-C3     | 90.82   | 90.67                      | 0.15         | 88.44             | 2.38         | 91.03                       | 0.21         | 89.25              | 1.57         |
| N2-Re1-C1     | 95.77   | 93.10                      | 2.67         | 93.83             | 1.94         | 92.48                       | 3.29         | 93.21              | 2.56         |
| N2-Re1-C2     | 90.01   | 92.38                      | 2.37         | 93.01             | 3.00         | 91.97                       | 1.96         | 92.57              | 2.56         |
| O1-C1-Re1     | 177.18  | 179.03                     | 1.85         | 179.57            | 2.39         | 178.60                      | 1.42         | 179.53             | 2.35         |
| O2-C2-Re2     | 174.96  | 176.26                     | 1.30         | 177.68            | 2.72         | 175.93                      | 0.97         | 177.29             | 2.33         |
| O3-C3-Re3     | 178.47  | 179.66                     | 1.19         | 178.99            | 0.52         | 179.46                      | 0.99         | 179.56             | 1.09         |
| <b>MAD</b>    |         |                            | <b>1.39</b>  |                   | <b>1.70</b>  |                             | <b>1.37</b>  |                    | <b>1.67</b>  |
| N1-Re1-N2-C13 | -128.09 | -125.17                    | 2.92         | -126.42           | 1.67         | -123.88                     | 4.21         | -124.54            | 3.55         |
| N1-Re1-N2-C15 | 43.37   | 53.94                      | 10.57        | 54.16             | 10.79        | 55.69                       | 12.32        | 56.23              | 12.86        |
| <b>MAD</b>    |         |                            | <b>7.44</b>  |                   | <b>7.08</b>  |                             | <b>8.95</b>  |                    | <b>9.04</b>  |



**Table S5.** Comparison of the experimentally obtained and calculated bond lengths and angles for complex **3** (MAD means the Mean Absolute Deviation).

| Complex 3     | Exp    | PBE0<br>LANL2DZ/6-31G(d,p) |              | PBE0<br>def2-TZVP |              | B3LYP<br>LANL2DZ/6-31G(d,p) |              | B3LYP<br>def2-TZVP |              |
|---------------|--------|----------------------------|--------------|-------------------|--------------|-----------------------------|--------------|--------------------|--------------|
|               |        | Calc                       | Exp-Calc     | Calc              | Exp-Calc     | Calc                        | Exp-Calc     | Calc               | Exp-Calc     |
| Re1-C1        | 1.922  | 1.920                      | 0.002        | 1.922             | 0.000        | 1.932                       | 0.010        | 1.937              | 0.015        |
| Re1-C2        | 1.907  | 1.900                      | 0.007        | 1.903             | 0.004        | 1.913                       | 0.006        | 1.919              | 0.012        |
| Re1-C3        | 1.921  | 1.915                      | 0.006        | 1.917             | 0.004        | 1.925                       | 0.004        | 1.931              | 0.010        |
| Re1-N1        | 2.171  | 2.185                      | 0.014        | 2.195             | 0.024        | 2.216                       | 0.045        | 2.225              | 0.054        |
| Re1-O4        | 2.138  | 2.153                      | 0.015        | 2.144             | 0.006        | 2.173                       | 0.035        | 2.164              | 0.027        |
| Re1-N2        | 2.203  | 2.214                      | 0.011        | 2.226             | 0.023        | 2.252                       | 0.049        | 2.261              | 0.058        |
| C11-O4        | 1.333  | 1.315                      | 0.018        | 1.309             | 0.024        | 1.323                       | 0.010        | 1.315              | 0.018        |
| <b>MAD</b>    |        |                            | <b>0.011</b> |                   | <b>0.012</b> |                             | <b>0.023</b> |                    | <b>0.028</b> |
| N1-Re1-O4     | 76.62  | 76.20                      | 0.42         | 75.63             | 0.99         | 75.73                       | 0.89         | 75.17              | 1.45         |
| N1-Re1-N2     | 84.10  | 86.21                      | 2.11         | 85.66             | 1.56         | 86.79                       | 2.69         | 87.05              | 2.95         |
| O4-Re1-N2     | 80.98  | 79.84                      | 1.14         | 79.88             | 1.10         | 79.84                       | 1.14         | 79.96              | 1.02         |
| N1-Re1-C1     | 176.30 | 172.26                     | 4.04         | 173.37            | 2.93         | 171.85                      | 4.45         | 172.48             | 3.82         |
| O4-Re1-C2     | 173.37 | 172.44                     | 0.93         | 173.25            | 0.12         | 171.73                      | 1.64         | 172.67             | 0.70         |
| N2-Re1-C3     | 175.36 | 173.58                     | 1.78         | 175.19            | 0.17         | 173.58                      | 1.78         | 174.77             | 0.59         |
| C1-Re1-C2     | 85.70  | 90.47                      | 4.77         | 88.47             | 2.77         | 90.98                       | 5.28         | 89.34              | 3.64         |
| C1-Re1-C3     | 87.78  | 90.39                      | 2.61         | 88.55             | 0.77         | 90.67                       | 2.89         | 89.28              | 1.50         |
| C2-Re1-C3     | 86.85  | 89.65                      | 2.80         | 87.39             | 0.54         | 90.15                       | 3.30         | 88.25              | 1.40         |
| N2-Re1-C1     | 92.86  | 90.80                      | 2.06         | 91.67             | 1.19         | 90.32                       | 2.54         | 91.01              | 1.85         |
| N2-Re1-C2     | 97.78  | 96.65                      | 1.13         | 97.42             | 0.36         | 96.18                       | 1.60         | 96.98              | 0.80         |
| O1-C1-Re1     | 176.35 | 179.08                     | 2.08         | 179.45            | 2.45         | 178.74                      | 1.74         | 179.26             | 2.26         |
| O2-C2-Re2     | 177.00 | 177.00                     | 1.30         | 177.70            | 0.60         | 176.73                      | 1.57         | 177.56             | 0.74         |
| O3-C3-Re3     | 178.30 | 179.51                     | 1.21         | 179.17            | 0.87         | 179.28                      | 0.98         | 179.63             | 1.33         |
| <b>MAD</b>    |        |                            | <b>2.03</b>  |                   | <b>1.17</b>  |                             | <b>2.32</b>  |                    | <b>1.72</b>  |
| N1-Re1-N2-C13 | 93.24  | 90.68                      | 2.56         | 92.87             | 0.37         | 92.86                       | 0.38         | 94.04              | 0.80         |
| N1-Re1-N2-C15 | -93.31 | -95.22                     | 1.91         | -94.06            | 0.75         | -94.09                      | 0.78         | -93.58             | 0.27         |
| <b>MAD</b>    |        |                            | <b>2.23</b>  |                   | <b>0.56</b>  |                             | <b>0.58</b>  |                    | <b>0.54</b>  |

**Table S6.** Comparison of the experimentally obtained and calculated bond lengths and angles for complex **4** (MAD means the Mean Absolute Deviation).

| Complex 4     | Exp     | PBE0<br>LANL2DZ/6-31G(d,p) |              | PBE0<br>def2-TZVP |              | B3LYP<br>LANL2DZ/6-31G(d,p) |              | B3LYP<br>def2-TZVP |              |
|---------------|---------|----------------------------|--------------|-------------------|--------------|-----------------------------|--------------|--------------------|--------------|
|               |         | Calc                       | Exp-Calc     | Calc              | Exp-Calc     | Calc                        | Exp-Calc     | Calc               | Exp-Calc     |
| Re1-C1        | 1.936   | 1.921                      | 0.015        | 1.923             | 0.013        | 1.932                       | 0.004        | 1.938              | 0.002        |
| Re1-C2        | 1.893   | 1.901                      | 0.008        | 1.904             | 0.011        | 1.914                       | 0.021        | 1.920              | 0.027        |
| Re1-C3        | 1.925   | 1.917                      | 0.008        | 1.919             | 0.006        | 1.928                       | 0.003        | 1.934              | 0.009        |
| Re1-N1        | 2.170   | 2.185                      | 0.015        | 2.194             | 0.024        | 2.216                       | 0.046        | 2.224              | 0.054        |
| Re1-O4        | 2.130   | 2.151                      | 0.021        | 2.142             | 0.012        | 2.171                       | 0.041        | 2.162              | 0.032        |
| Re1-N2        | 2.199   | 2.197                      | 0.002        | 2.208             | 0.009        | 2.230                       | 0.031        | 2.238              | 0.039        |
| C11-O4        | 1.335   | 1.317                      | 0.018        | 1.310             | 0.025        | 1.324                       | 0.011        | 1.317              | 0.018        |
| <b>MAD</b>    |         |                            | <b>0.012</b> |                   | <b>0.014</b> |                             | <b>0.022</b> |                    | <b>0.026</b> |
| N1-Re1-O4     | 76.75   | 76.18                      | 0.57         | 75.66             | 1.09         | 75.74                       | 1.01         | 75.22              | 1.53         |
| N1-Re1-N2     | 85.43   | 86.46                      | 1.03         | 86.77             | 1.34         | 86.84                       | 1.41         | 87.01              | 1.58         |
| O4-Re1-N2     | 83.19   | 79.91                      | 3.28         | 79.93             | 3.26         | 79.84                       | 3.35         | 79.97              | 3.22         |
| N1-Re1-C1     | 174.98  | 172.25                     | 2.73         | 173.28            | 1.70         | 171.81                      | 3.17         | 172.40             | 2.58         |
| O4-Re1-C2     | 171.06  | 170.69                     | 0.37         | 171.58            | 0.52         | 170.12                      | 0.94         | 171.07             | 0.01         |
| N2-Re1-C3     | 178.59  | 175.24                     | 3.35         | 176.97            | 1.62         | 175.12                      | 3.47         | 176.45             | 2.14         |
| C1-Re1-C2     | 89.96   | 90.70                      | 0.74         | 88.68             | 1.28         | 91.18                       | 1.22         | 89.53              | 0.43         |
| C1-Re1-C3     | 85.64   | 90.31                      | 4.67         | 88.52             | 2.88         | 90.60                       | 4.96         | 89.24              | 3.60         |
| C2-Re1-C3     | 87.37   | 90.81                      | 3.44         | 88.66             | 1.29         | 91.20                       | 3.83         | 89.46              | 2.09         |
| N2-Re1-C1     | 96.68   | 91.28                      | 5.40         | 92.10             | 4.58         | 90.88                       | 5.80         | 91.52              | 5.16         |
| N2-Re1-C2     | 93.13   | 93.65                      | 0.52         | 94.32             | 1.19         | 93.43                       | 0.30         | 94.01              | 0.88         |
| O1-C1-Re1     | 174.62  | 179.00                     | 4.38         | 179.33            | 4.71         | 178.68                      | 4.06         | 179.16             | 4.54         |
| O2-C2-Re2     | 176.25  | 176.39                     | 0.14         | 177.75            | 1.50         | 176.07                      | 0.18         | 177.35             | 1.10         |
| O3-C3-Re3     | 175.26  | 179.77                     | 4.51         | 179.14            | 3.88         | 179.48                      | 4.22         | 179.67             | 4.41         |
| <b>MAD</b>    |         |                            | <b>2.51</b>  |                   | <b>2.20</b>  |                             | <b>2.71</b>  |                    | <b>2.38</b>  |
| N1-Re1-N2-C13 | 21.72   | 91.65                      | 69.93        | 93.38             | 71.66        | 92.35                       | 70.63        | 93.44              | 71.72        |
| N1-Re1-N2-C15 | -163.08 | -92.32                     | 70.76        | -91.47            | 71.61        | -92.03                      | 71.05        | -91.73             | 71.35        |
| <b>MAD</b>    |         |                            | <b>70.35</b> |                   | <b>71.64</b> |                             | <b>70.84</b> |                    | <b>71.54</b> |

**Table S7.** Comparison of the experimentally obtained and calculated bond lengths and angles for complex **5** (MAD means the Mean Absolute Deviation).

| Complex 5     | Exp     | PBE0<br>LANL2DZ/6-31G(d,p) |              | PBE0<br>def2-TZVP |              | B3LYP<br>LANL2DZ/6-31G(d,p) |              | B3LYP<br>def2-TZVP |              |
|---------------|---------|----------------------------|--------------|-------------------|--------------|-----------------------------|--------------|--------------------|--------------|
|               |         | Calc                       | Exp-Calc     | Calc              | Exp-Calc     | Calc                        | Exp-Calc     | Calc               | Exp-Calc     |
| Re1-C1        | 1.920   | 1.913                      | 0.007        | 1.915             | 0.005        | 1.924                       | 0.004        | 1.930              | 0.010        |
| Re1-C2        | 1.923   | 1.901                      | 0.022        | 1.903             | 0.020        | 1.914                       | 0.009        | 1.919              | 0.004        |
| Re1-C3        | 1.906   | 1.915                      | 0.009        | 1.917             | 0.011        | 1.925                       | 0.019        | 1.931              | 0.025        |
| Re1-N1        | 2.213   | 2.236                      | 0.023        | 2.245             | 0.032        | 2.276                       | 0.063        | 2.283              | 0.070        |
| Re1-O4        | 2.116   | 2.113                      | 0.003        | 2.106             | 0.010        | 2.129                       | 0.013        | 2.123              | 0.007        |
| Re1-N2        | 2.192   | 2.214                      | 0.022        | 2.226             | 0.034        | 2.251                       | 0.059        | 2.260              | 0.068        |
| C11-O4        | 1.332   | 1.304                      | 0.028        | 1.299             | 0.033        | 1.311                       | 0.021        | 1.306              | 0.026        |
| <b>MAD</b>    |         |                            | <b>0.016</b> |                   | <b>0.021</b> |                             | <b>0.027</b> |                    | <b>0.030</b> |
| N1-Re1-O4     | 76.70   | 76.40                      | 0.30         | 75.85             | 0.85         | 75.91                       | 0.79         | 75.37              | 1.33         |
| N1-Re1-N2     | 85.11   | 85.27                      | 0.16         | 85.57             | 0.46         | 85.96                       | 0.85         | 86.07              | 0.96         |
| O4-Re1-N2     | 81.83   | 81.66                      | 0.17         | 81.90             | 0.07         | 81.85                       | 0.02         | 81.98              | 0.15         |
| N1-Re1-C1     | 169.22  | 168.89                     | 0.33         | 170.38            | 1.16         | 168.58                      | 0.64         | 169.59             | 0.37         |
| O4-Re1-C2     | 174.25  | 173.32                     | 0.93         | 174.48            | 0.23         | 172.94                      | 1.31         | 174.14             | 0.11         |
| N2-Re1-C3     | 174.77  | 176.13                     | 1.36         | 178.13            | 3.36         | 176.27                      | 1.50         | 177.67             | 2.90         |
| C1-Re1-C2     | 87.96   | 88.55                      | 0.59         | 86.51             | 1.45         | 89.14                       | 1.18         | 87.46              | 0.50         |
| C1-Re1-C3     | 91.31   | 90.62                      | 0.69         | 88.71             | 2.60         | 90.89                       | 0.42         | 89.44              | 1.87         |
| C2-Re1-C3     | 89.07   | 91.15                      | 2.08         | 88.62             | 0.45         | 91.55                       | 2.48         | 89.46              | 0.39         |
| N2-Re1-C1     | 93.75   | 92.05                      | 1.70         | 92.75             | 1.00         | 91.56                       | 2.19         | 92.09              | 1.66         |
| N2-Re1-C2     | 92.43   | 91.71                      | 0.72         | 92.65             | 0.22         | 91.3                        | 1.13         | 92.36              | 0.07         |
| O1-C1-Re1     | 178.28  | 178.60                     | 0.32         | 179.48            | 1.20         | 178.31                      | 0.03         | 179.14             | 0.86         |
| O2-C2-Re2     | 178.92  | 176.90                     | 2.02         | 178.19            | 0.73         | 176.64                      | 2.28         | 178.13             | 0.79         |
| O3-C3-Re3     | 178.21  | 179.40                     | 1.19         | 178.79            | 0.58         | 179.42                      | 1.21         | 179.35             | 1.14         |
| <b>MAD</b>    |         |                            | <b>0.90</b>  |                   | <b>1.03</b>  |                             | <b>1.15</b>  |                    | <b>0.94</b>  |
| N1-Re1-N2-C13 | 75.67   | 91.49                      | 15.82        | 94.42             | 18.75        | 93.25                       | 17.58        | 94.18              | 18.51        |
| N1-Re1-N2-C15 | -102.37 | -90.24                     | 12.13        | -88.49            | 13.88        | -89.16                      | 13.21        | -89.27             | 13.10        |
| <b>MAD</b>    |         |                            | <b>13.98</b> |                   | <b>16.32</b> |                             | <b>15.40</b> |                    | <b>15.81</b> |

**Table S8.** Comparison of the experimentally obtained and calculated bond lengths and angles for complex **6** (MAD means the Mean Absolute Deviation).

| Complex 6     | Exp    | PBE0<br>LANL2DZ/6-31G(d,p) |              | PBE0<br>def2-TZVP |              | B3LYP<br>LANL2DZ/6-31G(d,p) |              | B3LYP<br>def2-TZVP |              |
|---------------|--------|----------------------------|--------------|-------------------|--------------|-----------------------------|--------------|--------------------|--------------|
|               |        | Calc                       | Exp-Calc     | Calc              | Exp-Calc     | Calc                        | Exp-Calc     | Calc               | Exp-Calc     |
| Re1-C1        | 1.904  | 1.908                      | 0.004        | 1.910             | 0.006        | 1.918                       | 0.014        | 1.925              | 0.021        |
| Re1-C2        | 1.914  | 1.902                      | 0.012        | 1.905             | 0.009        | 1.915                       | 0.001        | 1.920              | 0.006        |
| Re1-C3        | 1.921  | 1.916                      | 0.005        | 1.917             | 0.004        | 1.925                       | 0.004        | 1.931              | 0.010        |
| Re1-N1        | 2.225  | 2.242                      | 0.017        | 2.249             | 0.024        | 2.282                       | 0.057        | 2.288              | 0.063        |
| Re1-O4        | 2.133  | 2.115                      | 0.017        | 2.107             | 0.025        | 2.129                       | 0.003        | 2.124              | 0.008        |
| Re1-N2        | 2.204  | 2.222                      | 0.018        | 2.236             | 0.032        | 2.264                       | 0.060        | 2.275              | 0.071        |
| C11-O4        | 1.330  | 1.301                      | 0.029        | 1.297             | 0.033        | 1.308                       | 0.022        | 1.304              | 0.026        |
| <b>MAD</b>    |        |                            | <b>0.015</b> |                   | <b>0.019</b> |                             | <b>0.023</b> |                    | <b>0.029</b> |
| N1-Re1-O4     | 76.30  | 75.95                      | 0.35         | 75.51             | 0.79         | 75.52                       | 0.78         | 75.03              | 1.27         |
| N1-Re1-N2     | 87.43  | 86.47                      | 0.96         | 86.61             | 0.82         | 86.99                       | 0.44         | 87.10              | 0.33         |
| O4-Re1-N2     | 81.18  | 82.80                      | 1.62         | 82.64             | 1.46         | 82.89                       | 1.71         | 82.80              | 1.62         |
| N1-Re1-C1     | 170.42 | 168.86                     | 1.56         | 170.13            | 0.29         | 168.65                      | 1.77         | 169.43             | 0.99         |
| O4-Re1-C2     | 174.79 | 176.45                     | 1.66         | 177.22            | 2.43         | 175.66                      | 0.87         | 176.52             | 1.73         |
| N2-Re1-C3     | 177.22 | 175.37                     | 1.85         | 177.20            | 0.02         | 175.58                      | 1.64         | 176.88             | 0.34         |
| C1-Re1-C2     | 85.78  | 88.87                      | 3.09         | 86.96             | 1.18         | 89.43                       | 3.65         | 87.95              | 2.17         |
| C1-Re1-C3     | 83.60  | 90.30                      | 6.70         | 88.20             | 4.60         | 90.70                       | 7.10         | 89.01              | 5.41         |
| C2-Re1-C3     | 88.94  | 89.80                      | 0.86         | 82.27             | 6.67         | 90.25                       | 1.31         | 88.11              | 0.83         |
| N2-Re1-C1     | 97.21  | 92.32                      | 4.89         | 93.48             | 3.73         | 91.60                       | 5.61         | 92.64              | 4.57         |
| N2-Re1-C2     | 93.77  | 94.07                      | 0.30         | 95.04             | 1.27         | 93.55                       | 0.22         | 94.59              | 0.82         |
| O1-C1-Re1     | 174.52 | 178.76                     | 4.24         | 179.38            | 4.86         | 178.48                      | 3.96         | 179.18             | 4.66         |
| O2-C2-Re2     | 178.19 | 179.40                     | 1.21         | 178.80            | 0.61         | 179.27                      | 1.08         | 179.40             | 1.21         |
| O3-C3-Re3     | 176.85 | 179.70                     | 2.85         | 178.68            | 1.83         | 179.65                      | 2.80         | 179.22             | 2.37         |
| <b>MAD</b>    |        |                            | <b>2.30</b>  |                   | <b>2.18</b>  |                             | <b>2.35</b>  |                    | <b>2.02</b>  |
| N1-Re1-N2-C13 | 164.75 | 140.97                     | 23.78        | 139.45            | 25.30        | 140.50                      | 24.25        | 138.66             | 26.09        |
| N1-Re1-N2-C15 | -28.49 | -42.04                     | 13.55        | -43.02            | 14.53        | -42.85                      | 14.36        | -44.21             | 15.72        |
| <b>MAD</b>    |        |                            | <b>18.67</b> |                   | <b>19.92</b> |                             | <b>19.31</b> |                    | <b>20.91</b> |

**Table S9.** Comparison of the experimentally obtained and calculated bond lengths and angles for complex **7** (MAD means the Mean Absolute Deviation).

| Complex 7     | Exp    | PBE0<br>LANL2DZ/6-31G(d,p) |              | PBE0<br>def2-TZVP |              | B3LYP<br>LANL2DZ/6-31G(d,p) |              | B3LYP<br>def2-TZVP |              |
|---------------|--------|----------------------------|--------------|-------------------|--------------|-----------------------------|--------------|--------------------|--------------|
|               |        | Calc                       | Exp-Calc     | Calc              | Exp-Calc     | Calc                        | Exp-Calc     | Calc               | Exp-Calc     |
| Re1-C1        | 1.912  | 1.913                      | 0.001        | 1.914             | 0.002        | 1.924                       | 0.012        | 1.929              | 0.017        |
| Re1-C2        | 1.913  | 1.902                      | 0.011        | 1.905             | 0.008        | 1.915                       | 0.002        | 1.921              | 0.008        |
| Re1-C3        | 1.906  | 1.913                      | 0.007        | 1.915             | 0.009        | 1.924                       | 0.018        | 1.930              | 0.024        |
| Re1-N1        | 2.226  | 2.237                      | 0.011        | 2.248             | 0.022        | 2.277                       | 0.051        | 2.286              | 0.060        |
| Re1-O4        | 2.122  | 2.139                      | 0.017        | 2.130             | 0.008        | 2.157                       | 0.035        | 2.148              | 0.026        |
| Re1-N2        | 2.226  | 2.223                      | 0.003        | 2.233             | 0.007        | 2.277                       | 0.051        | 2.268              | 0.042        |
| C11-O4        | 1.335  | 1.315                      | 0.020        | 1.309             | 0.026        | 1.323                       | 0.012        | 1.316              | 0.019        |
| <b>MAD</b>    |        |                            | <b>0.010</b> |                   | <b>0.012</b> |                             | <b>0.026</b> |                    | <b>0.028</b> |
| N1-Re1-O4     | 76.99  | 76.20                      | 0.79         | 75.60             | 1.39         | 75.68                       | 1.31         | 75.08              | 1.91         |
| N1-Re1-N2     | 86.66  | 87.36                      | 0.70         | 87.82             | 1.16         | 87.88                       | 1.22         | 88.10              | 1.44         |
| O4-Re1-N2     | 81.21  | 79.58                      | 1.63         | 79.75             | 1.46         | 79.72                       | 1.49         | 79.87              | 1.34         |
| N1-Re1-C1     | 168.56 | 169.18                     | 0.62         | 170.43            | 1.87         | 168.85                      | 0.29         | 169.66             | 1.10         |
| O4-Re1-C2     | 177.36 | 175.56                     | 1.80         | 176.49            | 0.87         | 175.11                      | 2.25         | 175.98             | 1.38         |
| N2-Re1-C3     | 177.53 | 174.11                     | 3.42         | 175.71            | 1.82         | 174.05                      | 3.48         | 172.25             | 5.28         |
| C1-Re1-C2     | 87.53  | 87.99                      | 0.46         | 86.19             | 1.34         | 88.61                       | 1.08         | 87.16              | 0.37         |
| C1-Re1-C3     | 85.62  | 90.46                      | 4.84         | 88.54             | 2.92         | 90.72                       | 5.10         | 89.26              | 3.64         |
| C2-Re1-C3     | 86.15  | 89.76                      | 3.61         | 87.39             | 1.24         | 90.17                       | 4.02         | 88.23              | 2.08         |
| N2-Re1-C1     | 95.15  | 90.58                      | 4.57         | 91.46             | 3.69         | 90.26                       | 4.89         | 90.93              | 4.22         |
| N2-Re1-C2     | 96.22  | 96.08                      | 0.14         | 96.89             | 0.67         | 95.72                       | 0.50         | 96.51              | 0.29         |
| O1-C1-Re1     | 174.21 | 178.54                     | 4.33         | 179.06            | 4.85         | 178.28                      | 4.07         | 178.91             | 4.70         |
| O2-C2-Re2     | 176.52 | 179.18                     | 2.66         | 178.26            | 1.74         | 179.54                      | 3.02         | 178.81             | 2.29         |
| O3-C3-Re3     | 177.25 | 179.72                     | 2.47         | 179.04            | 1.79         | 179.45                      | 2.20         | 179.57             | 2.32         |
| <b>MAD</b>    |        |                            | <b>2.29</b>  |                   | <b>1.92</b>  |                             | <b>2.49</b>  |                    | <b>2.31</b>  |
| N1-Re1-N2-C13 | -89.07 | -92.68                     | 3.61         | -96.74            | 7.67         | -95.32                      | 6.25         | -97.64             | 8.57         |
| N1-Re1-N2-C15 | 92.17  | 94.73                      | 2.56         | 91.21             | 0.96         | 92.55                       | 0.38         | 90.53              | 1.64         |
| <b>MAD</b>    |        |                            | <b>2.67</b>  |                   | <b>2.38</b>  |                             | <b>2.86</b>  |                    | <b>2.87</b>  |

**Table S10.** Comparison of the experimentally obtained and calculated bond lengths and angles for complex **8** (MAD means the Mean Absolute Deviation).

| Complex 8     | Exp    | PBE0<br>LANL2DZ/6-31G(d,p) |              | PBE0<br>def2-TZVP |              | B3LYP<br>LANL2DZ/6-31G(d,p) |              | B3LYP<br>def2-TZVP |              |
|---------------|--------|----------------------------|--------------|-------------------|--------------|-----------------------------|--------------|--------------------|--------------|
|               |        | Calc                       | Exp-Calc     | Calc              | Exp-Calc     | Calc                        | Exp-Calc     | Calc               | Exp-Calc     |
| Re1-C1        | 1.900  | 1.913                      | 0.013        | 1.915             | 0.015        | 1.924                       | 0.024        | 1.930              | 0.030        |
| Re1-C2        | 1.918  | 1.902                      | 0.016        | 1.904             | 0.014        | 1.915                       | 0.003        | 1.921              | 0.003        |
| Re1-C3        | 1.922  | 1.916                      | 0.006        | 1.918             | 0.004        | 1.927                       | 0.005        | 1.932              | 0.010        |
| Re1-N1        | 2.215  | 2.240                      | 0.025        | 2.247             | 0.032        | 2.280                       | 0.065        | 2.285              | 0.070        |
| Re1-O4        | 2.105  | 2.139                      | 0.034        | 2.129             | 0.024        | 2.156                       | 0.051        | 2.147              | 0.042        |
| Re1-N2        | 2.189  | 2.198                      | 0.009        | 2.209             | 0.020        | 2.231                       | 0.042        | 2.240              | 0.051        |
| C11-O4        | 1.336  | 1.315                      | 0.021        | 1.309             | 0.027        | 1.322                       | 0.014        | 1.316              | 0.020        |
| <b>MAD</b>    |        |                            | <b>0.018</b> |                   | <b>0.019</b> |                             | <b>0.029</b> |                    | <b>0.032</b> |
| N1-Re1-O4     | 77.05  | 76.03                      | 1.02         | 75.56             | 1.49         | 75.54                       | 1.51         | 75.07              | 1.98         |
| N1-Re1-N2     | 82.22  | 86.31                      | 4.09         | 86.76             | 4.54         | 86.86                       | 4.64         | 87.24              | 5.02         |
| O4-Re1-N2     | 81.51  | 80.09                      | 1.42         | 80.02             | 1.49         | 80.00                       | 1.51         | 80.07              | 1.44         |
| N1-Re1-C1     | 169.36 | 168.92                     | 0.44         | 170.24            | 0.88         | 168.63                      | 0.73         | 169.50             | 0.14         |
| O4-Re1-C2     | 174.22 | 173.01                     | 1.21         | 173.78            | 0.44         | 172.56                      | 1.66         | 173.42             | 0.80         |
| N2-Re1-C3     | 175.55 | 175.45                     | 0.10         | 177.31            | 1.76         | 175.38                      | 0.17         | 176.80             | 1.25         |
| C1-Re1-C2     | 87.45  | 88.21                      | 0.76         | 86.34             | 1.11         | 88.83                       | 1.38         | 87.29              | 0.16         |
| C1-Re1-C3     | 89.04  | 90.34                      | 1.30         | 88.48             | 0.56         | 90.62                       | 1.58         | 89.20              | 0.16         |
| C2-Re1-C3     | 87.59  | 90.92                      | 3.33         | 88.66             | 1.07         | 91.31                       | 3.72         | 89.44              | 1.85         |
| N2-Re1-C1     | 95.41  | 92.13                      | 3.28         | 92.73             | 2.68         | 91.64                       | 3.77         | 92.07              | 3.34         |
| N2-Re1-C2     | 92.75  | 92.98                      | 0.23         | 93.81             | 1.06         | 92.77                       | 0.02         | 93.55              | 0.80         |
| O1-C1-Re1     | 178.02 | 178.51                     | 0.49         | 179.08            | 1.06         | 178.28                      | 0.26         | 178.87             | 0.85         |
| O2-C2-Re2     | 178.22 | 177.84                     | 0.38         | 178.41            | 0.19         | 177.72                      | 0.50         | 178.50             | 0.28         |
| O3-C3-Re3     | 177.61 | 179.61                     | 2.00         | 179.05            | 1.44         | 179.45                      | 1.84         | 179.61             | 2.00         |
| <b>MAD</b>    |        |                            | <b>1.43</b>  |                   | <b>1.41</b>  |                             | <b>1.66</b>  |                    | <b>1.43</b>  |
| N1-Re1-N2-C13 | 80.06  | 97.96                      | 17.90        | 99.12             | 19.06        | 99.25                       | 19.19        | 99.84              | 19.78        |
| N1-Re1-N2-C15 | -83.94 | -85.05                     | 1.11         | -85.59            | 1.65         | -84.96                      | 1.02         | -85.96             | 2.02         |
| <b>MAD</b>    |        |                            | <b>9.51</b>  |                   | <b>10.36</b> |                             | <b>10.11</b> |                    | <b>10.90</b> |

**Table S11.** Comparison of the experimentally obtained and calculated bond lengths and angles for complex **9** (MAD means the Mean Absolute Deviation).

| Complex 9     | Exp    | PBE0<br>LANL2DZ/6-31G(d,p) |              | PBE0<br>def2-TZVP |              | B3LYP<br>LANL2DZ/6-31G(d,p) |              | B3LYP<br>def2-TZVP |              |
|---------------|--------|----------------------------|--------------|-------------------|--------------|-----------------------------|--------------|--------------------|--------------|
|               |        | Calc                       | Exp-Calc     | Calc              | Exp-Calc     | Calc                        | Exp-Calc     | Calc               | Exp-Calc     |
| Re1-C1        | 1.913  | 1.921                      | 0.008        | 1.922             | 0.009        | 1.932                       | 0.019        | 1.938              | 0.025        |
| Re1-C2        | 1.903  | 1.899                      | 0.004        | 1.902             | 0.001        | 1.912                       | 0.009        | 1.918              | 0.015        |
| Re1-C3        | 1.908  | 1.917                      | 0.009        | 1.919             | 0.011        | 1.928                       | 0.020        | 1.934              | 0.026        |
| Re1-N1        | 2.194  | 2.186                      | 0.008        | 2.195             | 0.001        | 2.217                       | 0.023        | 2.225              | 0.031        |
| Re1-O4        | 2.128  | 2.128                      | 0.000        | 2.120             | 0.008        | 2.146                       | 0.018        | 2.140              | 0.012        |
| Re1-N2        | 2.197  | 2.21                       | 0.013        | 2.221             | 0.024        | 2.246                       | 0.049        | 2.254              | 0.057        |
| C11-O4        | 1.330  | 1.302                      | 0.028        | 1.298             | 0.032        | 1.309                       | 0.021        | 1.304              | 0.026        |
| <b>MAD</b>    |        |                            | <b>0.010</b> |                   | <b>0.012</b> |                             | <b>0.023</b> |                    | <b>0.027</b> |
| N1-Re1-O4     | 76.47  | 76.25                      | 0.22         | 75.71             | 0.76         | 75.79                       | 0.68         | 75.25              | 1.22         |
| N1-Re1-N2     | 85.12  | 84.80                      | 0.32         | 85.33             | 0.21         | 85.38                       | 0.26         | 85.73              | 0.61         |
| O4-Re1-N2     | 82.73  | 81.86                      | 0.87         | 82.03             | 0.70         | 82.00                       | 0.73         | 82.11              | 0.62         |
| N1-Re1-C1     | 173.98 | 171.84                     | 2.14         | 173.16            | 0.82         | 171.40                      | 2.58         | 172.24             | 1.74         |
| O4-Re1-C2     | 171.73 | 171.24                     | 0.49         | 172.22            | 0.49         | 170.68                      | 1.05         | 171.73             | 0.00         |
| N2-Re1-C3     | 176.34 | 175.83                     | 0.51         | 177.85            | 1.51         | 179.57                      | 3.23         | 177.36             | 1.02         |
| C1-Re1-C2     | 88.43  | 90.91                      | 2.48         | 88.77             | 0.34         | 91.39                       | 2.96         | 89.62              | 1.19         |
| C1-Re1-C3     | 86.41  | 90.52                      | 4.11         | 88.10             | 1.69         | 90.81                       | 4.40         | 89.42              | 3.01         |
| C2-Re1-C3     | 89.95  | 90.93                      | 0.98         | 88.57             | 1.38         | 91.34                       | 1.39         | 89.40              | 0.55         |
| N2-Re1-C1     | 91.06  | 91.77                      | 0.71         | 92.48             | 1.42         | 91.26                       | 0.20         | 91.82              | 0.76         |
| N2-Re1-C2     | 92.62  | 92.52                      | 0.10         | 93.26             | 0.64         | 92.09                       | 0.53         | 92.94              | 0.32         |
| O1-C1-Re1     | 178.64 | 178.98                     | 0.34         | 179.74            | 1.10         | 178.63                      | 0.01         | 179.36             | 0.72         |
| O2-C2-Re2     | 176.85 | 175.58                     | 1.27         | 177.29            | 0.44         | 175.24                      | 1.61         | 176.87             | 0.02         |
| O3-C3-Re3     | 175.66 | 179.73                     | 4.07         | 178.96            | 3.30         | 179.57                      | 3.91         | 179.52             | 3.86         |
| <b>MAD</b>    |        |                            | <b>1.33</b>  |                   | <b>1.06</b>  |                             | <b>1.68</b>  |                    | <b>1.12</b>  |
| N1-Re1-N2-C13 | 98.36  | 87.50                      | 10.86        | 89.36             | 9.00         | 88.72                       | 9.64         | 89.07              | 9.29         |
| N1-Re1-N2-C15 | -83.63 | -93.94                     | 10.31        | -93.34            | 9.71         | -93.50                      | 9.87         | -94.18             | 10.55        |
| <b>MAD</b>    |        |                            | <b>10.59</b> |                   | <b>9.36</b>  |                             | <b>9.76</b>  |                    | <b>9.92</b>  |

**Table S12.** Comparison of the experimentally obtained and calculated bond lengths and angles for complex **10** (MAD means the Mean Absolute Deviation).

| Complex 10    | 1st molecule | PBE0               |              | PBE0      |              | B3LYP              |              | B3LYP     |              |
|---------------|--------------|--------------------|--------------|-----------|--------------|--------------------|--------------|-----------|--------------|
|               |              | LANL2DZ/6-31G(d,p) |              | def2-TZVP |              | LANL2DZ/6-31G(d,p) |              | def2-TZVP |              |
|               | Exp          | Calc               | Exp-Calc     | Calc      | Exp-Calc     | Calc               | Exp-Calc     | Calc      | Exp-Calc     |
| Re1-C1        | 1.926        | 1.919              | 0.007        | 1.922     | 0.004        | 1.931              | 0.005        | 1.937     | 0.011        |
| Re1-C2        | 1.915        | 1.900              | 0.015        | 1.903     | 0.012        | 1.913              | 0.002        | 1.919     | 0.004        |
| Re1-C3        | 1.948        | 1.915              | 0.033        | 1.917     | 0.031        | 1.926              | 0.022        | 1.931     | 0.017        |
| Re1-N1        | 2.165        | 2.186              | 0.021        | 2.198     | 0.033        | 2.218              | 0.053        | 2.228     | 0.063        |
| Re1-O4        | 2.134        | 2.130              | 0.004        | 2.122     | 0.012        | 2.148              | 0.014        | 2.141     | 0.007        |
| Re1-N2        | 2.189        | 2.224              | 0.035        | 2.236     | 0.047        | 2.264              | 0.075        | 2.273     | 0.084        |
| C11-O4        | 1.329        | 1.300              | 0.029        | 1.296     | 0.033        | 1.307              | 0.022        | 1.303     | 0.026        |
| <b>MAD</b>    |              |                    | <b>0.021</b> |           | <b>0.025</b> |                    | <b>0.028</b> |           | <b>0.030</b> |
| N1-Re1-O4     | 76.39        | 76.25              | 0.14         | 75.66     | 0.73         | 75.81              | 0.58         | 75.20     | 1.19         |
| N1-Re1-N2     | 82.40        | 85.28              | 2.88         | 85.98     | 3.58         | 85.68              | 3.28         | 86.35     | 3.95         |
| O4-Re1-N2     | 81.55        | 80.50              | 1.05         | 80.82     | 0.73         | 80.72              | 0.83         | 80.99     | 0.56         |
| N1-Re1-C1     | 170.53       | 171.77             | 1.24         | 173.17    | 2.64         | 171.32             | 0.79         | 172.26    | 1.73         |
| O4-Re1-C2     | 174.65       | 173.00             | 1.65         | 173.66    | 0.99         | 172.47             | 2.18         | 173.16    | 1.49         |
| N2-Re1-C3     | 176.43       | 173.82             | 2.61         | 175.79    | 0.64         | 173.90             | 2.53         | 175.36    | 1.07         |
| C1-Re1-C2     | 89.74        | 90.35              | 0.61         | 88.31     | 1.43         | 90.82              | 1.08         | 89.15     | 0.59         |
| C1-Re1-C3     | 88.82        | 90.52              | 1.70         | 88.67     | 0.15         | 90.79              | 1.97         | 89.38     | 0.56         |
| C2-Re1-C3     | 86.46        | 89.63              | 3.17         | 87.31     | 0.85         | 90.10              | 3.64         | 88.19     | 1.73         |
| N2-Re1-C1     | 91.72        | 90.02              | 1.70         | 91.66     | 0.06         | 90.51              | 1.21         | 91.04     | 0.68         |
| N2-Re1-C2     | 97.08        | 96.37              | 0.71         | 96.89     | 0.19         | 95.84              | 1.24         | 96.44     | 0.64         |
| O1-C1-Re1     | 177.78       | 178.93             | 1.15         | 179.65    | 1.87         | 178.59             | 0.81         | 179.37    | 1.59         |
| O2-C2-Re2     | 176.10       | 177.12             | 1.02         | 177.87    | 1.77         | 176.87             | 0.77         | 177.70    | 1.60         |
| O3-C3-Re3     | 176.17       | 179.63             | 3.46         | 179.09    | 2.92         | 179.36             | 3.19         | 179.66    | 3.49         |
| <b>MAD</b>    |              |                    | <b>1.65</b>  |           | <b>1.33</b>  |                    | <b>1.72</b>  |           | <b>1.49</b>  |
| N1-Re1-N2-C13 | 69.10        | 75.32              | 6.22         | 77.87     | 8.77         | 76.39              | 7.29         | 78.67     | 9.57         |
| N1-Re1-N2-C15 | -109.84      | -107.33            | 2.51         | -106.34   | 3.50         | -106.79            | 3.05         | -105.78   | 4.06         |
| <b>MAD</b>    |              |                    | <b>4.37</b>  |           | <b>6.14</b>  |                    | <b>5.17</b>  |           | <b>6.82</b>  |



**Table S13.** Comparison of the experimentally obtained and calculated bond lengths and angles for complex **10** (MAD means the Mean Absolute Deviation).

| Complex 10    | 2nd molecule | PBE0               |              | PBE0      |              | B3LYP              |              | B3LYP     |              |
|---------------|--------------|--------------------|--------------|-----------|--------------|--------------------|--------------|-----------|--------------|
|               |              | LANL2DZ/6-31G(d,p) |              | def2-TZVP |              | LANL2DZ/6-31G(d,p) |              | def2-TZVP |              |
|               | Exp          | Calc               | Exp-Calc     | Calc      | Exp-Calc     | Calc               | Exp-Calc     | Calc      | Exp-Calc     |
| Re2-C21       | 1.923        | 1.919              | 0.004        | 1.922     | 0.001        | 1.931              | 0.008        | 1.937     | 0.014        |
| Re2-C22       | 1.899        | 1.900              | 0.001        | 1.903     | 0.004        | 1.913              | 0.014        | 1.919     | 0.020        |
| Re2-C23       | 1.936        | 1.915              | 0.021        | 1.917     | 0.019        | 1.926              | 0.010        | 1.931     | 0.005        |
| Re2-N4        | 2.176        | 2.186              | 0.010        | 2.198     | 0.022        | 2.218              | 0.042        | 2.228     | 0.052        |
| Re2-O8        | 2.131        | 2.130              | 0.001        | 2.122     | 0.009        | 2.148              | 0.017        | 2.141     | 0.010        |
| Re2-N5        | 2.197        | 2.224              | 0.027        | 2.236     | 0.039        | 2.264              | 0.067        | 2.273     | 0.076        |
| C31-O8        | 1.332        | 1.300              | 0.032        | 1.296     | 0.036        | 1.307              | 0.025        | 1.303     | 0.029        |
| <b>MAD</b>    |              |                    | <b>0.014</b> |           | <b>0.019</b> |                    | <b>0.026</b> |           | <b>0.029</b> |
| N4-Re2-O8     | 76.48        | 76.25              | 0.23         | 75.66     | 0.82         | 75.81              | 0.67         | 75.20     | 1.28         |
| N4-Re2-N5     | 82.50        | 85.28              | 2.78         | 85.98     | 3.48         | 85.68              | 3.18         | 86.35     | 3.85         |
| O8-Re2-N5     | 81.24        | 80.50              | 0.74         | 80.82     | 0.42         | 80.72              | 0.52         | 80.99     | 0.25         |
| N4-Re2-C21    | 172.30       | 171.77             | 0.53         | 173.17    | 0.87         | 171.32             | 0.98         | 172.26    | 0.04         |
| O8-Re2-C22    | 175.32       | 173.00             | 2.32         | 173.66    | 1.66         | 172.47             | 2.85         | 173.16    | 2.16         |
| N5-Re2-C23    | 175.73       | 173.82             | 1.91         | 175.79    | 0.06         | 173.90             | 1.83         | 175.36    | 0.37         |
| C21-Re2-C22   | 87.00        | 90.35              | 3.35         | 88.31     | 1.31         | 90.82              | 3.82         | 89.15     | 2.15         |
| C21-Re2-C23   | 89.42        | 90.52              | 1.10         | 88.67     | 0.75         | 90.79              | 1.37         | 89.38     | 0.04         |
| C22-Re2-C23   | 86.35        | 89.63              | 3.28         | 87.31     | 0.96         | 90.10              | 3.75         | 88.19     | 1.84         |
| N5-Re2-C21    | 91.80        | 90.02              | 1.78         | 91.66     | 0.14         | 90.51              | 1.29         | 91.04     | 0.76         |
| N5-Re2-C22    | 97.80        | 96.37              | 1.43         | 96.89     | 0.91         | 95.84              | 1.96         | 96.44     | 1.36         |
| O5-C21-Re2    | 179.22       | 178.93             | 0.29         | 179.65    | 0.43         | 178.59             | 0.63         | 179.37    | 0.15         |
| O6-C22-Re2    | 176.84       | 177.12             | 0.28         | 177.87    | 1.03         | 176.87             | 0.03         | 177.70    | 0.86         |
| O7-C23-Re2    | 177.38       | 179.63             | 2.25         | 179.09    | 1.71         | 179.36             | 1.98         | 179.66    | 2.28         |
| <b>MAD</b>    |              |                    | <b>1.59</b>  |           | <b>1.04</b>  |                    | <b>1.78</b>  |           | <b>1.24</b>  |
| N4-Re2-N5-C33 | 70.90        | 75.32              | 4.42         | 77.87     | 6.97         | 76.39              | 5.49         | 78.67     | 7.77         |
| N4-Re2-N5-C35 | -109.27      | -107.33            | 1.94         | -106.34   | 2.93         | -106.79            | 2.48         | -105.78   | 3.49         |
| <b>MAD</b>    |              |                    | <b>3.18</b>  |           | <b>4.95</b>  |                    | <b>3.98</b>  |           | <b>5.63</b>  |

**Table S14.** Comparison of the experimentally obtained and calculated bond lengths and angles for complex **11** (MAD means the Mean Absolute Deviation).

| Complex 11    | Exp    | PBE0<br>LANL2DZ/6-31G(d,p) |              | PBE0<br>def2-TZVP |              | B3LYP<br>LANL2DZ/6-31G(d,p) |              | B3LYP<br>def2-TZVP |              |
|---------------|--------|----------------------------|--------------|-------------------|--------------|-----------------------------|--------------|--------------------|--------------|
|               |        | Calc                       | Exp-Calc     | Calc              | Exp-Calc     | Calc                        | Exp-Calc     | Calc               | Exp-Calc     |
| Re1-C1        | 1.917  | 1.920                      | 0.003        | 1.922             | 0.005        | 1.931                       | 0.014        | 1.937              | 0.020        |
| Re1-C2        | 1.908  | 1.900                      | 0.008        | 1.903             | 0.005        | 1.913                       | 0.005        | 1.920              | 0.012        |
| Re1-C3        | 1.923  | 1.916                      | 0.007        | 1.917             | 0.006        | 1.926                       | 0.003        | 1.932              | 0.009        |
| Re1-N1        | 2.172  | 2.187                      | 0.015        | 2.197             | 0.025        | 2.218                       | 0.046        | 2.227              | 0.055        |
| Re1-O4        | 2.140  | 2.153                      | 0.013        | 2.144             | 0.004        | 2.172                       | 0.032        | 2.164              | 0.024        |
| Re1-N2        | 2.204  | 2.214                      | 0.010        | 2.225             | 0.021        | 2.252                       | 0.048        | 2.261              | 0.057        |
| C11-O4        | 1.333  | 1.312                      | 0.021        | 1.307             | 0.026        | 1.320                       | 0.013        | 1.313              | 0.020        |
| <b>MAD</b>    |        |                            | <b>0.011</b> |                   | <b>0.013</b> |                             | <b>0.023</b> |                    | <b>0.028</b> |
| N1-Re1-O4     | 76.56  | 76.06                      | 0.50         | 75.50             | 1.06         | 75.57                       | 0.99         | 75.03              | 1.53         |
| N1-Re1-N2     | 84.29  | 86.24                      | 1.95         | 86.72             | 2.43         | 86.85                       | 2.56         | 87.12              | 2.83         |
| O4-Re1-N2     | 81.15  | 79.95                      | 1.20         | 79.97             | 1.18         | 79.95                       | 1.20         | 80.02              | 1.13         |
| N1-Re1-C1     | 175.77 | 172.28                     | 3.49         | 173.39            | 2.38         | 171.88                      | 3.89         | 172.50             | 3.27         |
| O4-Re1-C2     | 171.46 | 172.41                     | 0.95         | 173.19            | 1.73         | 171.67                      | 0.21         | 172.58             | 1.12         |
| N2-Re1-C3     | 176.15 | 173.61                     | 2.54         | 175.20            | 0.95         | 173.63                      | 2.52         | 174.77             | 1.38         |
| C1-Re1-C2     | 87.24  | 90.40                      | 3.16         | 88.43             | 1.19         | 90.92                       | 3.68         | 89.30              | 2.06         |
| C1-Re1-C3     | 87.52  | 90.35                      | 2.83         | 88.53             | 1.01         | 90.63                       | 3.11         | 89.26              | 1.74         |
| C2-Re1-C3     | 85.32  | 89.60                      | 4.28         | 87.36             | 2.04         | 90.10                       | 4.78         | 88.24              | 2.92         |
| N2-Re1-C1     | 91.80  | 90.79                      | 1.01         | 91.66             | 0.14         | 90.29                       | 1.51         | 90.96              | 0.84         |
| N2-Re1-C2     | 98.43  | 96.68                      | 1.75         | 97.44             | 0.99         | 96.20                       | 2.23         | 96.99              | 1.44         |
| O1-C1-Re1     | 177.39 | 179.04                     | 1.65         | 179.45            | 2.06         | 178.70                      | 1.31         | 179.23             | 1.84         |
| O2-C2-Re2     | 175.56 | 176.96                     | 1.40         | 177.64            | 2.08         | 176.68                      | 1.12         | 177.52             | 1.96         |
| O3-C3-Re3     | 176.71 | 179.51                     | 2.80         | 179.18            | 2.47         | 179.28                      | 2.57         | 179.61             | 2.90         |
| <b>MAD</b>    |        |                            | <b>2.11</b>  |                   | <b>1.55</b>  |                             | <b>2.26</b>  |                    | <b>1.93</b>  |
| N1-Re1-N2-C13 | 97.44  | 90.66                      | 6.78         | 92.86             | 4.58         | 92.75                       | 4.69         | 93.84              | 3.60         |
| N1-Re1-N2-C15 | -93.83 | -95.48                     | 1.65         | -94.22            | 0.39         | -94.36                      | 0.53         | -94.01             | 0.18         |
| <b>MAD</b>    |        |                            | <b>2.60</b>  |                   | <b>1.68</b>  |                             | <b>2.46</b>  |                    | <b>1.94</b>  |

**Table S15.** Comparison of the experimentally obtained and calculated bond lengths and angles for complex 12 (MAD means the Mean Absolute Deviation).

| Complex 12    | Exp     | PBE0<br>LANL2DZ/6-31G(d,p) |              | PBE0<br>def2-TZVP |              | B3LYP<br>LANL2DZ/6-31G(d,p) |              | B3LYP<br>def2-TZVP |              |
|---------------|---------|----------------------------|--------------|-------------------|--------------|-----------------------------|--------------|--------------------|--------------|
|               |         | Calc                       | Exp-Calc     | Calc              | Exp-Calc     | Calc                        | Exp-Calc     | Calc               | Exp-Calc     |
| Re1-C1        | 1.924   | 1.921                      | 0.003        | 1.923             | 0.001        | 1.932                       | 0.008        | 1.938              | 0.014        |
| Re1-C2        | 1.904   | 1.901                      | 0.003        | 1.904             | 0.000        | 1.914                       | 0.010        | 1.920              | 0.016        |
| Re1-C3        | 1.918   | 1.918                      | 0.000        | 1.920             | 0.002        | 1.928                       | 0.010        | 1.934              | 0.016        |
| Re1-N1        | 2.173   | 2.187                      | 0.014        | 2.196             | 0.023        | 2.218                       | 0.045        | 2.226              | 0.053        |
| Re1-O4        | 2.145   | 2.151                      | 0.006        | 2.142             | 0.003        | 2.170                       | 0.025        | 2.161              | 0.016        |
| Re1-N2        | 2.189   | 2.195                      | 0.006        | 2.207             | 0.018        | 2.229                       | 0.040        | 2.237              | 0.048        |
| C11-O4        | 1.320   | 1.314                      | 0.006        | 1.308             | 0.012        | 1.321                       | 0.001        | 1.314              | 0.006        |
| <b>MAD</b>    |         |                            | <b>0.005</b> |                   | <b>0.008</b> |                             | <b>0.020</b> |                    | <b>0.024</b> |
| N1-Re1-O4     | 76.60   | 76.05                      | 0.55         | 75.53             | 1.07         | 75.57                       | 1.03         | 75.08              | 1.52         |
| N1-Re1-N2     | 85.05   | 86.39                      | 1.34         | 86.73             | 1.68         | 86.77                       | 1.72         | 86.95              | 1.90         |
| O4-Re1-N2     | 81.41   | 80.00                      | 1.41         | 80.00             | 1.41         | 79.94                       | 1.47         | 80.06              | 1.35         |
| N1-Re1-C1     | 173.23  | 172.25                     | 0.98         | 173.29            | 0.06         | 171.80                      | 1.43         | 172.38             | 0.85         |
| O4-Re1-C2     | 169.03  | 170.70                     | 1.67         | 171.56            | 2.53         | 170.11                      | 1.08         | 171.06             | 2.03         |
| N2-Re1-C3     | 178.23  | 175.29                     | 2.94         | 177.00            | 1.23         | 175.17                      | 3.06         | 176.48             | 1.75         |
| C1-Re1-C2     | 90.28   | 90.60                      | 0.32         | 88.61             | 1.67         | 91.08                       | 0.80         | 89.47              | 0.81         |
| C1-Re1-C3     | 83.59   | 90.27                      | 6.68         | 88.49             | 4.90         | 90.56                       | 6.97         | 89.21              | 5.62         |
| C2-Re1-C3     | 89.59   | 90.79                      | 1.20         | 88.66             | 0.93         | 91.18                       | 1.59         | 89.46              | 0.13         |
| N2-Re1-C1     | 98.17   | 91.33                      | 6.84         | 92.13             | 6.04         | 90.92                       | 7.25         | 91.56              | 6.61         |
| N2-Re1-C2     | 90.24   | 93.62                      | 3.38         | 94.29             | 4.05         | 93.39                       | 3.15         | 93.98              | 3.74         |
| O1-C1-Re1     | 173.28  | 178.95                     | 5.67         | 179.35            | 6.07         | 178.63                      | 5.35         | 179.12             | 5.84         |
| O2-C2-Re2     | 175.07  | 176.36                     | 1.29         | 177.75            | 2.68         | 176.03                      | 0.96         | 177.34             | 2.27         |
| O3-C3-Re3     | 176.49  | 179.75                     | 3.26         | 179.14            | 2.65         | 179.49                      | 3.00         | 179.67             | 3.18         |
| <b>MAD</b>    |         |                            | <b>2.68</b>  |                   | <b>2.64</b>  |                             | <b>2.78</b>  |                    | <b>2.69</b>  |
| N1-Re1-N2-C13 | 17.01   | 91.06                      | 74.05        | 92.73             | 75.72        | 91.82                       | 74.81        | 92.81              | 75.80        |
| N1-Re1-N2-C15 | -168.05 | -92.87                     | 75.18        | -92.04            | 76.01        | -92.80                      | 75.25        | -92.56             | 75.49        |
| <b>MAD</b>    |         |                            | <b>74.62</b> |                   | <b>75.87</b> |                             | <b>75.03</b> |                    | <b>75.65</b> |

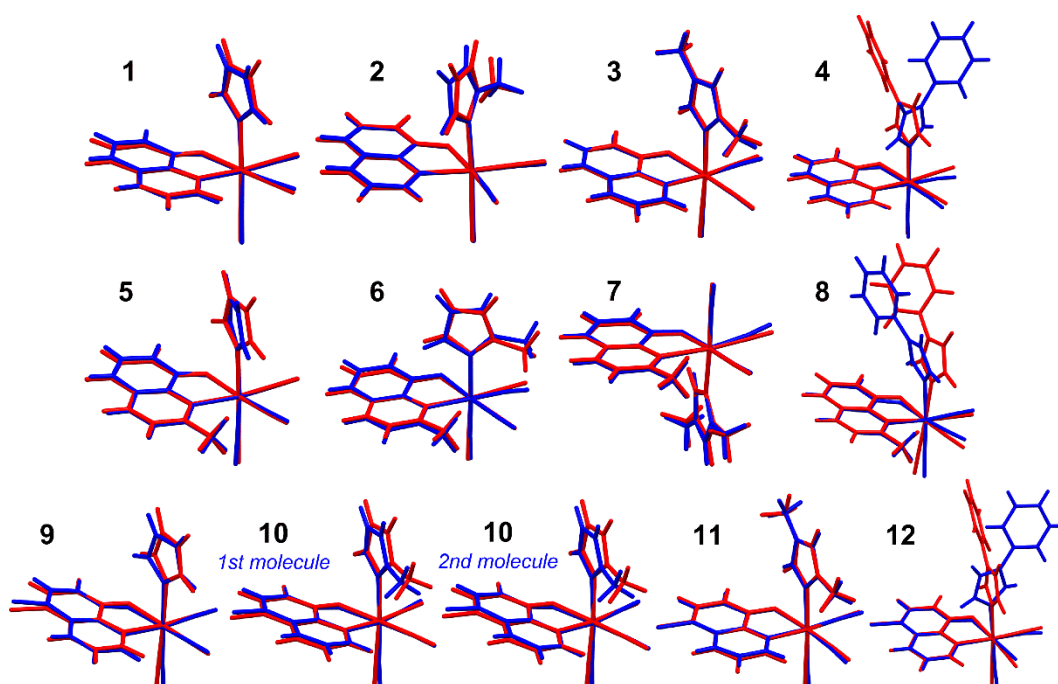

**Fig. S2.** Illustration of the overlay of the scXRD molecular structures (blue) and DFT (pbe0/ def2-TZVP/ECP(Re)) optimized ones (red) for the Re(I) complexes: **1** (RMSD = 0.115 Å), **2** (RMSD = 0.146 Å), **3** (RMSD = 0.105 Å), **4** (RMSD = 1.172 Å), **5** (RMSD = 0.152 Å), **6** (RMSD = 0.231 Å), **7** (RMSD = 0.128 Å), **8** (RMSD = 0.451 Å), **9** (RMSD = 0.187 Å), **10** 1<sup>st</sup> molecule (RMSD = 0.187 Å), **10** 2<sup>nd</sup> molecule (RMSD = 0.209 Å), **11** (RMSD = 0.109 Å), **12** (RMSD = 1.152 Å). For **10**, two scXRD molecular structures are considered (Figure S3).

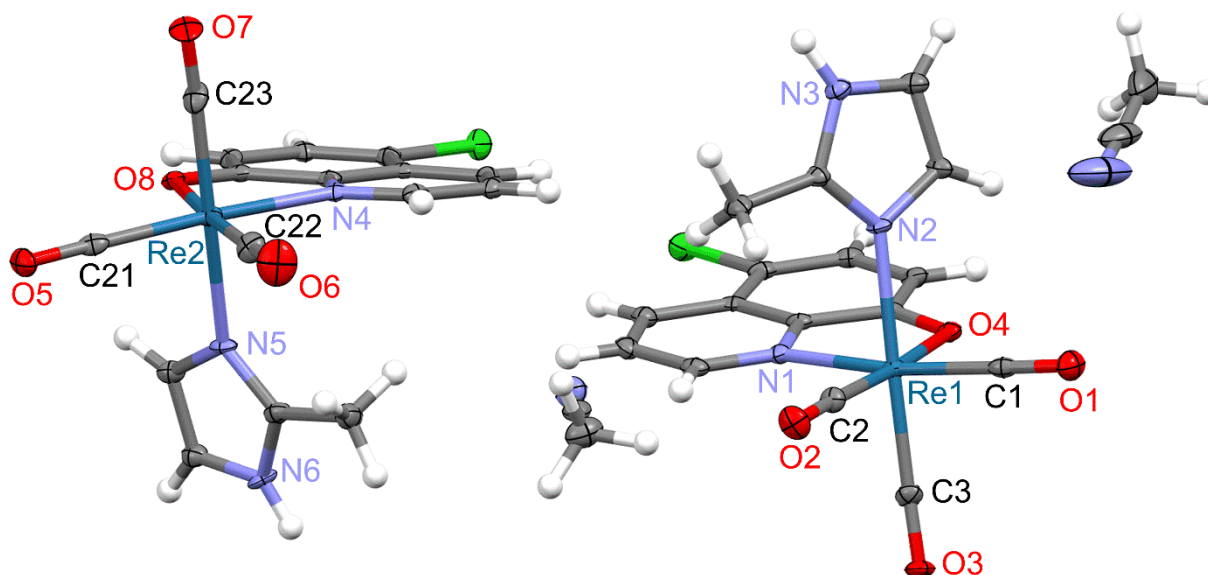

**Fig. S3.** Molecular structure of  $[\text{Re}(\text{CO})_3(\text{Cl})\text{MeHim}]\cdot\text{CH}_3\text{CN}$  (**10** $\cdot\text{CH}_3\text{CN}$ ) complex showing two crystallographically independent metal complex molecules and co-crystallized solvent molecules. Thermal ellipsoids are plotted at a 50% probability level.

**Table S16.** Geometric parameters associated with intermolecular N–H···O hydrogen bond for studied rhenium(I) complexes (atoms labeling for complex **10** according to Figure S3).

| Complex   | Structural motif | D–H···A                 | d(D–H) [Å] | d(H···A) [Å] | d(D···A) [Å] | <(D–H–A) [°] | Symmetry code (i)          |
|-----------|------------------|-------------------------|------------|--------------|--------------|--------------|----------------------------|
| <b>1</b>  | chain            | N3–H3···O4 <sup>i</sup> | 0.85(3)    | 1.90(3)      | 2.741(2)     | 173(3)       | <i>x+1, y, z</i>           |
| <b>2</b>  | chain            | N3–H3···O4 <sup>i</sup> | 0.83(4)    | 1.97(4)      | 2.772(4)     | 160(4)       | <i>-x+1, y+0.5, -z+0.5</i> |
| <b>3</b>  | dimer            | N3–H3···O4 <sup>i</sup> | 0.84(3)    | 2.27(3)      | 2.927(3)     | 135(3)       | <i>-x, -y, -z+1</i>        |
| <b>4</b>  | dimer            | N3–H3···O4 <sup>i</sup> | 0.95(5)    | 1.78(5)      | 2.716(4)     | 167(5)       | <i>-x+1.5, -y+0.5, -z</i>  |
| <b>5</b>  | chain            | N3–H3···O4 <sup>i</sup> | 0.85(3)    | 1.95(3)      | 2.787(3)     | 168(3)       | <i>x+1, y, z</i>           |
| <b>6</b>  | dimer            | N3–H3···O4 <sup>i</sup> | 0.78(2)    | 2.12(2)      | 2.863(2)     | 159(3)       | <i>-x+1, -y+1, -z</i>      |
| <b>7</b>  | dimer            | N3–H3···O4 <sup>i</sup> | 0.86(3)    | 2.26(3)      | 2.914(3)     | 132(3)       | <i>-x+1, -y+1, -z</i>      |
| <b>8</b>  | dimer            | N3–H3···O1 <sup>i</sup> | 0.79(4)    | 2.40(3)      | 3.008(3)     | 135(3)       | <i>-x, -y+1, -z+2</i>      |
| <b>9</b>  | chain            | N3–H3···O4 <sup>i</sup> | 0.81(4)    | 1.97(4)      | 2.751(4)     | 162(4)       | <i>x+2, y, z</i>           |
| <b>10</b> | chain            | N3–H3···O8 <sup>i</sup> | 0.94(6)    | 1.84(6)      | 2.755(6)     | 166(5)       | <i>-x+1, -y+1, -z+1</i>    |
|           |                  | N6–H6···O4 <sup>i</sup> | 0.84(4)    | 1.92(3)      | 2.750(5)     | 167(4)       | <i>-x, -y+1, -z+1</i>      |
| <b>11</b> | dimer            | N3–H3···O4 <sup>i</sup> | 0.89(3)    | 2.24(4)      | 2.955(4)     | 137(4)       | <i>-x+2, -y, -z+1</i>      |
| <b>12</b> | dimer            | N3–H3···O4 <sup>i</sup> | 0.85(9)    | 1.88(9)      | 2.719(6)     | 167(7)       | <i>-x+1, -y+1, -z+1</i>    |

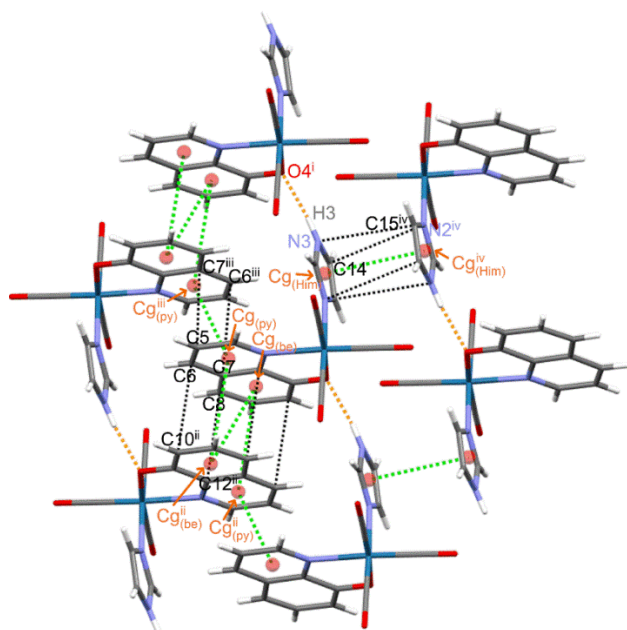

**Figure S4.** Fragment of the crystal structure of **1** showing some intermolecular interactions: hydrogen bonds (orange dotted lines) – 2.741(2) Å (N3–H3...O4<sup>i</sup>), the shortest interatomic contacts between rings (black dotted lines) – 3.336(3) Å (C6...C10<sup>ii</sup>), 3.380(3) Å (C7...C6<sup>iii</sup>), 3.345(3) Å (C5...C7<sup>iii</sup>), 3.352(3) Å (C8...C12<sup>ii</sup>), 3.481(3) Å (N3...C15<sup>iv</sup>), 3.587(3) Å (C14...N2<sup>iv</sup>); and the shortest distances between centroids (green dotted lines) – 3.607 Å (Cg(Him)...Cg<sup>iv</sup>(Him)), 3.619 Å (Cg<sup>ii</sup>(be)...Cg<sup>ii</sup>(be)), 3.737 Å (Cg<sup>iii</sup>(py)...Cg<sup>iii</sup>(py)), 3.768 Å (Cg<sup>ii</sup>(py)...Cg<sup>ii</sup>(be)). (Symmetry codes: (i)  $x+1, y, z$ ; (ii)  $-x, -y+1, -z$ ; (iii)  $-x+1, -y+1, -z$ ; (iv)  $-x+1, -y+1, -z+1$ ).

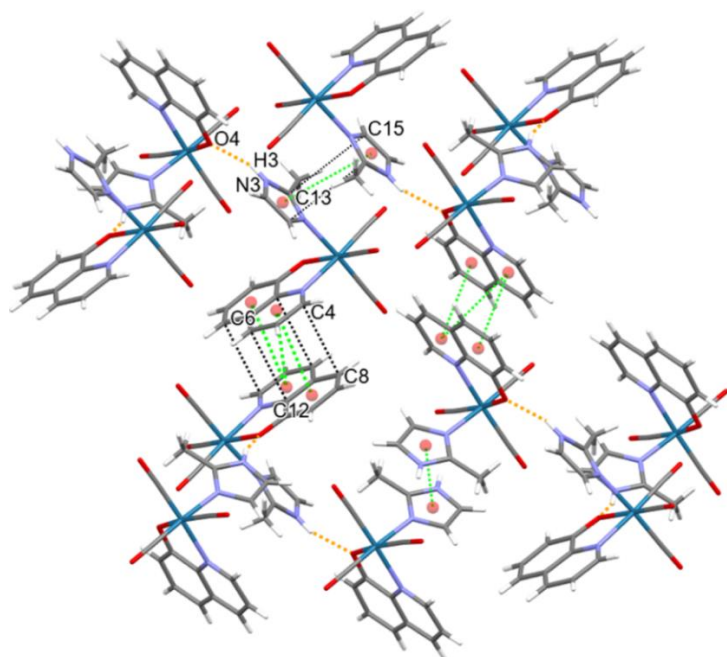

**Figure S5.** Fragment of the crystal structure of **2** showing some intermolecular interactions: hydrogen bonds (orange dotted lines) – 2.772(4) Å (N3–H3...O4<sup>i</sup>), the shortest interatomic contacts between rings (black dotted lines) – 3.420(3) Å (C4...C8<sup>ii</sup>), 3.500(4) Å (C6...C12<sup>ii</sup>), 3.586(4) Å (C5...C9<sup>ii</sup>), 4.019(4) Å (C13...C15<sup>iii</sup>), and the shortest distances between centroids of rings (green dotted lines) – 3.725 Å (Cg<sup>ii</sup>(py)...Cg<sup>ii</sup>(py)), 4.179 Å (Cg(MeHim)...Cg<sup>iii</sup>(MeHim)) (Symmetry codes: (i)  $-x+1, y+0.5, -z+0.5$ ; (ii)  $-x+2, -y+1, -z+1$ ; (iii)  $-x+1, -y+1, -z$ ).

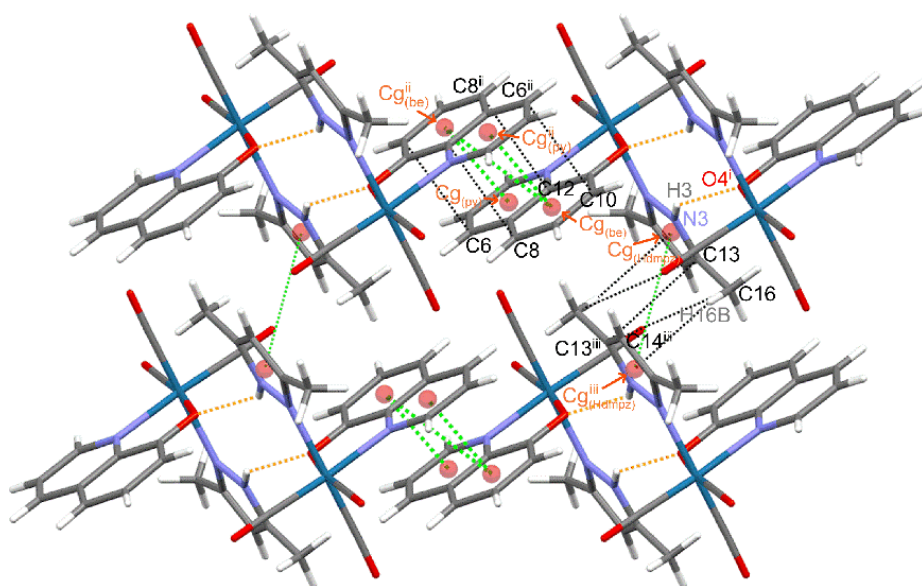

**Figure S6.** Fragment of the crystal structure of **3** showing some intermolecular interactions: hydrogen bonds (orange dotted lines) – 2.927(3) Å (N3–H3···O4<sup>i</sup>), the shortest interatomic contacts between rings (black dotted lines) *c* 3.468(5) Å (C13···C13<sup>iii</sup>), 3.538(4) Å (C16···C14<sup>iii</sup>), 2.690(4) Å (H16B···C14<sup>iii</sup>), 2.725(4) Å (H16B···Cg<sup>iii</sup>(Hdmpz)); and the shortest distances between centroids (green dotted lines) – 3.690 Å (Cg<sup>(be)</sup>···Cg<sup>ii</sup>(be)), 3.963 Å (Cg<sup>(py)</sup>···Cg<sup>ii</sup>(be)), 4.447 Å (Cg<sup>(Hdmpz)</sup>···Cg<sup>iii</sup>(Hdmpz)) (Symmetry codes: (i) =  $-x, -y, -z+1$ ; (ii) =  $-x, -y, -z$ ; (iii) =  $-x+1, -y, -z+1$ ).

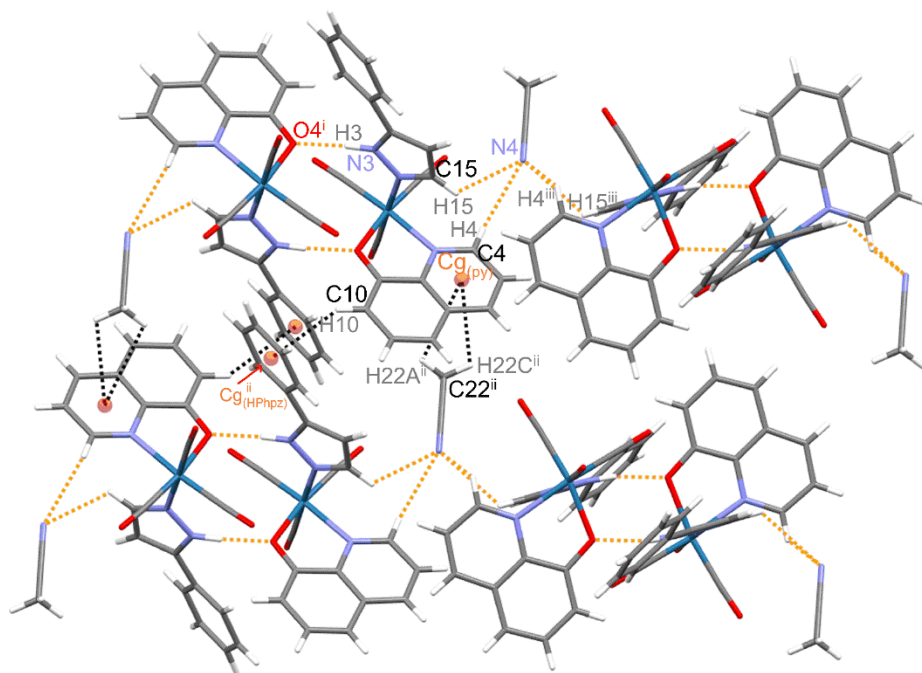

**Figure S7.** Fragment of the crystal structure of **4** showing some intermolecular interactions: hydrogen bonds (orange dotted lines) – 2.716(4) Å (N3–H3···O4<sup>i</sup>), 3.298 Å (C15–H15···N4), 3.546 Å (C4–H4···N4), and the shortest interatomic contacts (black dotted lines) – 2.811 Å (H10···Cg<sup>ii</sup>(HPhpz)), 3.421 Å (Cg<sup>(py)</sup>···H22A<sup>ii</sup>), 3.454 Å (Cg<sup>(py)</sup>···H22C<sup>ii</sup>), 3.909 Å (Cg<sup>(py)</sup>···C22<sup>ii</sup>) (Symmetry codes: (i) =  $-x+1.5, -y+0.5, -z$ ; (ii) =  $x+0.5, y-0.5, z$ ; (iii) =  $-x+1, y, -z+0.5$ ).



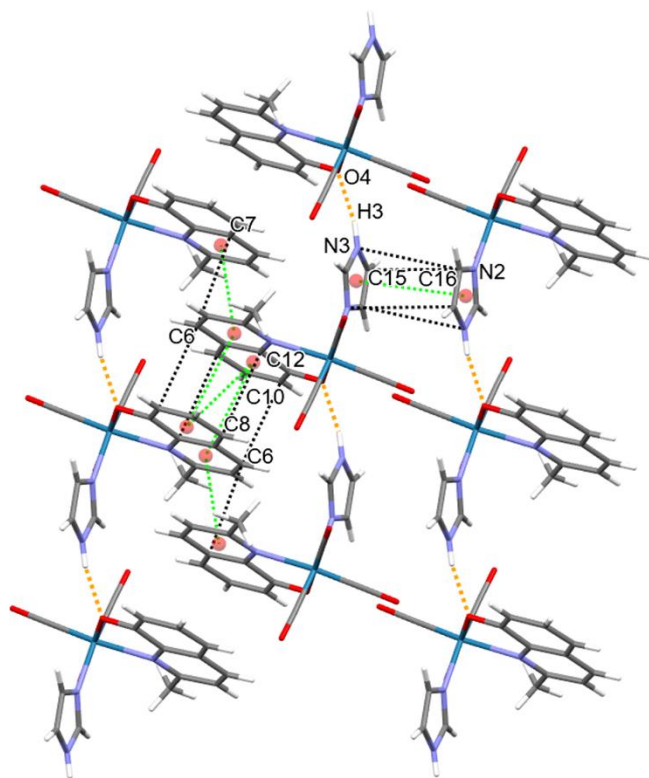

**Figure S8.** Fragment of the crystal structure of **5** showing some intermolecular interactions: hydrogen bonds (orange dotted lines) – 2.787(3) Å (N3–H3⋯O4<sup>i</sup>), the shortest interatomic contacts between rings (black dotted lines) – 3.297(5) Å (C10⋯C6<sup>ii</sup>), 3.345(4) Å (C12⋯C8<sup>ii</sup>), 3.365(4) Å (C6⋯C7<sup>iii</sup>), 3.819(5) Å (N2⋯C15<sup>iv</sup>), 3.822(4) Å (N3⋯C16<sup>iv</sup>), and the shortest distances between centroids of rings (green dotted lines) – 3.636 Å (Cg<sub>(be)</sub>⋯Cg<sup>ii</sup><sub>(be)</sub>), 3.688 Å (Cg<sub>(py)</sub>⋯Cg<sup>ii</sup><sub>(be)</sub>), 3.769 Å (Cg<sub>(py)</sub>⋯Cg<sup>iii</sup><sub>(py)</sub>), 3.891 Å (Cg<sub>(Him)</sub>⋯Cg<sup>iv</sup><sub>(Him)</sub>). (Symmetry codes: (i) =  $x+1, y, z$ ; (ii) =  $-x, -y+1, -z+2$ ; (iii) =  $-x+1, -y+1, -z+2$ ; (iv) =  $-x+1, -y+1, -z+1$ ).

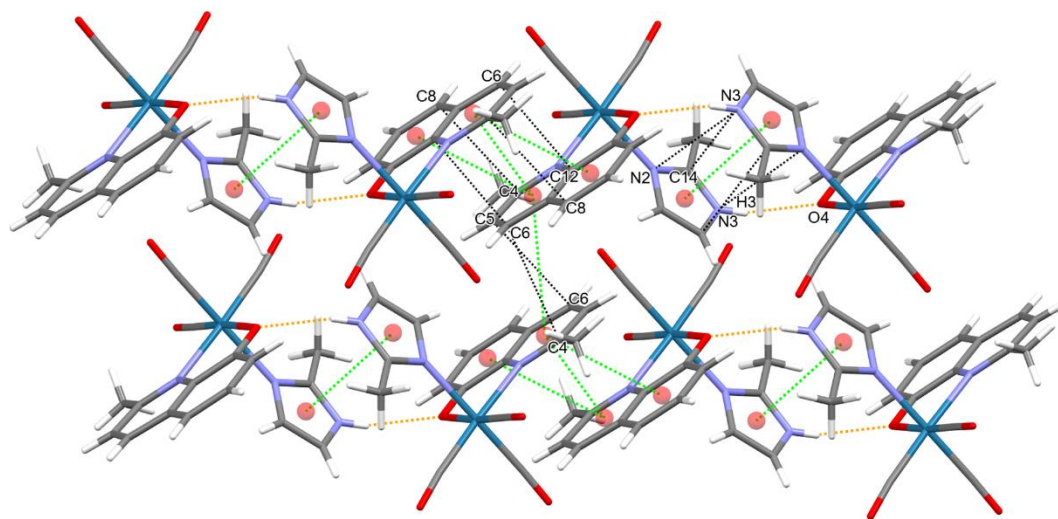

**Figure S9.** Fragment of the crystal structure of **6** showing some intermolecular interactions: hydrogen bonds (orange dotted lines) – 2.863(2) Å (N3–H3⋯O4<sup>i</sup>), the shortest interatomic contacts between rings (black dotted lines) – 3.371(3) Å (C12⋯C6<sup>ii</sup>), 3.461(3) Å (C4⋯C8<sup>ii</sup>), 3.429(3) Å (C5⋯C6<sup>iii</sup>), 3.471(3) Å (C6⋯C4<sup>iii</sup>), 3.383(3) Å (N2⋯N3<sup>i</sup>), 3.397(3) Å (C14⋯C15<sup>i</sup>), and the shortest distances between centroids of rings (green dotted lines) – 3.722 Å (Cg<sub>(py)</sub>⋯Cg<sup>ii</sup><sub>(be)</sub>), 3.810 Å (Cg<sub>(py)</sub>⋯Cg<sup>ii</sup><sub>(py)</sub>), 3.931 Å (Cg<sub>(py)</sub>⋯Cg<sup>iii</sup><sub>(py)</sub>), 3.467 Å (Cg<sub>(MeHim)</sub>⋯Cg<sup>i</sup><sub>(meHim)</sub>). (Symmetry codes: (i) =  $-x+1, -y+1, -z$ ; (ii) =  $-x+2, -y+1, -z+1$ ; (iii) =  $-x+1, -y+1, -z+1$ ).



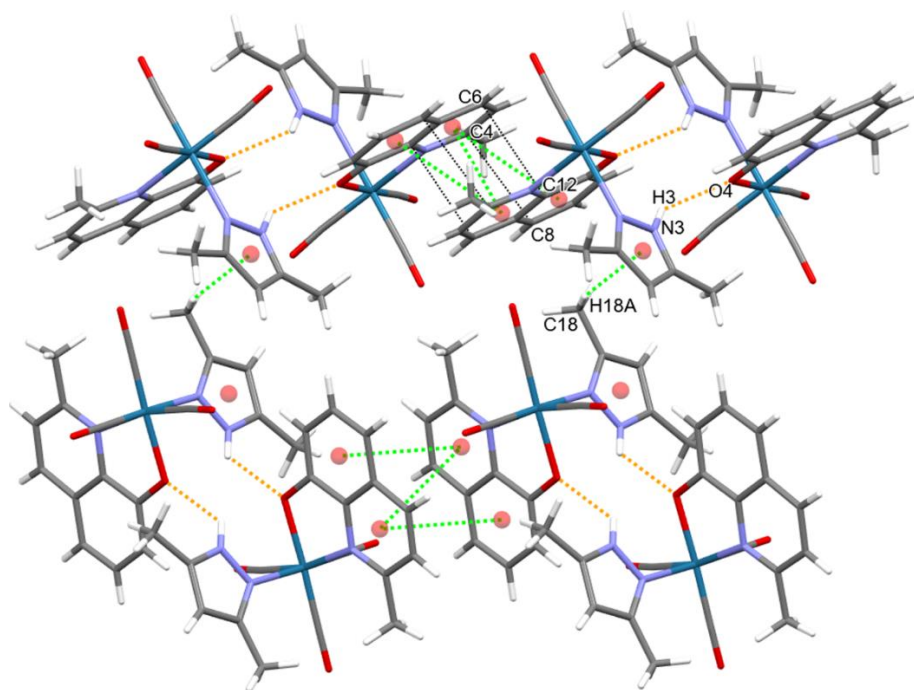

**Figure S10.** Fragment of the crystal structure of **7** showing some intermolecular interactions: hydrogen bonds (orange dotted lines) – 2.914(3) Å (N3–H3...O4<sup>*i*</sup>), the shortest interatomic contacts between rings (black dotted lines) – 3.301(3) Å (C8...C4<sup>*ii*</sup>), 3.347(3) Å (C12...C6<sup>*ii*</sup>), 3.411(4) Å (C8...C5<sup>*ii*</sup>), 3.697 Å (Cg<sub>(Hdmpz)</sub>...C18<sup>*iii*</sup>), and the shortest distances between centroids of rings (green dotted lines) – 3.659 Å (Cg<sub>(py)</sub>...Cg<sup>*ii*</sup><sub>(py)</sub>), 3.733 Å (Cg<sub>(py)</sub>...Cg<sup>*ii*</sup><sub>(be)</sub>), 5.027 Å (Cg<sub>(Hdmpz)</sub>...Cg<sup>*iii*</sup><sub>(Hdmpz)</sub>). (Symmetry codes: (*i*) =  $-x+1, -y+1, -z$ ; (*ii*) =  $-x+2, -y+1, -z$ ; (*iii*) =  $x, -y+1.5, z-0.5$ ).

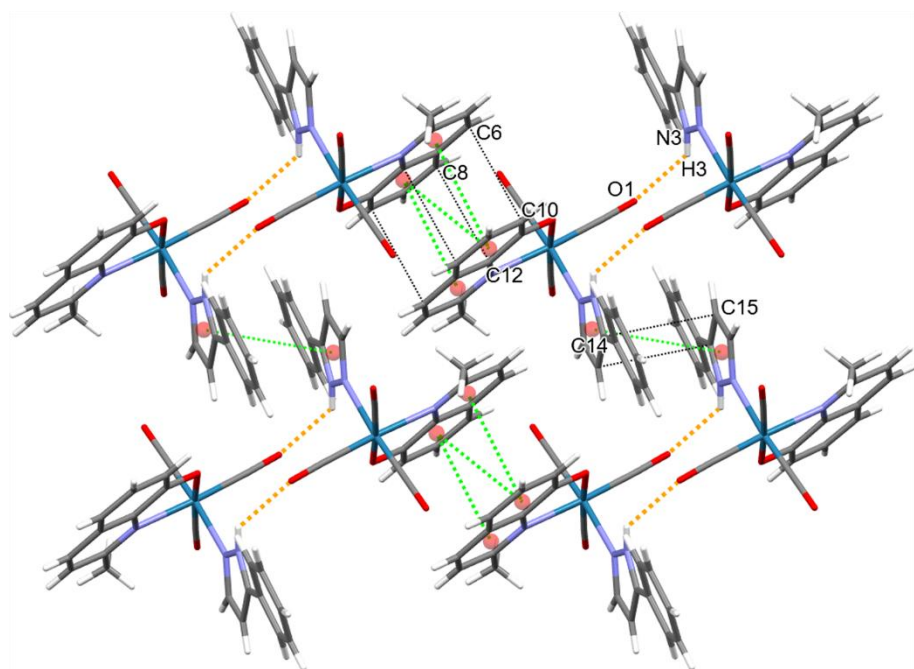

**Figure S11.** Fragment of the crystal structure of **8** showing some intermolecular interactions: hydrogen bonds (orange dotted lines) – 3.008(3) Å (N3–H3...O1<sup>*i*</sup>), the shortest interatomic contacts between rings (black dotted lines) – 3.459(5) Å (C10...C6<sup>*ii*</sup>), 3.478(5) Å (C12...C8<sup>*ii*</sup>), 3.671(4) Å (C14...C15<sup>*iii*</sup>), and the shortest distances between centroids of rings (green dotted lines) – 3.613 Å (Cg<sub>(be)</sub>...Cg<sup>*ii*</sup><sub>(be)</sub>), 3.769 Å (Cg<sub>(py)</sub>...Cg<sup>*ii*</sup><sub>(be)</sub>), 4.058 Å (Cg<sub>(HPhpz)</sub>...Cg<sup>*iii*</sup><sub>(HPhpz)</sub>). (Symmetry codes: (*i*) =  $-x, -y+1, -z+2$ ; (*ii*) =  $-x, -y+1, -z+1$ ; (*iii*) =  $-x+1, -y+1, -z+2$ ).

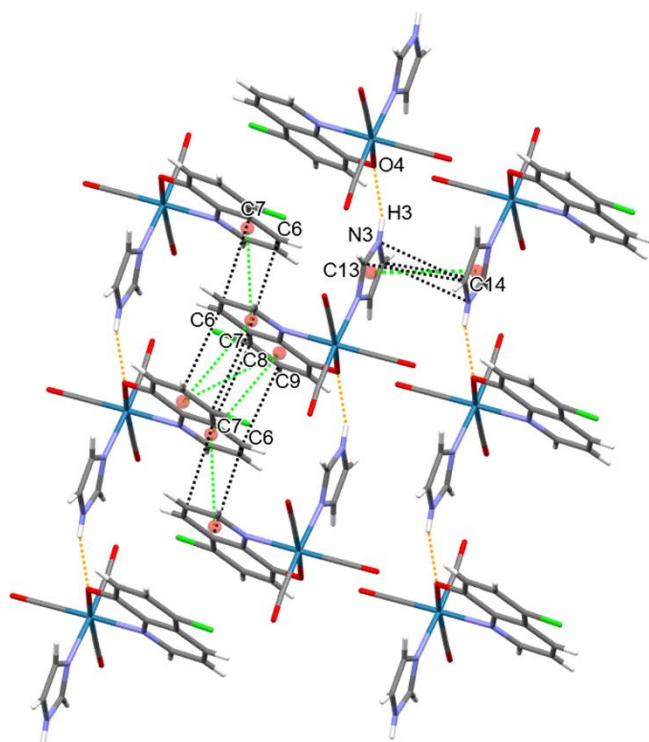

**Figure S12.** Fragment of the crystal structure of **9** showing some intermolecular interactions: hydrogen bonds (orange dotted lines) – 2.751(4) Å (N3–H3···O4<sup>i</sup>), the shortest interatomic contacts between rings (black dotted lines) – 3.407(4) Å (C9···C6<sup>ii</sup>), 3.464(4) Å (C8···C7<sup>ii</sup>), 3.500(4) Å (C6···C7<sup>iii</sup>), 3.738(4) Å (C13···C14<sup>iv</sup>), 3.794(4) Å (N3···C14<sup>iv</sup>), and the shortest distances between centroids of rings (green dotted lines) – 3.897 Å (Cg<sub>(py)</sub>···Cg<sup>ii</sup><sub>(be)</sub>), 3.915 Å (Cg<sub>(py)</sub>···Cg<sup>iii</sup><sub>(py)</sub>), 4.022 Å (Cg<sub>(be)</sub>···Cg<sup>ii</sup><sub>(be)</sub>), 3.878 Å (Cg<sub>(Him)</sub>···Cg<sup>iv</sup><sub>(Him)</sub>). (Symmetry codes: (i) =  $x+1, y, z$ ; (ii) =  $-x, -y, -z$ ; (iii) =  $-x+1, -y, -z$ ; (iv) =  $-x+1, -y, -z+1$ ).

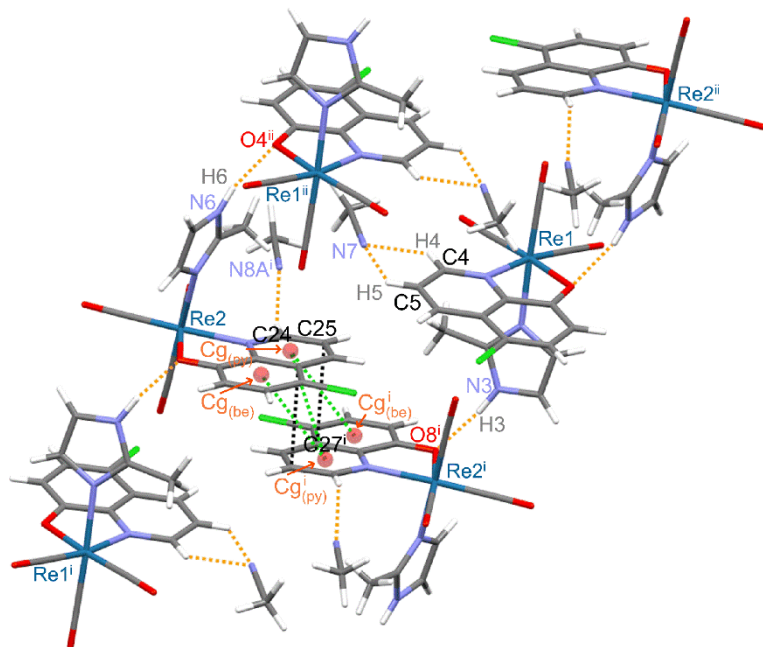

**Figure S13.** Fragment of the crystal structure of **10** showing some intermolecular interactions: hydrogen bonds (orange dotted lines) – 2.750(5) Å (N6–H6···O4<sup>i</sup>), 2.755(6) Å (N3–H3···O8<sup>ii</sup>), 3.217(7) Å (C4–H4···N7), 3.641(7) Å (C5–H5···N7), 3.91(3) Å (C24–H24···N8A<sup>i</sup>), the shortest interatomic contacts between rings (black dotted lines) – 3.331(5) Å (C25···C27<sup>i</sup>), 3.576(5) Å (C24···C27<sup>i</sup>) and the shortest distances between centroids of rings (green dotted lines) – 3.593 Å (Cg<sub>(py)</sub>···Cg<sup>i</sup><sub>(py)</sub>), 4.298 Å (Cg<sub>(py)</sub>···Cg<sup>i</sup><sub>(be)</sub>). (Symmetry codes: (i) =  $-x+1, -y+1, -z+1$ ; (ii) =  $-x, -y+1, -z+1$ ).

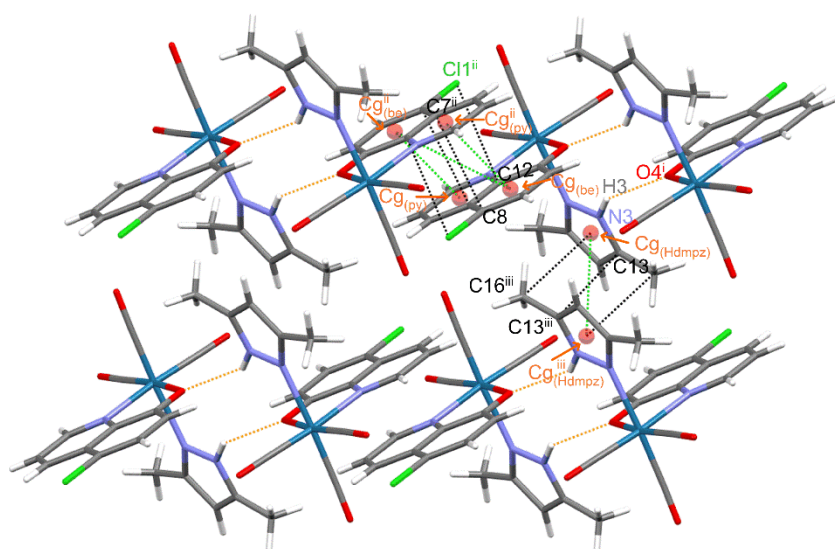

**Figure S14.** Fragment of the crystal structure of **9** showing some intermolecular interactions: hydrogen bonds (orange dotted lines) – 2.751(4) Å (N3–H3···O4<sup>*i*</sup>), the shortest interatomic contacts between rings (black dotted lines) – 3.423(3) Å (C12···C11<sup>*ii*</sup>), 3.445(4) Å (C8···C7<sup>*ii*</sup>), 3.477 Å (Cg<sub>(Hdmpz)</sub>···C16<sup>*iii*</sup>), 3.496(5) Å (C13···C13<sup>*iii*</sup>), and the shortest distances between centroids of rings (green dotted lines) – 4.251 Å (Cg<sub>(be)</sub>···Cg<sup>*ii*</sup><sub>(be)</sub>), 4.371 Å (Cg<sub>(py)</sub>···Cg<sup>*ii*</sup><sub>(py)</sub>), 4.551 Å (Cg<sub>(Hdmpz)</sub>···Cg<sup>*iii*</sup><sub>(Hdmpz)</sub>), 3.878 Å (Cg<sub>(Him)</sub>···Cg<sup>*iv*</sup><sub>(Him)</sub>). (Symmetry codes: (*i*) =  $-x+2, -y, -z+1$ ; (*ii*) =  $-x+2, -y, -z+2$ ; (*iii*) =  $-x+1, -y, -z+1$ ).

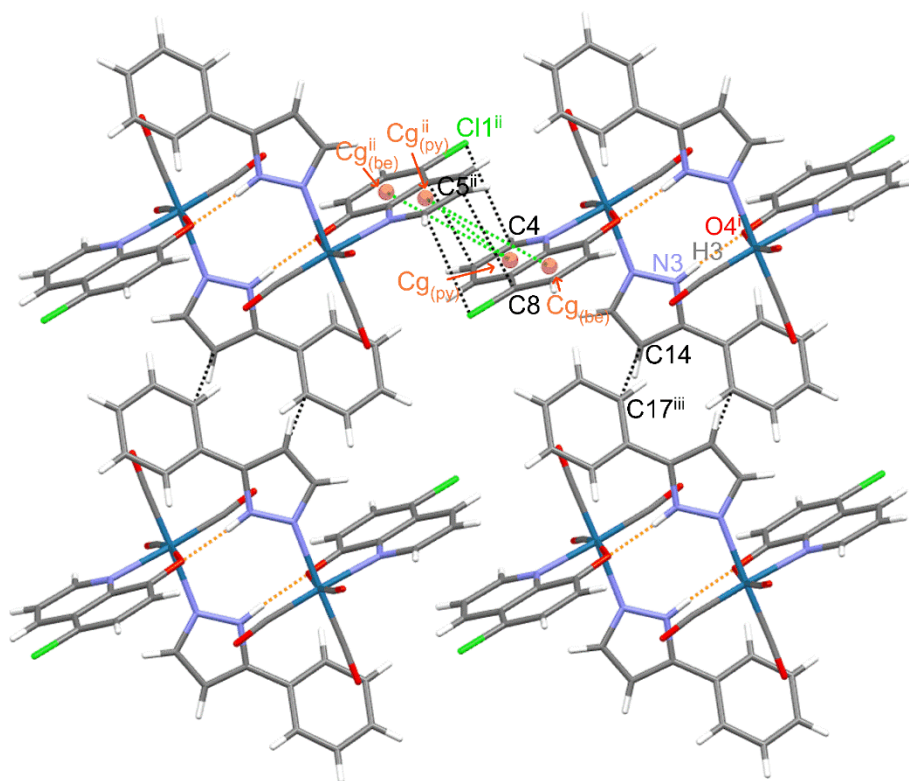

**Figure S15.** Fragment of the crystal structure of **12** showing some intermolecular interactions: hydrogen bonds (orange dotted lines) – 2.719(6) Å (N3–H3···O4<sup>*i*</sup>), the shortest interatomic contacts between rings (black dotted lines) – 3.400(9) Å (C8···C5<sup>*ii*</sup>), 3.411(9) Å (C4···C11<sup>*ii*</sup>), 3.443(5) Å (C14···C17<sup>*iii*</sup>), and the shortest distances between centroids of rings (green dotted lines) – 3.999 Å (Cg<sub>(py)</sub>···Cg<sup>*ii*</sup><sub>(py)</sub>), 4.316 Å (Cg<sub>(py)</sub>···Cg<sup>*ii*</sup><sub>(be)</sub>). (Symmetry codes: (*i*) =  $-x+1, -y+1, -z+1$ ; (*ii*) =  $-x, -y+1, -z+2$ ; (*iii*) =  $-x+1, -y+2, -z+1$ ).

**Table S17.** The shortest contacts between centroids of the adjacent five- and six-membered rings in the crystal structure of studied complexes ( $Cg_{(py)}$  and  $Cg_{(be)}$  – centroids of the pyridine and benzene ring, respectively, in the bidentate ligand;  $Cg_{(Him)}$ ,  $Cg_{(MeHim)}$  and  $Cg_{(Hdmpz)}$  – centroids of the respective monodentate ligand;  $Cg_{(pz-HPhpz)}$  and  $Cg_{(Ph-HPhpz)}$  – centroids of the pyrazole and phenyl part, respectively, in the HPhpz ligand).

| Complex   | interaction                              | distance [Å] |
|-----------|------------------------------------------|--------------|
| <b>1</b>  | $Cg_{(be)} \cdots Cg_{(be)}$             | 3.619        |
|           | $Cg_{(py)} \cdots Cg_{(py)}$             | 3.737        |
|           | $Cg_{(py)} \cdots Cg_{(be)}$             | 3.768        |
|           | $Cg_{(Him)} \cdots Cg_{(Him)}$           | 3.607        |
| <b>2</b>  | $Cg_{(py)} \cdots Cg_{(be)}$             | 3.725        |
|           | $Cg_{(py)} \cdots Cg_{(py)}$             | 3.815        |
|           | $Cg_{(MeHim)} \cdots Cg_{(MeHim)}$       | 4.179        |
| <b>3</b>  | $Cg_{(be)} \cdots Cg_{(be)}$             | 3.690        |
|           | $Cg_{(py)} \cdots Cg_{(be)}$             | 3.963        |
|           | $Cg_{(Hdmpz)} \cdots Cg_{(Hdmpz)}$       | 4.447        |
| <b>4</b>  | $Cg_{(pz-HPhpz)} \cdots Cg_{(Ph-HPhpz)}$ | 5.135        |
| <b>5</b>  | $Cg_{(be)} \cdots Cg_{(be)}$             | 3.636        |
|           | $Cg_{(py)} \cdots Cg_{(be)}$             | 3.688        |
|           | $Cg_{(py)} \cdots Cg_{(py)}$             | 3.660        |
|           | $Cg_{(Him)} \cdots Cg_{(Him)}$           | 3.891        |
| <b>6</b>  | $Cg_{(py)} \cdots Cg_{(be)}$             | 3.722        |
|           | $Cg_{(py)} \cdots Cg_{(py)}$             | 3.810        |
|           | $Cg_{(py)} \cdots Cg_{(py)}$             | 3.931        |
|           | $Cg_{(MeHim)} \cdots Cg_{(MeHim)}$       | 3.467        |
| <b>7</b>  | $Cg_{(py)} \cdots Cg_{(py)}$             | 3.659        |
|           | $Cg_{(py)} \cdots Cg_{(be)}$             | 3.733        |
|           | $Cg_{(Hdmpz)} \cdots Cg_{(Hdmpz)}$       | 5.027        |
| <b>8</b>  | $Cg_{(be)} \cdots Cg_{(be)}$             | 3.613        |
|           | $Cg_{(py)} \cdots Cg_{(be)}$             | 3.769        |
|           | $Cg_{(pz-HPhpz)} \cdots Cg_{(pz-HPhpz)}$ | 4.058        |
|           | $Cg_{(pz-HPhpz)} \cdots Cg_{(Ph-HPhpz)}$ | 4.752        |
| <b>9</b>  | $Cg_{(py)} \cdots Cg_{(be)}$             | 3.897        |
|           | $Cg_{(py)} \cdots Cg_{(py)}$             | 3.915        |
|           | $Cg_{(be)} \cdots Cg_{(be)}$             | 4.022        |
|           | $Cg_{(Him)} \cdots Cg_{(Him)}$           | 3.878        |
| <b>10</b> | $Cg_{(py)} \cdots Cg_{(py)}$             | 3.593        |
|           | $Cg_{(py)} \cdots Cg_{(be)}$             | 4.298        |
| <b>11</b> | $Cg_{(be)} \cdots Cg_{(be)}$             | 4.251        |
|           | $Cg_{(py)} \cdots Cg_{(be)}$             | 4.371        |
|           | $Cg_{(Hdmpz)} \cdots Cg_{(Hdmpz)}$       | 4.551        |
| <b>12</b> | $Cg_{(py)} \cdots Cg_{(py)}$             | 3.999        |
|           | $Cg_{(py)} \cdots Cg_{(be)}$             | 4.316        |
|           | $Cg_{(Ph-HPhpz)} \cdots Cg_{(pz-HPhpz)}$ | 5.230        |

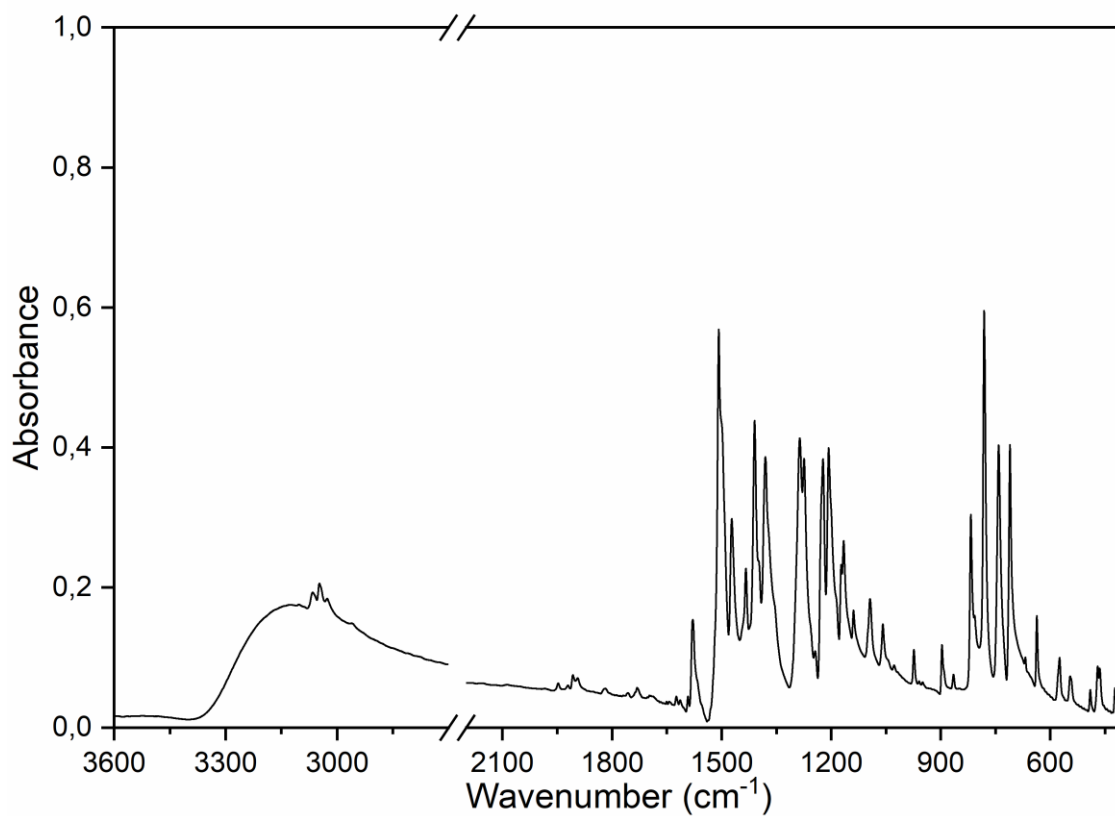

**Fig. S16.** FTIR spectrum of 8-hydroxyquinoline (HQ).

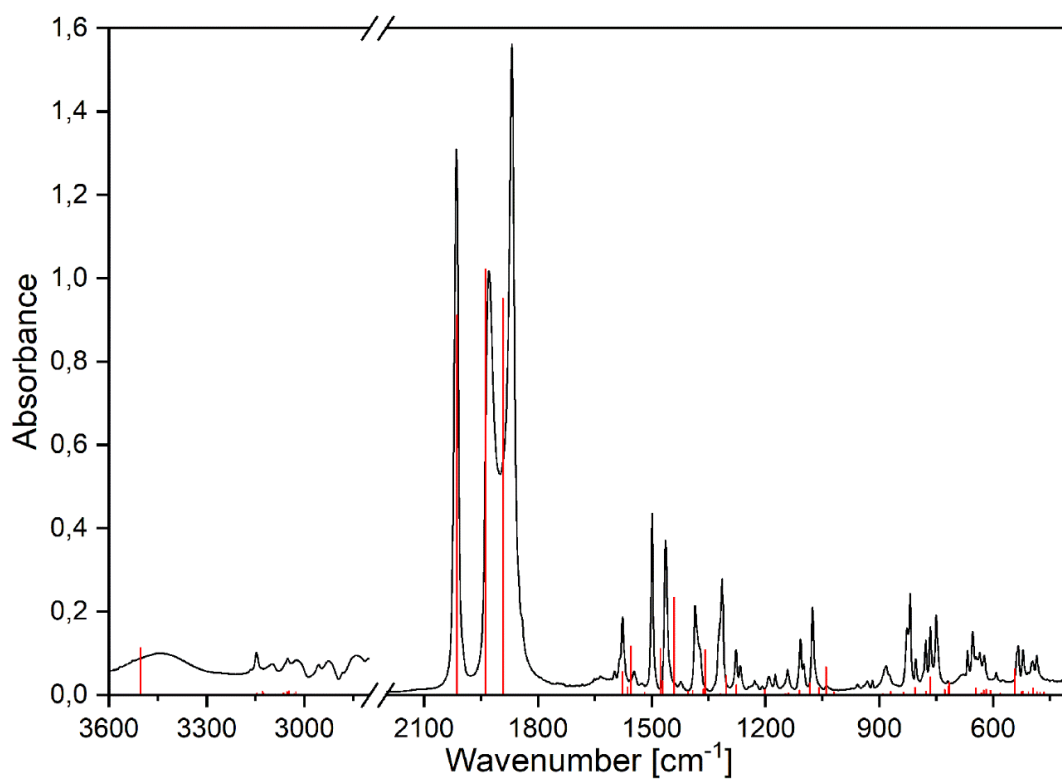

**Fig. S17.** Experimental and PBE0/def2-TZVP simulated (vertical lines) FTIR spectrum of  $[\text{Re}(\text{CO})_3(\text{Q})\text{Him}]$  (**1**).

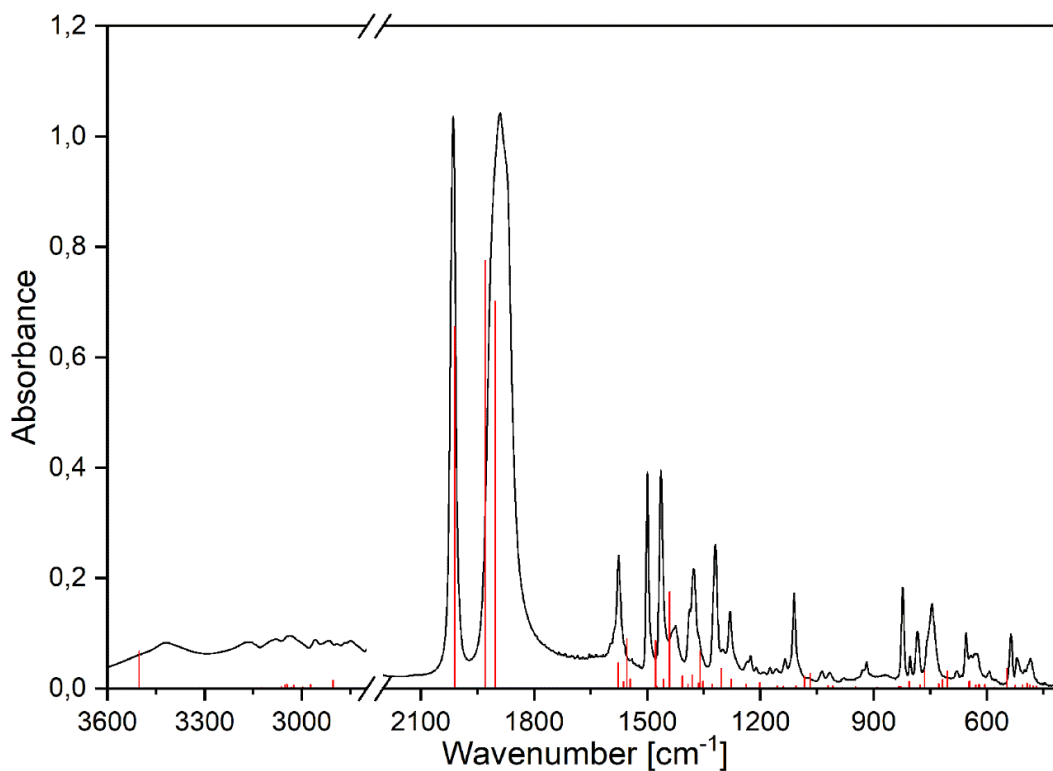

**Fig. S18.** Experimental and PBE0/def2-TZVP simulated (vertical lines) FTIR spectrum of [Re(CO)<sub>3</sub>(Q)MeHim] (**2**).

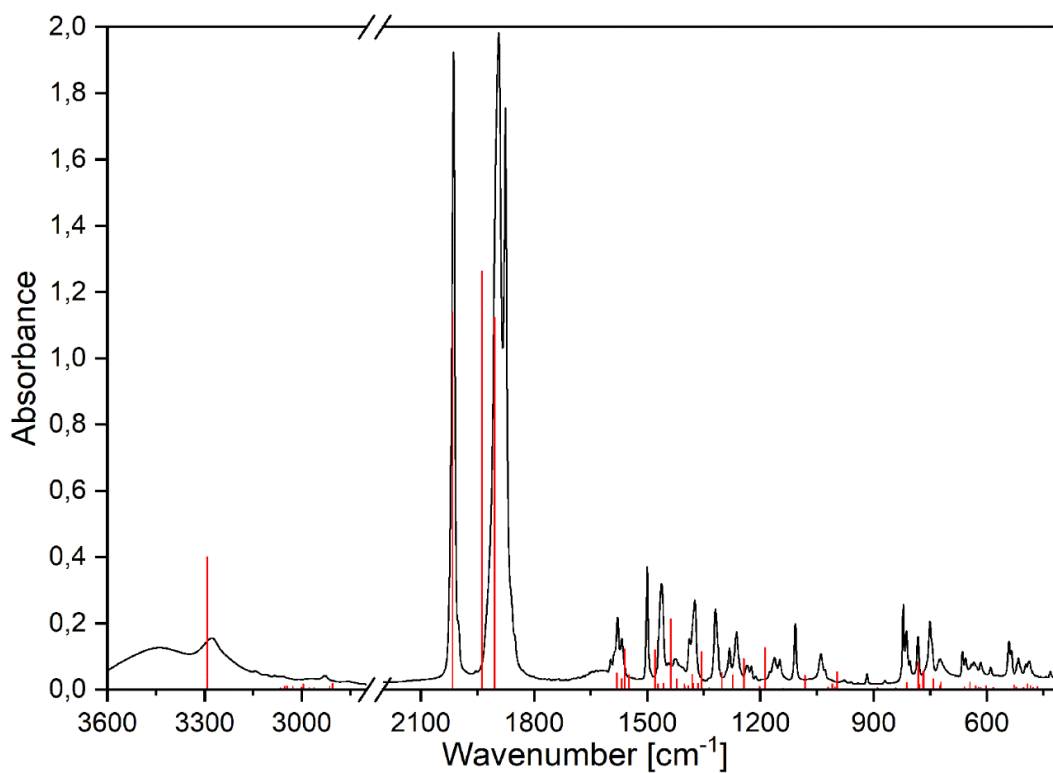

**Fig. S19.** Experimental and PBE0/def2-TZVP simulated (vertical lines) FTIR spectrum of [Re(CO)<sub>3</sub>(Q)Hdmpz] (**3**).

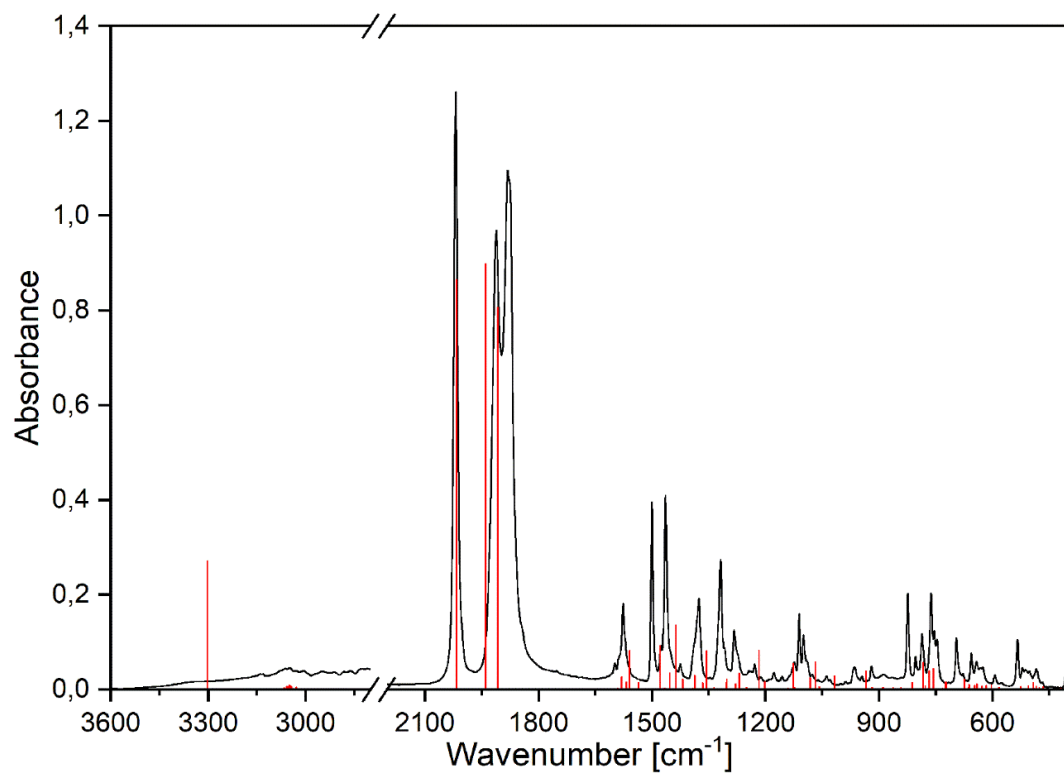

**Fig. S20.** Experimental and PBE0/def2-TZVP simulated (vertical lines) FTIR spectrum of  $[\text{Re}(\text{CO})_3(\text{Q})\text{HPhpz}]$  (**4**).



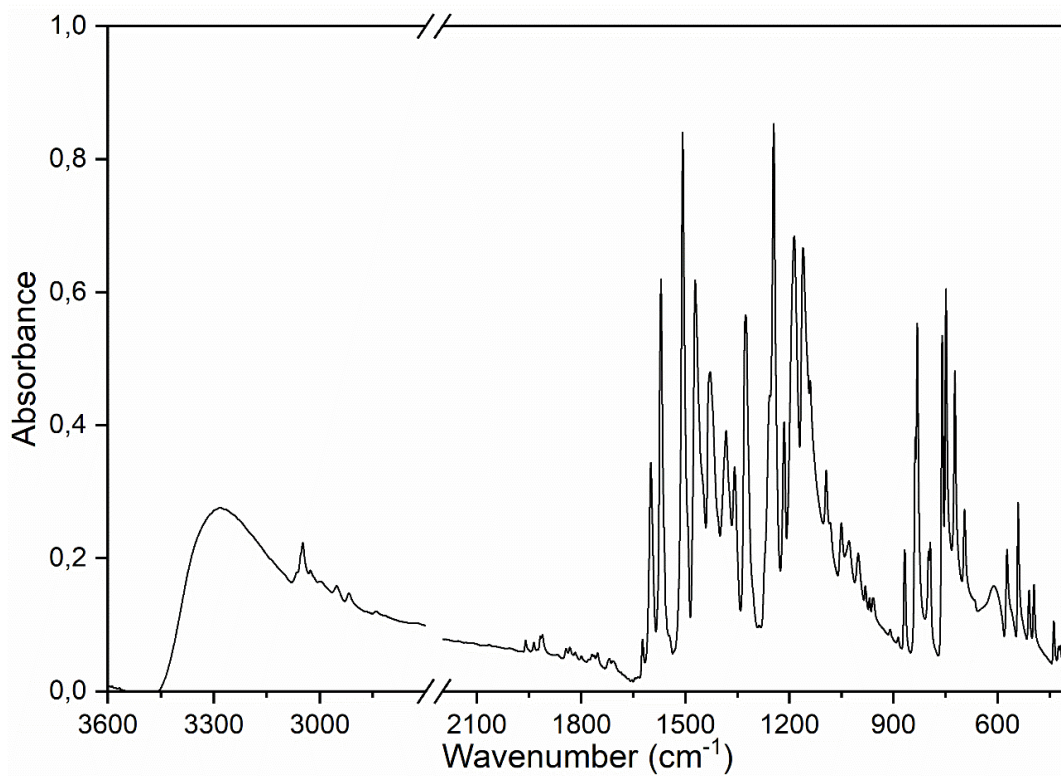

**Fig. S21.** FTIR spectrum of 2-methyl-8-hydroxyquinoline (MeHQ).

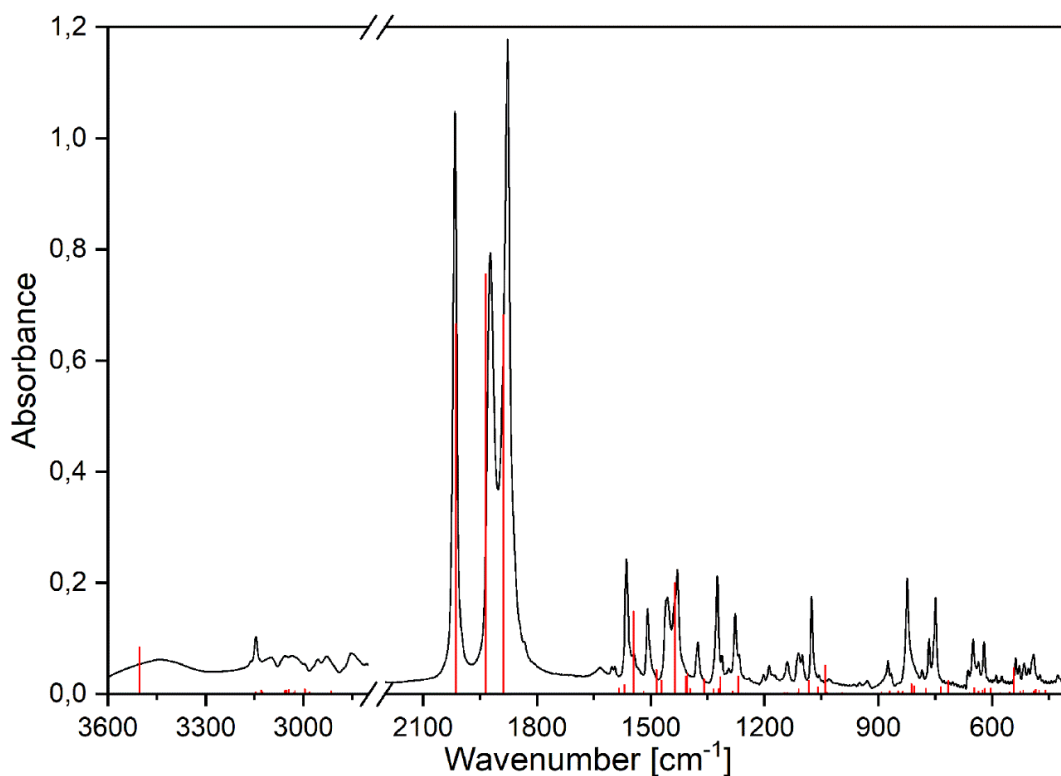

**Fig. S22.** Experimental and PBE0/def2-TZVP simulated (vertical lines) FTIR spectrum of  $[\text{Re}(\text{CO})_3(\text{MeQ})\text{Him}]$  (**5**).



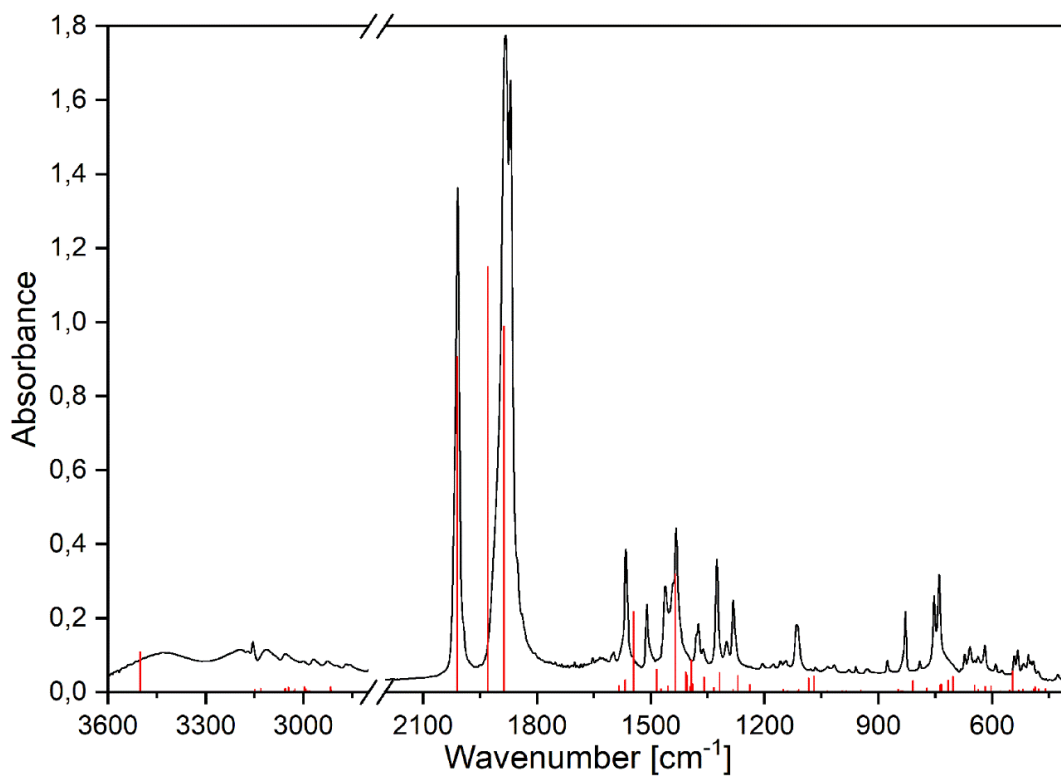

**Fig. S23.** Experimental and PBE0/def2-TZVP simulated (vertical lines) FTIR spectrum of [Re(CO)<sub>3</sub>(MeQ)MeHim] (**6**).

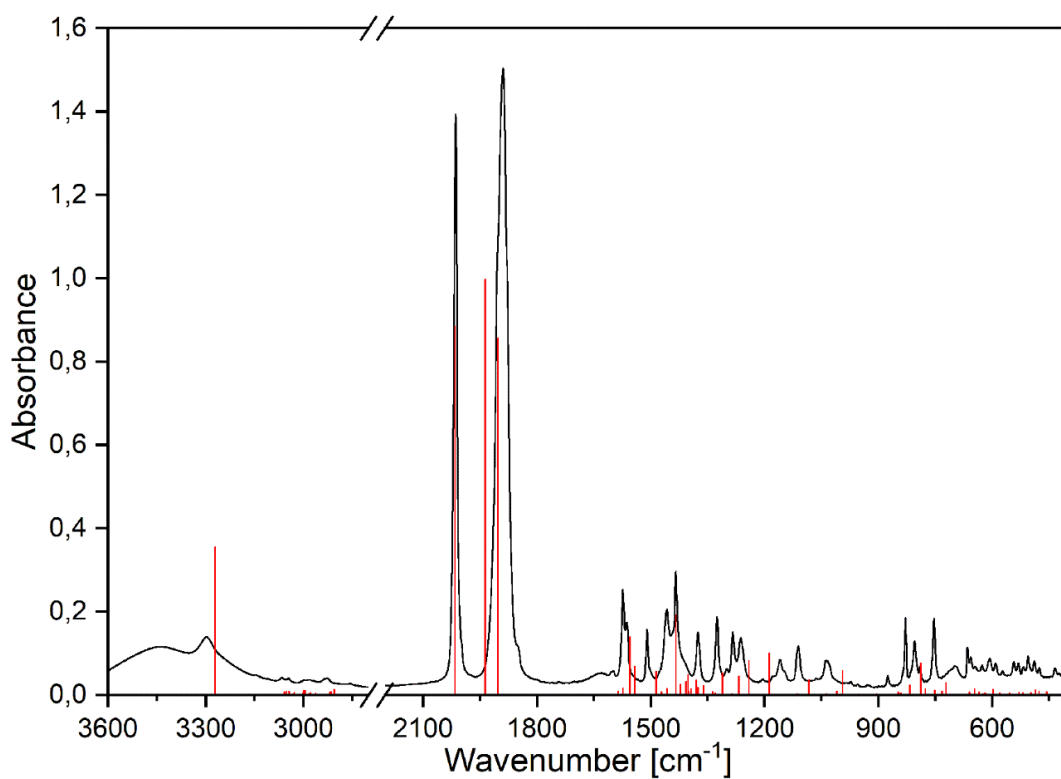

**Fig. S24.** Experimental and PBE0/def2-TZVP simulated (vertical lines) FTIR spectrum of [Re(CO)<sub>3</sub>(MeQ)Hdmpz] (**7**).

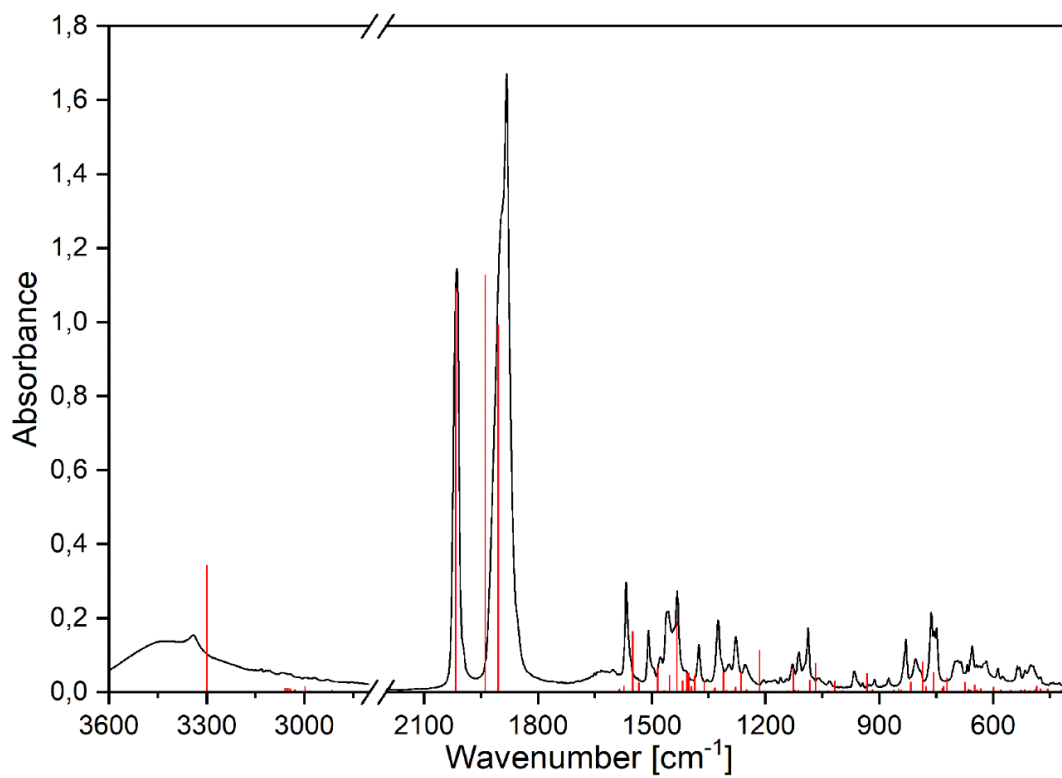

**Fig. S25.** Experimental and PBE0/def2-TZVP simulated (vertical lines) FTIR spectrum of  $[\text{Re}(\text{CO})_3(\text{MeQ})\text{HPhpz}]$  (**8**).

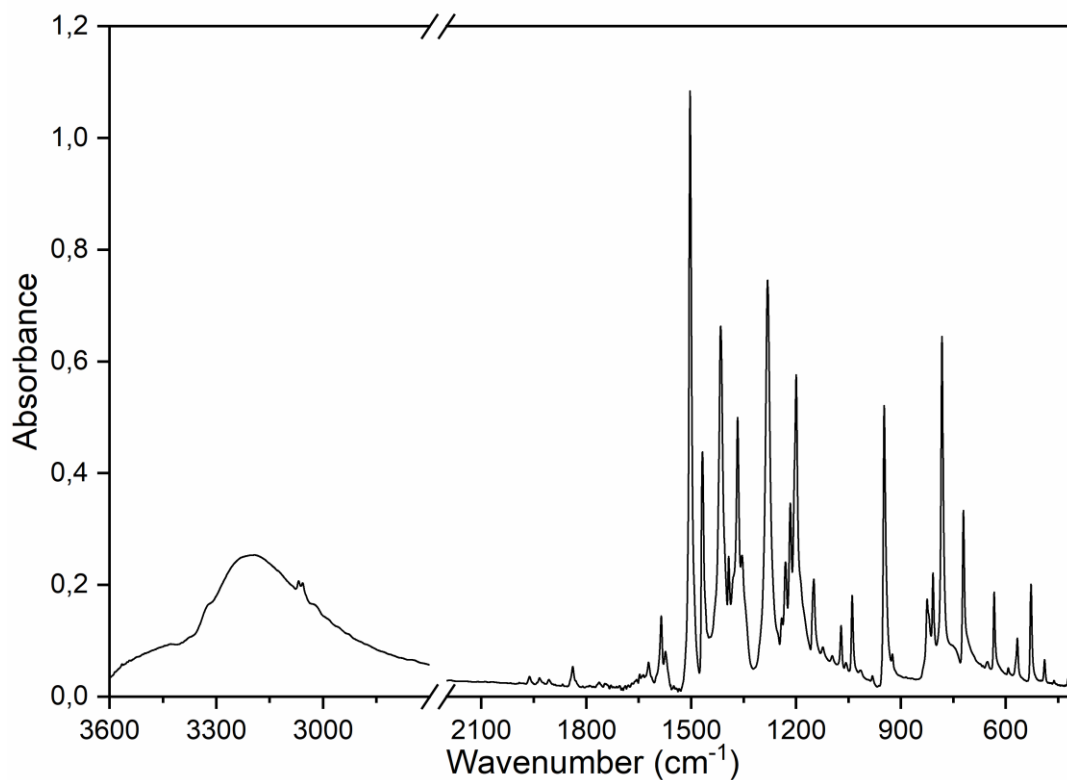

**Fig. S26.** FTIR spectrum of 5-chloro-8-hydroxyquinoline (ClHQ).

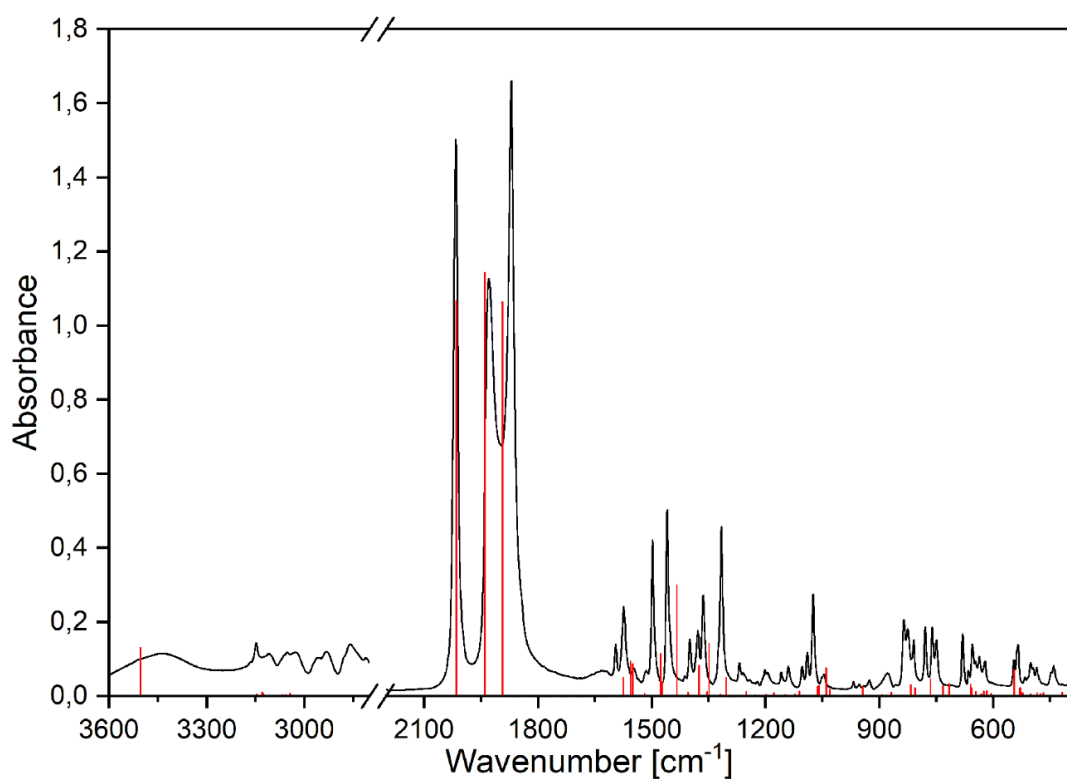

**Fig. S27.** Experimental and PBE0/def2-TZVP simulated (vertical lines) FTIR spectrum of  $[\text{Re}(\text{CO})_3(\text{ClQ})\text{Him}]$  (**9**).

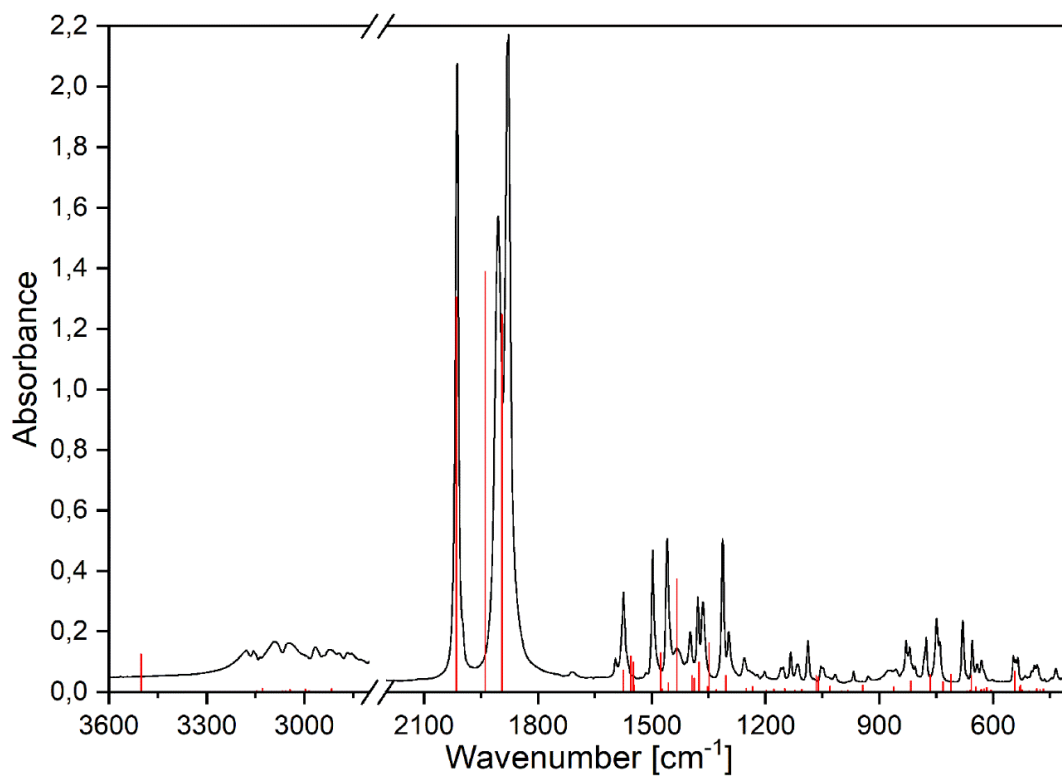

**Fig. S28.** Experimental and PBE0/def2-TZVP simulated (vertical lines) FTIR spectrum of  $[\text{Re}(\text{CO})_3(\text{CIQ})\text{MeHim}]$  (**10**).

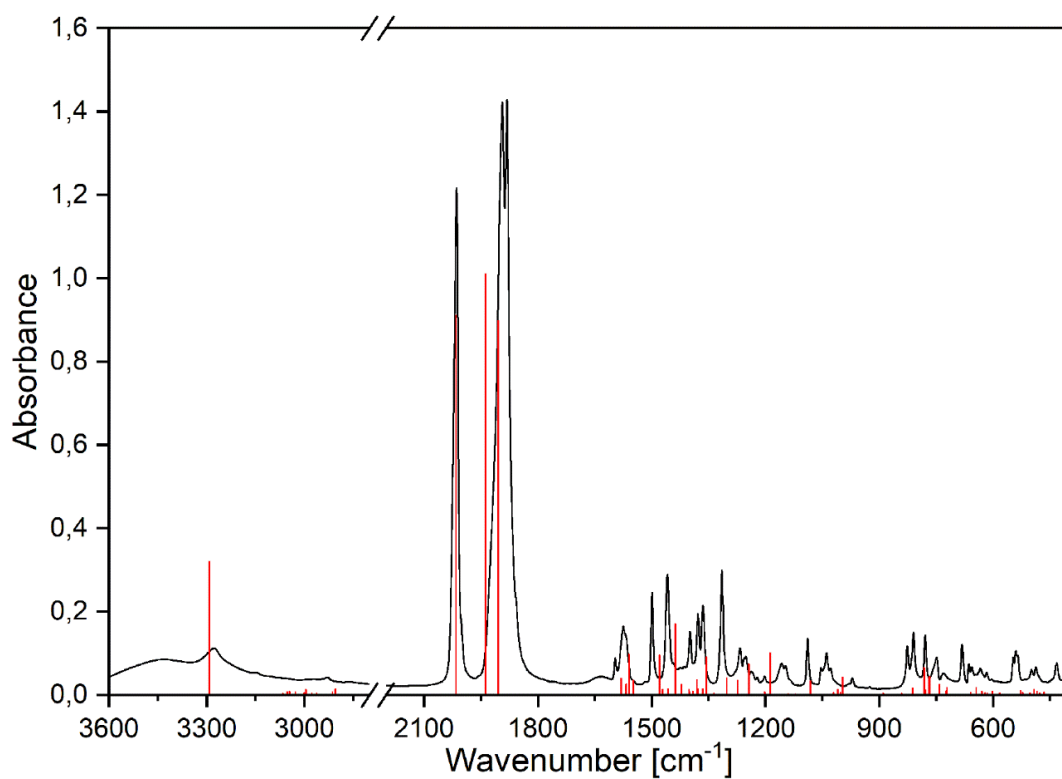

**Fig. S29.** Experimental and PBE0/def2-TZVP simulated (vertical lines) FTIR spectrum of  $[\text{Re}(\text{CO})_3(\text{CIQ})\text{Hdmpz}]$  (**11**).

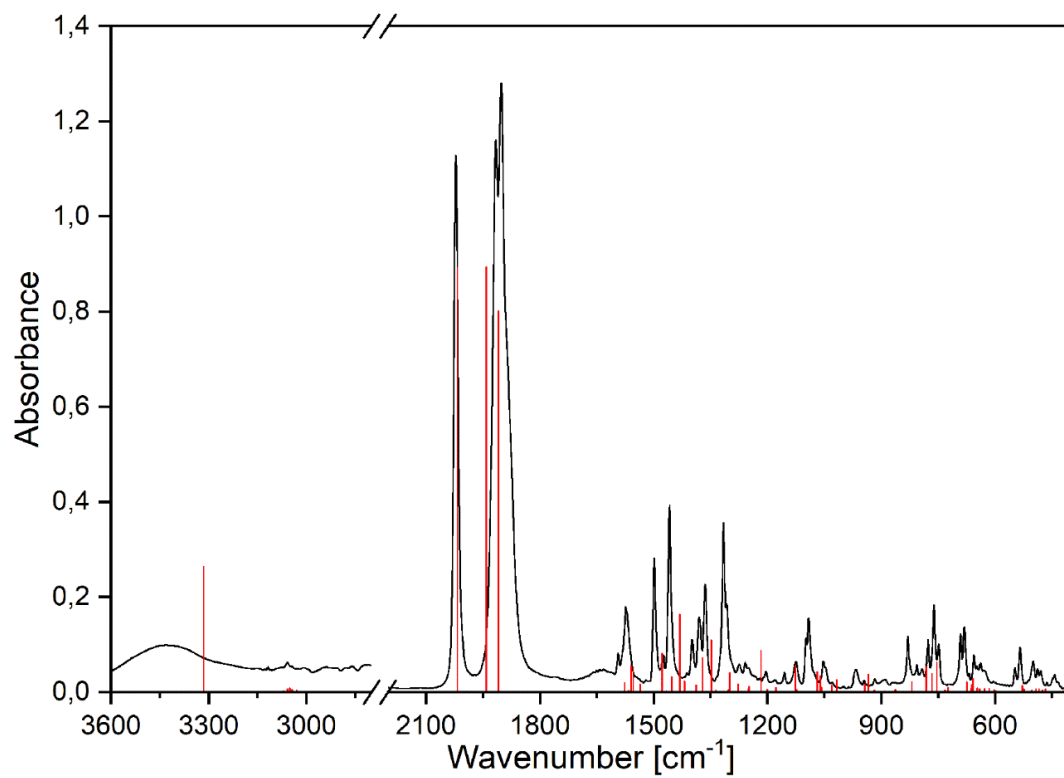

**Fig. S30.** Experimental and PBE0/def2-TZVP simulated (vertical lines) FTIR spectrum of  $[\text{Re}(\text{CO})_3(\text{CIQ})\text{HPhpz}]$  (**12**).

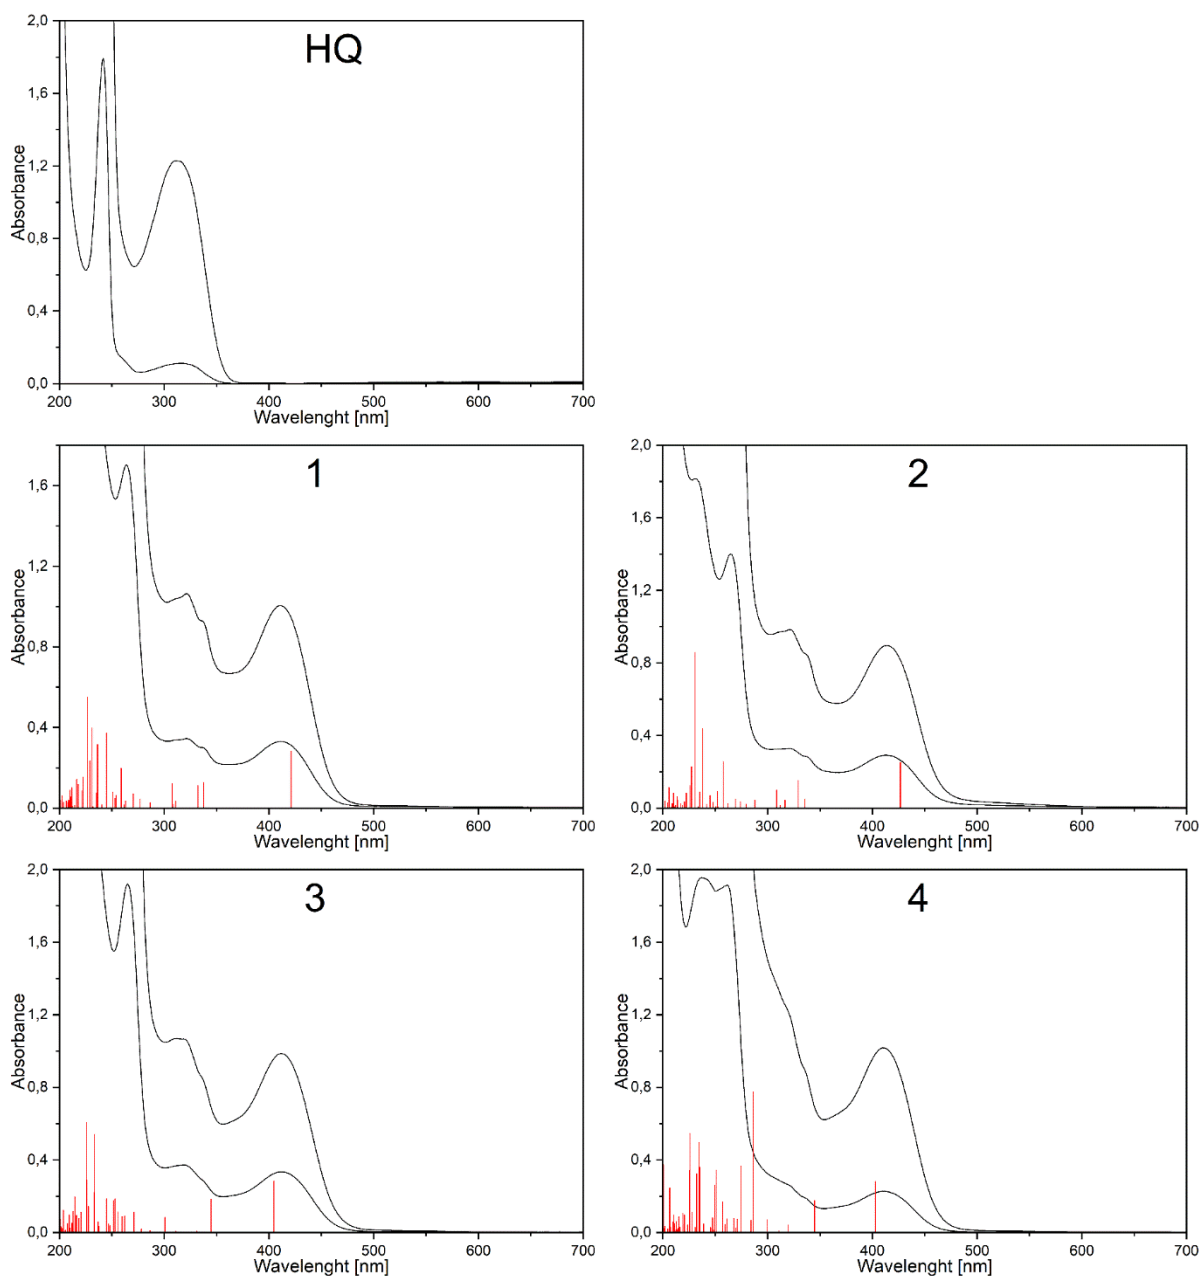

**Fig. S31.** Experimental UV-Vis absorption spectra (black lines) for 8-hydroxyquinoline (HQ) and its studied rhenium(I) complexes (**1–4**) in two different concentrated MeOH solutions. TD-DFT simulated spectra shown as red vertical lines.

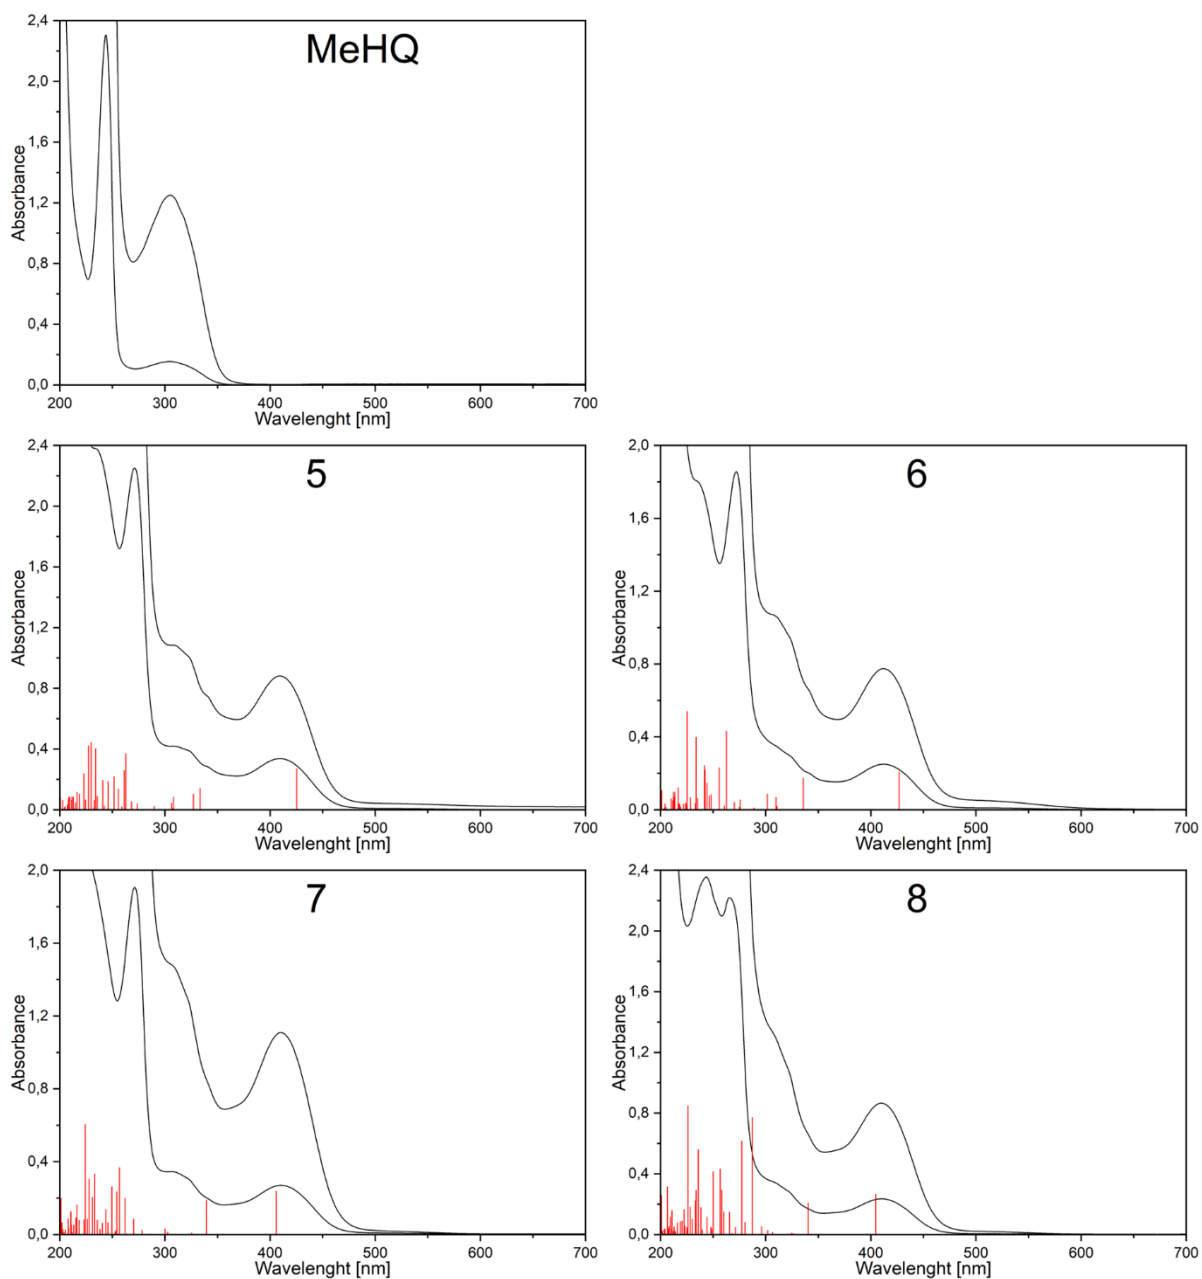

**Fig. S32.** Experimental UV-Vis absorption spectra (black lines) for 2-methyl-8-hydroxyquinoline (MeHQ) and its studied rhenium(I) complexes (**5–8**) in two different concentrated MeOH solutions. TD-DFT simulated spectra shown as red vertical lines.

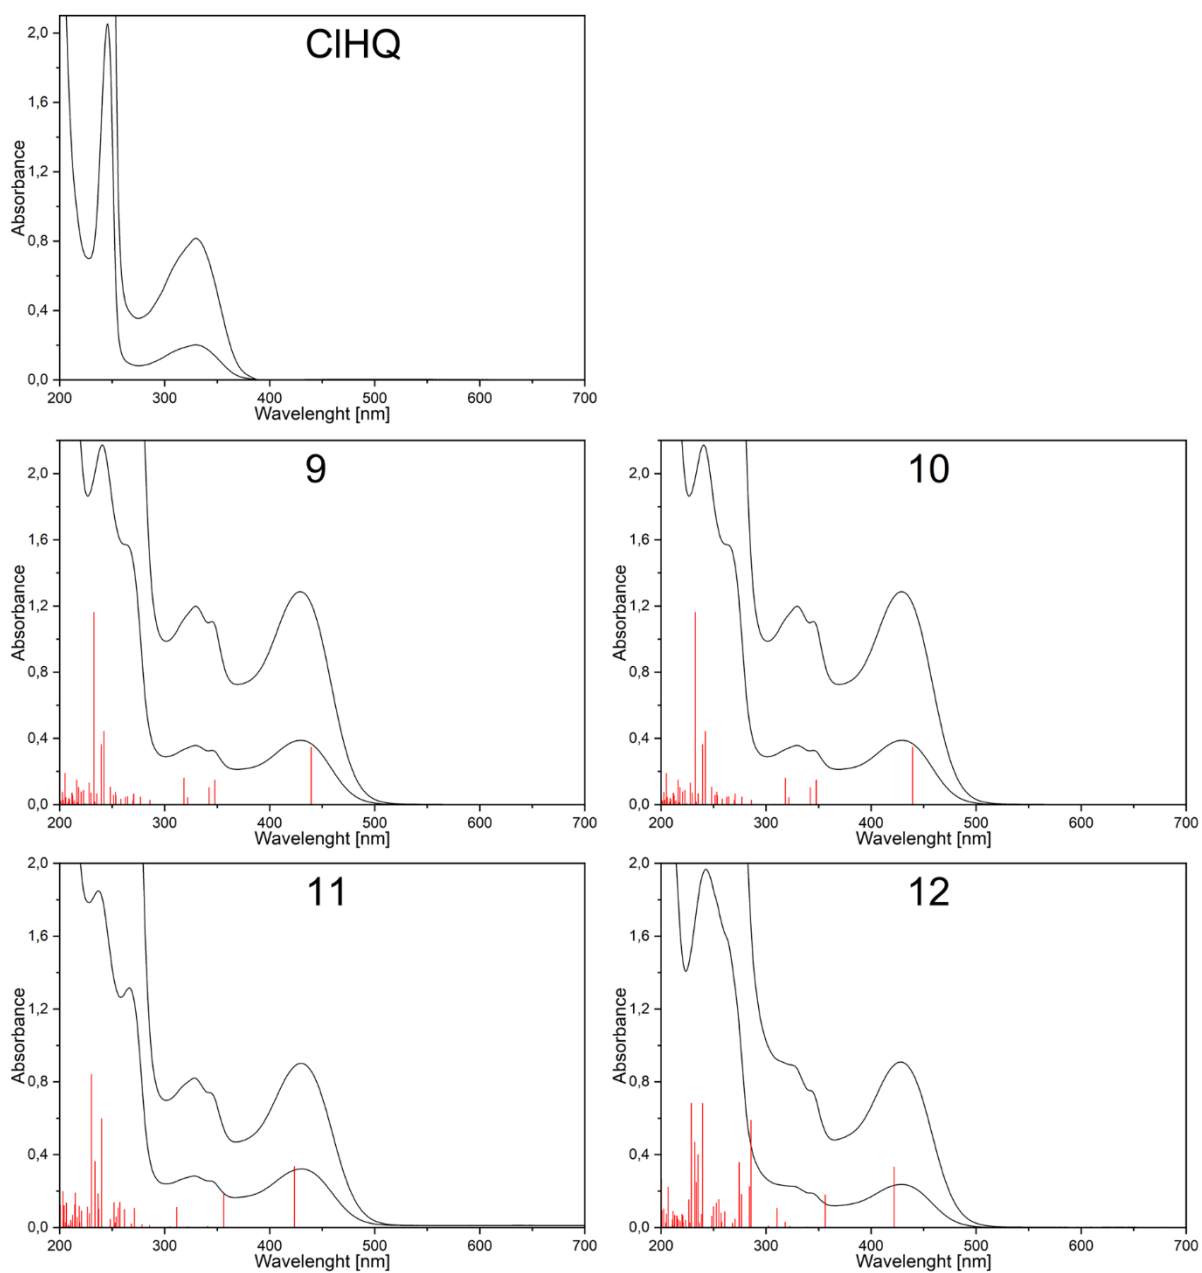

**Fig. S33.** Experimental UV-Vis absorption spectra (black lines) for 5-chloro-8-hydroxyquinoline (CIHQ) and its studied rhenium(I) complexes (**9–12**) in two different concentrated MeOH solutions. TD-DFT simulated spectra shown as red vertical lines.



**Table S18.** The selected experimental and TD-PBE0/def2-TZVP/IEFPCM(methanol) calculated absorptions of the studied rhenium(I) complexes.

| Complex | Calculated     |                     |                                                 | Experimental   |
|---------|----------------|---------------------|-------------------------------------------------|----------------|
|         | $\lambda$ (nm) | Oscillator strength | Main components                                 | $\lambda$ (nm) |
| 1       | 421.09         | 0.0866              | H→L (97.8%)                                     | 411            |
|         | 337.43         | 0.0387              | H-1→L (78.0%)                                   | 337sh          |
|         | 332.14         | 0.0342              | H-2→L (18.8%)<br>H-2→L (78.5%)<br>H-1→L (17.7%) |                |
| 2       | 426.68         | 0.0857              | H→L (98.0%)                                     | 414            |
|         | 335.39         | 0.0164              | H-1→L (63.6%)                                   | 338sh          |
|         | 329.21         | 0.0512              | H-2→L (33.1%)<br>H-2→L (63.9%)<br>H-1→L (30.8%) |                |
| 3       | 404.66         | 0.0922              | H→L (97.0%)                                     | 412            |
|         | 344.52         | 0.0596              | H-1→L (95.3%)                                   | 337sh          |
|         | 330.86         | 0.0025              | H-2→L (97.1%)                                   |                |
| 4       | 402.89         | 0.0911              | H→L (96.6%)                                     | 411            |
|         | 344.74         | 0.0574              | H-1→L (93.9%)                                   | 337sh          |
|         | 330.15         | 0.0011              | H-2→L (97.1%)                                   |                |
| 5       | 425.06         | 0.0730              | H→L (98.3%)                                     | 409            |
|         | 333.24         | 0.0384              | H-1→L (82.4%)                                   | 342sh          |
|         | 326.96         | 0.0278              | H-2→L (13.8%)<br>H-2→L (82.5%)<br>H-1→L (13.0%) |                |
| 6       | 426.92         | 0.0677              | H→L (98.3%)                                     | 412            |
|         | 335.66         | 0.0567              | H-1→L (95.3%)                                   | 342sh          |
|         | 330.72         | 0.0006              | H-2→L (97.4%)                                   |                |
| 7       | 405.64         | 0.0772              | H→L (97.6%)                                     | 410            |
|         | 339.30         | 0.0609              | H-1→L (95.4%)                                   | 323sh          |
|         | 325.27         | 0.0029              | H-2→L (96.0%)                                   |                |
| 8       | 404.73         | 0.0719              | H→L (97.6%)                                     | 410            |
|         | 340.37         | 0.0559              | H-1→L (94.2%)                                   |                |
|         | 325.81         | 0.0017              | H-2→L (94.3%)                                   |                |
| 9       | 439.35         | 0.1025              | H→L (98.0%)                                     | 429            |
|         | 347.72         | 0.0438              | H-1→L (82.3%)                                   | 345sh          |
|         | 342.07         | 0.0303              | H-2→L (14.1%)<br>H-2→L (83.6%)<br>H-1→L (13.2%) |                |
| 10      | 443.56         | 0.0997              | H→L (98.1%)                                     | 433            |
|         | 348.27         | 0.0353              | H-1→L (81.5%)                                   | 346sh          |
|         | 341.98         | 0.0361              | H-2→L (13.9%)<br>H-2→L (82.9%)<br>H-1→L (13.4%) |                |
| 11      | 423.37         | 0.1091              | H→L (97.3%)                                     | 430            |
|         | 356.12         | 0.0609              | H-1→L (95.8%)                                   | 345sh          |
|         | 340.78         | 0.0024              | H-2→L (97.6%)                                   |                |
| 12      | 421.72         | 0.1080              | H→L (97.1%)                                     | 428            |
|         | 356.27         | 0.0583              | H-1→L (94.4%)                                   | 344sh          |
|         | 339.27         | 0.0012              | H-2→L (97.7%)                                   |                |

**Table S19.** Calculated transitions (with a contribution greater than 5%) for [Re(CO)<sub>3</sub>(Q)Him] (**1**)

| Wavelength [nm] | Oscillator strength | Main components | %     |
|-----------------|---------------------|-----------------|-------|
| 421.09          | 0.0866              | HOMO → LUMO     | 97.83 |
| 337.43          | 0.0387              | HOMO-1 → LUMO   | 78.03 |
|                 |                     | HOMO-2 → LUMO   | 18.80 |
| 332.14          | 0.0342              | HOMO-2 → LUMO   | 78.51 |
|                 |                     | HOMO-1 → LUMO   | 17.70 |
| 310.70          | 0.0103              | HOMO-3 → LUMO   | 76.76 |
|                 |                     | HOMO → LUMO+2   | 16.53 |
| 308.76          | 0.0056              | HOMO → LUMO+2   | 61.78 |
|                 |                     | HOMO-3 → LUMO   | 20.76 |
|                 |                     | HOMO-3 → LUMO+2 | 6.01  |
|                 |                     | HOMO → LUMO+1   | 5.22  |
| 307.46          | 0.0369              | HOMO → LUMO+1   | 77.66 |
|                 |                     | HOMO-5 → LUMO   | 12.91 |
|                 |                     | HOMO → LUMO+2   | 6.48  |
| 286.49          | 0.0081              | HOMO → LUMO+3   | 59.73 |
|                 |                     | HOMO-1 → LUMO+2 | 27.49 |
| 276.95          | 0.0138              | HOMO-1 → LUMO+2 | 38.27 |
|                 |                     | HOMO-2 → LUMO+2 | 26.17 |
|                 |                     | HOMO-1 → LUMO+3 | 18.90 |
|                 |                     | HOMO → LUMO+3   | 7.38  |
| 270.33          | 0.0216              | HOMO-2 → LUMO+2 | 25.61 |
|                 |                     | HOMO-1 → LUMO+2 | 21.83 |
|                 |                     | HOMO → LUMO+3   | 20.18 |
|                 |                     | HOMO-1 → LUMO+3 | 13.63 |
| 263.01          | 0.0104              | HOMO-2 → LUMO+3 | 46.02 |
|                 |                     | HOMO-1 → LUMO+3 | 33.93 |
|                 |                     | HOMO-2 → LUMO+4 | 21.73 |
|                 |                     | HOMO-2 → LUMO+2 | 6.88  |
| 261.63          | 0.0049              | HOMO-4 → LUMO   | 99.02 |
| 258.90          | 0.0603              | HOMO-1 → LUMO+1 | 42.21 |
|                 |                     | HOMO-5 → LUMO   | 29.90 |
|                 |                     | HOMO → LUMO+4   | 6.79  |
|                 |                     | HOMO → LUMO+1   | 6.14  |
|                 |                     | HOMO-2 → LUMO+1 | 6.05  |
|                 |                     | HOMO-3 → LUMO+1 | 5.11  |
| 254.11          | 0.0193              | HOMO → LUMO+4   | 29.58 |
|                 |                     | HOMO-2 → LUMO+3 | 19.30 |
|                 |                     | HOMO-1 → LUMO+1 | 9.98  |
|                 |                     | HOMO-1 → LUMO+3 | 9.02  |
|                 |                     | HOMO-2 → LUMO+2 | 8.77  |
| 252.84          | 0.0146              | HOMO-2 → LUMO+3 | 18.15 |
|                 |                     | HOMO-1 → LUMO+1 | 15.85 |
|                 |                     | HOMO-2 → LUMO+2 | 13.31 |
|                 |                     | HOMO-3 → LUMO+2 | 5.78  |
|                 |                     | HOMO-1 → LUMO+3 | 5.93  |
| 250.60          | 0.0244              | HOMO-2 → LUMO+1 | 46.72 |
|                 |                     | HOMO-1 → LUMO+1 | 18.82 |
|                 |                     | HOMO-3 → LUMO+2 | 8.72  |
|                 |                     | HOMO → LUMO+4   | 7.86  |
|                 |                     | HOMO-5 → LUMO   | 7.42  |
| 248.60          | 0.0008              | HOMO-3 → LUMO+2 | 55.03 |
|                 |                     | HOMO-2 → LUMO+1 | 14.42 |
|                 |                     | HOMO → LUMO+4   | 11.84 |
|                 |                     | HOMO → LUMO+2   | 5.57  |
| 244.93          | 0.1134              | HOMO-2 → LUMO+1 | 25.58 |
|                 |                     | HOMO-5 → LUMO   | 20.57 |
|                 |                     | HOMO-3 → LUMO+1 | 16.99 |
|                 |                     | HOMO → LUMO+4   | 10.97 |

|        |        |                  |       |
|--------|--------|------------------|-------|
|        |        | HOMO-1 → LUMO+1  | 9.62  |
|        |        | HOMO-3 → LUMO+2  | 5.10  |
| 240.33 | 0.0053 | HOMO → LUMO+5    | 47.10 |
|        |        | HOMO-3 → LUMO+3  | 16.42 |
|        |        | HOMO → LUMO+6    | 9.93  |
| 236.24 | 0.0961 | HOMO-3 → LUMO+1  | 42.08 |
|        |        | HOMO → LUMO+6    | 15.24 |
|        |        | HOMO-3 → LUMO+3  | 10.66 |
|        |        | HOMO-5 → LUMO    | 10.55 |
|        |        | HOMO → LUMO+5    | 8.07  |
| 235.00 | 0.0230 | HOMO-3 → LUMO+3  | 30.54 |
|        |        | HOMO-1 → LUMO+4  | 11.77 |
|        |        | HOMO → LUMO+6    | 11.71 |
|        |        | HOMO-1 → LUMO+5  | 5.87  |
| 231.87 | 0.0021 | HOMO-6 → LUMO    | 84.67 |
| 230.93 | 0.1212 | HOMO → LUMO+7    | 38.66 |
|        |        | HOMO-6 → LUMO    | 7.54  |
|        |        | HOMO-3 → LUMO+1  | 7.12  |
|        |        | HOMO-3 → LUMO+3  | 5.22  |
| 229.04 | 0.0716 | HOMO-1 → LUMO+4  | 25.12 |
|        |        | HOMO → LUMO+7    | 14.48 |
|        |        | HOMO → LUMO+6    | 12.11 |
|        |        | HOMO-2 → LUMO+4  | 10.16 |
|        |        | HOMO-1 → LUMO+7  | 6.84  |
|        |        | HOMO-2 → LUMO+5  | 5.22  |
| 226.71 | 0.1675 | HOMO → LUMO+6    | 25.93 |
|        |        | HOMO-1 → LUMO+4  | 13.28 |
|        |        | HOMO-3 → LUMO+1  | 9.75  |
|        |        | HOMO → LUMO+5    | 9.17  |
|        |        | HOMO-1 → LUMO+7  | 7.44  |
|        |        | HOMO → LUMO+7    | 6.27  |
|        |        | HOMO-2 → LUMO+4  | 5.12  |
| 222.53 | 0.0470 | HOMO-2 → LUMO+5  | 29.29 |
|        |        | HOMO-2 → LUMO+4  | 23.13 |
|        |        | HOMO-2 → LUMO+7  | 11.41 |
| 221.12 | 0.0261 | HOMO → LUMO+8    | 35.48 |
|        |        | HOMO-2 → LUMO+4  | 9.40  |
|        |        | HOMO → LUMO+10   | 8.84  |
|        |        | HOMO → LUMO+11   | 6.15  |
|        |        | HOMO-3 → LUMO+8  | 5.10  |
| 217.82 | 0.0361 | HOMO-1 → LUMO+7  | 13.04 |
|        |        | HOMO-1 → LUMO+4  | 9.91  |
|        |        | HOMO-2 → LUMO+5  | 8.05  |
|        |        | HOMO-2 → LUMO+8  | 7.75  |
|        |        | HOMO → LUMO+10   | 7.53  |
|        |        | HOMO-1 → LUMO+5  | 6.52  |
|        |        | HOMO → LUMO+8    | 5.60  |
|        |        | HOMO-1 → LUMO+8  | 5.60  |
|        |        | HOMO-3 → LUMO+3  | 5.22  |
| 216.29 | 0.0433 | HOMO-2 → LUMO+4  | 20.08 |
|        |        | HOMO-1 → LUMO+4  | 10.72 |
|        |        | HOMO → LUMO+10   | 9.98  |
|        |        | HOMO-1 → LUMO+5  | 7.77  |
|        |        | HOMO-2 → LUMO+10 | 7.02  |
|        |        | HOMO-2 → LUMO+5  | 5.20  |
|        |        | HOMO → LUMO+7    | 5.14  |
| 214.33 | 0.0036 | HOMO-1 → LUMO+7  | 20.55 |
|        |        | HOMO-1 → LUMO+8  | 15.69 |
|        |        | HOMO-1 → LUMO+4  | 10.99 |
|        |        | HOMO-2 → LUMO+8  | 8.85  |
|        |        | HOMO-1 → LUMO+5  | 7.64  |
| 212.56 | 0.0026 | HOMO-8 → LUMO    | 46.92 |

|        |        |                  |       |
|--------|--------|------------------|-------|
|        |        | HOMO-9 → LUMO    | 24.98 |
|        |        | HOMO-7 → LUMO    | 10.96 |
| 211.52 | 0.0305 | HOMO-3 → LUMO+4  | 42.85 |
|        |        | HOMO-3 → LUMO+5  | 6.38  |
|        |        | HOMO → LUMO+9    | 5.88  |
| 210.86 | 0.0013 | HOMO-4 → LUMO+1  | 20.33 |
|        |        | HOMO-7 → LUMO    | 19.23 |
|        |        | HOMO-5 → LUMO+1  | 11.55 |
|        |        | HOMO-1 → LUMO+5  | 8.07  |
|        |        | HOMO-8 → LUMO    | 6.20  |
|        |        | HOMO-1 → LUMO+10 | 5.17  |
| 210.54 | 0.0169 | HOMO-4 → LUMO+1  | 25.06 |
|        |        | HOMO-1 → LUMO+10 | 18.06 |
|        |        | HOMO-1 → LUMO+6  | 14.42 |
|        |        | HOMO-7 → LUMO    | 8.88  |
|        |        | HOMO-1 → LUMO+5  | 8.82  |
| 209.63 | 0.0272 | HOMO-4 → LUMO+1  | 49.25 |
|        |        | HOMO-7 → LUMO    | 23.85 |
|        |        | HOMO-5 → LUMO+1  | 9.28  |
| 208.65 | 0.0116 | HOMO-4 → LUMO+2  | 18.00 |
|        |        | HOMO-2 → LUMO+10 | 9.09  |
|        |        | HOMO-2 → LUMO+7  | 8.70  |
|        |        | HOMO-3 → LUMO+4  | 7.24  |
|        |        | HOMO → LUMO+8    | 7.17  |
|        |        | HOMO-2 → LUMO+4  | 5.90  |
| 208.35 | 0.0088 | HOMO → LUMO+9    | 66.42 |
|        |        | HOMO-3 → LUMO+4  | 11.90 |
| 207.86 | 0.0086 | HOMO-4 → LUMO+2  | 76.26 |
| 206.35 | 0.0104 | HOMO → LUMO+11   | 25.28 |
|        |        | HOMO → LUMO+8    | 16.40 |
|        |        | HOMO-3 → LUMO+4  | 12.05 |
|        |        | HOMO → LUMO+10   | 8.88  |
|        |        | HOMO → LUMO+9    | 8.47  |
| 203.77 | 0.0091 | HOMO-2 → LUMO+7  | 29.68 |
|        |        | HOMO-1 → LUMO+10 | 13.18 |
|        |        | HOMO-2 → LUMO+11 | 6.83  |
|        |        | HOMO-2 → LUMO+4  | 6.79  |
|        |        | HOMO-2 → LUMO+6  | 6.18  |
|        |        | HOMO → LUMO+11   | 5.46  |
| 202.18 | 0.0189 | HOMO-3 → LUMO+5  | 33.23 |
|        |        | HOMO-3 → LUMO+6  | 11.75 |
|        |        | HOMO-1 → LUMO+10 | 9.51  |
|        |        | HOMO → LUMO+11   | 7.26  |
|        |        | HOMO-3 → LUMO+4  | 6.33  |
| 200.75 | 0.0119 | HOMO-4 → LUMO+3  | 47.23 |
|        |        | HOMO-2 → LUMO+6  | 30.24 |
|        |        | HOMO → LUMO+10   | 10.14 |
|        |        | HOMO-1 → LUMO+6  | 6.10  |

**Table S20.** Calculated transitions (with a contribution greater than 5%) for [Re(CO)<sub>3</sub>(Q)MeHim] (**2**)

| Wavelength [nm] | Oscillator strength | Main components | %     |
|-----------------|---------------------|-----------------|-------|
| 426.68          | 0.0857              | HOMO → LUMO     | 98.02 |
| 335.39          | 0.0164              | HOMO-1 → LUMO   | 63.60 |
|                 |                     | HOMO-2 → LUMO   | 33.09 |
| 329.21          | 0.0512              | HOMO-2 → LUMO   | 63.85 |
|                 |                     | HOMO-1 → LUMO   | 30.78 |
| 316.51          | 0.0147              | HOMO-3 → LUMO   | 93.31 |
| 311.97          | 0.0050              | HOMO → LUMO+2   | 70.34 |
|                 |                     | HOMO → LUMO+1   | 11.47 |
|                 |                     | HOMO-3 → LUMO+2 | 5.91  |
| 308.70          | 0.0337              | HOMO → LUMO+1   | 72.26 |
|                 |                     | HOMO-5 → LUMO   | 11.58 |
|                 |                     | HOMO → LUMO+2   | 11.34 |
| 287.78          | 0.0145              | HOMO → LUMO+3   | 71.25 |
|                 |                     | HOMO-1 → LUMO+2 | 13.06 |
| 279.36          | 0.0072              | HOMO-4 → LUMO   | 96.71 |
| 273.87          | 0.0120              | HOMO-1 → LUMO+2 | 42.63 |
|                 |                     | HOMO-2 → LUMO+2 | 34.05 |
|                 |                     | HOMO-1 → LUMO+3 | 6.57  |
| 269.04          | 0.0171              | HOMO-1 → LUMO+2 | 26.92 |
|                 |                     | HOMO-2 → LUMO+2 | 24.33 |
|                 |                     | HOMO-1 → LUMO+3 | 18.64 |
|                 |                     | HOMO → LUMO+3   | 10.23 |
|                 |                     | HOMO → LUMO+2   | 5.18  |
| 261.91          | 0.0080              | HOMO-1 → LUMO+3 | 45.79 |
|                 |                     | HOMO-2 → LUMO+3 | 31.19 |
|                 |                     | HOMO-2 → LUMO+2 | 6.90  |
|                 |                     | HOMO-3 → LUMO+3 | 5.51  |
| 257.65          | 0.0868              | HOMO-5 → LUMO   | 42.20 |
|                 |                     | HOMO-1 → LUMO+1 | 19.44 |
|                 |                     | HOMO-2 → LUMO+1 | 15.42 |
|                 |                     | HOMO-3 → LUMO+1 | 10.21 |
|                 |                     | HOMO → LUMO+1   | 7.61  |
| 252.23          | 0.0031              | HOMO-3 → LUMO+2 | 55.63 |
|                 |                     | HOMO → LUMO+4   | 20.49 |
|                 |                     | HOMO → LUMO+2   | 6.59  |
| 251.94          | 0.0309              | HOMO-2 → LUMO+3 | 45.12 |
|                 |                     | HOMO-2 → LUMO+2 | 13.26 |
|                 |                     | HOMO-1 → LUMO+3 | 9.70  |
|                 |                     | HOMO → LUMO+5   | 6.69  |
| 250.42          | 0.0033              | HOMO-1 → LUMO+1 | 68.27 |
|                 |                     | HOMO-2 → LUMO+1 | 22.37 |
| 247.74          | 0.0111              | HOMO → LUMO+4   | 58.88 |
|                 |                     | HOMO-3 → LUMO+2 | 18.16 |

|        |        |                 |       |
|--------|--------|-----------------|-------|
|        |        | HOMO-3 → LUMO+3 | 6.03  |
| 244.95 | 0.0239 | HOMO-2 → LUMO+1 | 49.11 |
|        |        | HOMO-3 → LUMO+1 | 24.00 |
|        |        | HOMO-5 → LUMO   | 8.66  |
|        |        | HOMO-1 → LUMO+1 | 6.87  |
| 241.64 | 0.0070 | HOMO → LUMO+5   | 40.49 |
|        |        | HOMO-3 → LUMO+1 | 11.71 |
|        |        | HOMO-3 → LUMO+3 | 9.65  |
|        |        | HOMO → LUMO+6   | 9.23  |
| 237.97 | 0.1483 | HOMO-3 → LUMO+1 | 29.39 |
|        |        | HOMO → LUMO+6   | 25.05 |
|        |        | HOMO-5 → LUMO   | 16.55 |
|        |        | HOMO → LUMO+5   | 5.83  |
| 235.01 | 0.0302 | HOMO-3 → LUMO+3 | 47.73 |
|        |        | HOMO-2 → LUMO+5 | 7.64  |
|        |        | HOMO → LUMO+6   | 5.98  |
| 233.43 | 0.0031 | HOMO-6 → LUMO   | 91.04 |
| 230.57 | 0.2924 | HOMO → LUMO+6   | 19.55 |
|        |        | HOMO-3 → LUMO+1 | 16.09 |
|        |        | HOMO → LUMO+5   | 12.25 |
|        |        | HOMO → LUMO+7   | 10.50 |
|        |        | HOMO-5 → LUMO   | 9.59  |
| 227.22 | 0.0773 | HOMO-1 → LUMO+4 | 20.44 |
|        |        | HOMO → LUMO+7   | 18.45 |
|        |        | HOMO-2 → LUMO+5 | 8.91  |
|        |        | HOMO → LUMO+9   | 8.84  |
|        |        | HOMO → LUMO+6   | 8.83  |
| 225.83 | 0.0424 | HOMO-1 → LUMO+4 | 23.73 |
|        |        | HOMO → LUMO+7   | 13.61 |
|        |        | HOMO-2 → LUMO+4 | 9.81  |
|        |        | HOMO-1 → LUMO+5 | 9.75  |
|        |        | HOMO → LUMO+6   | 6.00  |
|        |        | HOMO-1 → LUMO+7 | 5.39  |
| 222.22 | 0.0273 | HOMO-2 → LUMO+4 | 36.53 |
|        |        | HOMO → LUMO+7   | 11.58 |
|        |        | HOMO-1 → LUMO+4 | 7.61  |
| 220.76 | 0.0075 | HOMO → LUMO+9   | 27.91 |
|        |        | HOMO → LUMO+7   | 9.91  |
|        |        | HOMO → LUMO+8   | 9.56  |
|        |        | HOMO → LUMO+10  | 7.33  |
|        |        | HOMO → LUMO+11  | 7.26  |
|        |        | HOMO-3 → LUMO+9 | 6.57  |
| 220.45 | 0.0121 | HOMO-4 → LUMO+1 | 89.88 |
|        |        | HOMO-4 → LUMO+2 | 6.11  |
| 218.42 | 0.0042 | HOMO-4 → LUMO+2 | 82.90 |
|        |        | HOMO-4 → LUMO+1 | 6.91  |

|        |        |                  |       |
|--------|--------|------------------|-------|
| 217.23 | 0.0078 | HOMO-2 → LUMO+5  | 25.30 |
|        |        | HOMO-2 → LUMO+4  | 11.94 |
|        |        | HOMO → LUMO+7    | 11.34 |
|        |        | HOMO → LUMO+10   | 10.82 |
| 213.82 | 0.0150 | HOMO → LUMO+10   | 22.70 |
|        |        | HOMO → LUMO+10   | 13.26 |
|        |        | HOMO-2 → LUMO+6  | 6.57  |
|        |        | HOMO-1 → LUMO+6  | 5.44  |
|        |        | HOMO-2 → LUMO+5  | 5.39  |
|        |        | HOMO-5 → LUMO+1  | 5.35  |
| 213.27 | 0.0218 | HOMO-1 → LUMO+5  | 18.05 |
|        |        | HOMO → LUMO+9    | 11.00 |
|        |        | HOMO → LUMO+7    | 8.52  |
|        |        | HOMO-3 → LUMO+4  | 8.45  |
|        |        | HOMO-4 → LUMO+3  | 8.15  |
|        |        | HOMO-2 → LUMO+9  | 5.41  |
| 211.90 | 0.0053 | HOMO-9 → LUMO    | 57.37 |
|        |        | HOMO-8 → LUMO    | 29.87 |
|        |        | HOMO-7 → LUMO    | 5.42  |
| 210.61 | 0.0026 | HOMO → LUMO+8    | 61.88 |
|        |        | HOMO → LUMO+9    | 10.62 |
| 210.10 | 0.0277 | HOMO-7 → LUMO    | 49.49 |
|        |        | HOMO-5 → LUMO+1  | 13.58 |
|        |        | HOMO → LUMO+8    | 8.15  |
| 209.30 | 0.0072 | HOMO-4 → LUMO+3  | 53.70 |
|        |        | HOMO-1 → LUMO+5  | 7.83  |
|        |        | HOMO-7 → LUMO    | 6.11  |
| 208.88 | 0.0082 | HOMO-4 → LUMO+3  | 18.60 |
|        |        | HOMO-3 → LUMO+5  | 16.33 |
|        |        | HOMO → LUMO+11   | 9.99  |
|        |        | HOMO-1 → LUMO+6  | 8.24  |
|        |        | HOMO-3 → LUMO+4  | 7.81  |
|        |        | HOMO-1 → LUMO+5  | 6.09  |
| 207.70 | 0.0014 | HOMO-1 → LUMO+10 | 5.07  |
|        |        | HOMO-3 → LUMO+5  | 13.64 |
|        |        | HOMO-3 → LUMO+4  | 11.90 |
|        |        | HOMO-1 → LUMO+9  | 9.99  |
|        |        | HOMO-3 → LUMO+6  | 9.08  |
|        |        | HOMO-2 → LUMO+5  | 8.19  |
| 205.86 | 0.0381 | HOMO-2 → LUMO+4  | 5.43  |
|        |        | HOMO-3 → LUMO+4  | 38.59 |
|        |        | HOMO-1 → LUMO+9  | 14.18 |
|        |        | HOMO → LUMO+11   | 13.98 |
|        |        | HOMO → LUMO+10   | 7.46  |
| 204.44 | 0.0096 | HOMO → LUMO+9    | 5.63  |
|        |        | HOMO-1 → LUMO+9  | 18.72 |

|        |        |                  |       |
|--------|--------|------------------|-------|
|        |        | HOMO-1 → LUMO+7  | 18.32 |
|        |        | HOMO-1 → LUMO+4  | 17.16 |
|        |        | HOMO → LUMO+11   | 8.30  |
|        |        | HOMO-3 → LUMO+5  | 6.31  |
| 201.83 | 0.0133 | HOMO → LUMO+11   | 22.32 |
|        |        | HOMO-1 → LUMO+7  | 14.63 |
|        |        | HOMO-3 → LUMO+5  | 10.38 |
|        |        | HOMO-1 → LUMO+11 | 7.25  |
|        |        | HOMO-1 → LUMO+4  | 6.32  |
|        |        | HOMO-2 → LUMO+11 | 6.26  |
| 200.18 | 0.0370 | HOMO-1 → LUMO+6  | 18.98 |
|        |        | HOMO → LUMO+11   | 11.80 |
|        |        | HOMO → LUMO+13   | 10.61 |
|        |        | HOMO-1 → LUMO+7  | 8.37  |



**Table S21.** Calculated transitions (with a contribution greater than 5%) for [Re(CO)<sub>3</sub>(Q)Hdmpz] (**3**)

| Wavelength [nm] | Oscillator strength | Main components | %     |
|-----------------|---------------------|-----------------|-------|
| 404.66          | 0.0922              | HOMO → LUMO     | 96.95 |
| 344.52          | 0.0596              | HOMO-1 → LUMO   | 95.29 |
| 330.86          | 0.0025              | HOMO-2 → LUMO   | 97.09 |
| 310.87          | 0.0026              | HOMO-3 → LUMO   | 94.17 |
| 305.06          | 0.0006              | HOMO → LUMO+2   | 73.07 |
|                 |                     | HOMO-3 → LUMO+2 | 7.43  |
|                 |                     | HOMO-1 → LUMO+2 | 5.94  |
| 300.63          | 0.0267              | HOMO → LUMO+1   | 74.73 |
|                 |                     | HOMO-5 → LUMO   | 16.69 |
| 286.43          | 0.0030              | HOMO-1 → LUMO+2 | 58.49 |
|                 |                     | HOMO → LUMO+3   | 25.25 |
| 278.06          | 0.0064              | HOMO-1 → LUMO+3 | 39.35 |
|                 |                     | HOMO-2 → LUMO+2 | 24.07 |
|                 |                     | HOMO → LUMO+3   | 18.29 |
| 270.92          | 0.0364              | HOMO → LUMO+3   | 42.57 |
|                 |                     | HOMO-2 → LUMO+2 | 20.00 |
|                 |                     | HOMO-1 → LUMO+2 | 18.26 |
| 262.15          | 0.0292              | HOMO-2 → LUMO+3 | 35.18 |
|                 |                     | HOMO-1 → LUMO+3 | 18.87 |
|                 |                     | HOMO-2 → LUMO+2 | 10.05 |
|                 |                     | HOMO-1 → LUMO+1 | 9.68  |
|                 |                     | HOMO-2 → LUMO+4 | 5.48  |
| 259.45          | 0.0286              | HOMO-1 → LUMO+1 | 70.46 |
|                 |                     | HOMO-5 → LUMO   | 9.17  |
|                 |                     | HOMO-2 → LUMO+3 | 6.39  |
| 255.57          | 0.0368              | HOMO-2 → LUMO+3 | 36.79 |
|                 |                     | HOMO-2 → LUMO+2 | 26.06 |
|                 |                     | HOMO-1 → LUMO+3 | 13.81 |
| 254.92          | 0.0006              | HOMO-4 → LUMO   | 97.85 |
| 252,83          | 0.0603              | HOMO → LUMO+4   | 29.59 |
|                 |                     | HOMO-5 → LUMO   | 25.16 |
|                 |                     | HOMO-3 → LUMO+2 | 8.63  |
|                 |                     | HOMO-1 → LUMO+1 | 8.57  |
|                 |                     | HOMO → LUMO+1   | 6.15  |
|                 |                     | HOMO-3 → LUMO+1 | 6.59  |
| 251.66          | 0.0572              | HOMO → LUMO+4   | 25.24 |
|                 |                     | HOMO-3 → LUMO+2 | 20.90 |
|                 |                     | HOMO-5 → LUMO   | 17.42 |
|                 |                     | HOMO-3 → LUMO+1 | 9.68  |
|                 |                     | HOMO-1 → LUMO+1 | 5.52  |
|                 |                     | HOMO → LUMO+2   | 5.44  |
| 248.09          | 0.0121              | HOMO-3 → LUMO+2 | 39.84 |
|                 |                     | HOMO → LUMO+4   | 28.28 |

|        |        |                 |       |
|--------|--------|-----------------|-------|
|        |        | HOMO-6 → LUMO   | 15.46 |
| 246.70 | 0.0154 | HOMO-6 → LUMO   | 29.34 |
|        |        | HOMO-3 → LUMO+2 | 2.58  |
|        |        | HOMO-2 → LUMO+1 | 59.93 |
| 245.00 | 0.0602 | HOMO-6 → LUMO   | 38.05 |
|        |        | HOMO-2 → LUMO+1 | 26.76 |
|        |        | HOMO-3 → LUMO+1 | 12.73 |
|        |        | HOMO-3 → LUMO+2 | 6.19  |
| 237.46 | 0.0110 | HOMO → LUMO+5   | 28.45 |
|        |        | HOMO-3 → LUMO+3 | 23.89 |
|        |        | HOMO → LUMO+6   | 21.18 |
|        |        | HOMO-5 → LUMO+6 | 6.71  |
| 236.72 | 0.0196 | HOMO-1 → LUMO+4 | 49.78 |
|        |        | HOMO-3 → LUMO+3 | 19.92 |
|        |        | HOMO → LUMO+6   | 5.41  |
| 233.56 | 0.1755 | HOMO-3 → LUMO+1 | 39.85 |
|        |        | HOMO → LUMO+6   | 19.71 |
|        |        | HOMO-5 → LUMO   | 13.60 |
| 233.24 | 0.0719 | HOMO-3 → LUMO+3 | 17.45 |
|        |        | HOMO-2 → LUMO+4 | 16.88 |
|        |        | HOMO → LUMO+5   | 13.46 |
|        |        | HOMO-1 → LUMO+4 | 11.56 |
| 227.51 | 0.0465 | HOMO-2 → LUMO+4 | 22.46 |
|        |        | HOMO-7 → LUMO   | 16.52 |
|        |        | HOMO-2 → LUMO+5 | 11.85 |
|        |        | HOMO → LUMO+5   | 9.07  |
|        |        | HOMO-2 → LUMO+6 | 6.90  |
| 226.14 | 0.0939 | HOMO-7 → LUMO   | 65.59 |
|        |        | HOMO → LUMO+5   | 11.26 |
|        |        | HOMO → LUMO+6   | 6.13  |
| 225.44 | 0.1970 | HOMO → LUMO+6   | 19.62 |
|        |        | HOMO-2 → LUMO+4 | 15.99 |
|        |        | HOMO → LUMO+5   | 13.47 |
|        |        | HOMO-7 → LUMO   | 12.11 |
|        |        | HOMO-3 → LUMO+1 | 8.99  |
| 220.43 | 0.0366 | HOMO → LUMO+7   | 37.46 |
|        |        | HOMO → LUMO+9   | 16.95 |
|        |        | HOMO-3 → LUMO+7 | 5.59  |
|        |        | HOMO-3 → LUMO+9 | 5.15  |
| 218.42 | 0.0250 | HOMO → LUMO+7   | 17.77 |
|        |        | HOMO-1 → LUMO+6 | 10.91 |
|        |        | HOMO-1 → LUMO+5 | 8.70  |
|        |        | HOMO-2 → LUMO+5 | 8.54  |
|        |        | HOMO → LUMO+9   | 6.26  |
|        |        | HOMO-1 → LUMO+7 | 6.22  |
|        |        | HOMO-2 → LUMO+9 | 5.12  |

|        |        |                  |       |
|--------|--------|------------------|-------|
| 216.06 | 0.0304 | HOMO-2 → LUMO+5  | 28.46 |
|        |        | HOMO-2 → LUMO+10 | 11.15 |
|        |        | HOMO → LUMO+8    | 7.99  |
|        |        | HOMO-2 → LUMO+4  | 5.59  |
|        |        | HOMO → LUMO+5    | 5.09  |
| 214.69 | 0.0637 | HOMO-3 → LUMO+4  | 26.11 |
|        |        | HOMO-1 → LUMO+7  | 15.86 |
|        |        | HOMO → LUMO+8    | 8.72  |
|        |        | HOMO → LUMO+7    | 7,25  |
|        |        | HOMO-1 → LUMO+6  | 5.90  |
| 212.74 | 0.0374 | HOMO-1 → LUMO+5  | 37.08 |
|        |        | HOMO-3 → LUMO+4  | 14.92 |
|        |        | HOMO-1 → LUMO+7  | 13.58 |
|        |        | HOMO-1 → LUMO+10 | 6.48  |
|        |        | HOMO-1 → LUMO+6  | 5.64  |
| 211.84 | 0.0166 | HOMO-1 → LUMO+7  | 27.98 |
|        |        | HOMO-1 → LUMO+9  | 21.11 |
|        |        | HOMO-2 → LUMO+6  | 8.55  |
|        |        | HOMO-2 → LUMO+10 | 7.23  |
| 210.17 | 0.0011 | HOMO-9 → LUMO    | 91.82 |
| 210.08 | 0.0077 | HOMO-3 → LUMO+4  | 30.41 |
|        |        | HOMO → LUMO+5    | 10.37 |
|        |        | HOMO → LUMO+6    | 9.03  |
|        |        | HOMO → LUMO+8    | 6.00  |
|        |        | HOMO-8 → LUMO    | 5.58  |
| 209.20 | 0.0316 | HOMO-8 → LUMO    | 52.19 |
|        |        | HOMO-5 → LUMO+1  | 18.25 |
|        |        | HOMO-1 → LUMO+9  | 5.07  |
| 207.51 | 0.0164 | HOMO-1 → LUMO+9  | 20.99 |
|        |        | HOMO-2 → LUMO+7  | 13.74 |
|        |        | HOMO-2 → LUMO+6  | 8.45  |
|        |        | HOMO → LUMO+9    | 8.13  |
|        |        | HOMO-2 → LUMO+9  | 6.82  |
|        |        | HOMO-8 → LUMO    | 6.37  |
| 205.76 | 0.0041 | HOMO-4 → LUMO+1  | 38.04 |
|        |        | HOMO-4 → LUMO+2  | 35.00 |
|        |        | HOMO → LUMO+8    | 11.40 |
| 205.55 | 0.0029 | HOMO → LUMO+8    | 59.08 |
|        |        | HOMO-4 → LUMO+1  | 13.89 |
|        |        | HOMO-4 → LUMO+2  | 5.29  |
| 205.01 | 0.0037 | HOMO-4 → LUMO+2  | 46.86 |
|        |        | HOMO-4 → LUMO+1  | 46.22 |
| 203.66 | 0.0404 | HOMO-6 → LUMO+2  | 49.33 |
|        |        | HOMO-5 → LUMO+2  | 24.18 |
|        |        | HOMO-4 → LUMO+2  | 8.22  |
| 202.57 | 0.0074 | HOMO-3 → LUMO+6  | 18.38 |

|        |        |                 |       |
|--------|--------|-----------------|-------|
|        |        | HOMO-1 → LUMO+9 | 17.55 |
|        |        | HOMO-1 → LUMO+6 | 15.79 |
|        |        | HOMO-3 → LUMO+5 | 13.29 |
|        |        | HOMO → LUMO+6   | 5.81  |
| 201.56 | 0.0102 | HOMO-2 → LUMO+7 | 30.51 |
|        |        | HOMO-5 → LUMO+2 | 9.13  |
|        |        | HOMO-2 → LUMO+9 | 8.13  |
|        |        | HOMO-2 → LUMO+5 | 6.92  |
|        |        | HOMO-2 → LUMO+6 | 5.52  |
|        |        | HOMO-2 → LUMO+4 | 5.44  |
| 200.91 | 0.0114 | HOMO-6 → LUMO+1 | 49.88 |
|        |        | HOMO-5 → LUMO+2 | 24.42 |
|        |        | HOMO-5 → LUMO+1 | 7.38  |
| 200.57 | 0.0241 | HOMO-5 → LUMO+2 | 36.49 |
|        |        | HOMO-6 → LUMO+2 | 27.44 |
|        |        | HOMO-6 → LUMO+1 | 17.11 |
|        |        | HOMO-5 → LUMO+1 | 7.51  |

**Table S22.** Calculated transitions (with a contribution greater than 5%) for [Re(CO)<sub>3</sub>(Q)HPhpz] (**4**)

| Wavelength [nm] | Oscillator strength | Main components | %     |
|-----------------|---------------------|-----------------|-------|
| 402.89          | 0.0911              | HOMO → LUMO     | 96.64 |
| 344.74          | 0.0574              | HOMO-1 → LUMO   | 93.91 |
| 330.15          | 0.0011              | HOMO-2 → LUMO   | 97.08 |
| 319.23          | 0.0136              | HOMO → LUMO+1   | 91.70 |
| 310.94          | 0.0028              | HOMO-3 → LUMO   | 92.12 |
| 302.60          | 0.0009              | HOMO → LUMO+3   | 55.96 |
|                 |                     | HOMO → LUMO+2   | 15.15 |
|                 |                     | HOMO-1 → LUMO+3 | 7.79  |
| 299.70          | 0.0232              | HOMO → LUMO+2   | 63.00 |
|                 |                     | HOMO-5 → LUMO   | 15.65 |
|                 |                     | HOMO → LUMO+3   | 15.39 |
| 286.28          | 0.2524              | HOMO-1 → LUMO+1 | 65.22 |
|                 |                     | HOMO-1 → LUMO+3 | 8.12  |
|                 |                     | HOMO → LUMO+5   | 7.19  |
| 284.07          | 0.0214              | HOMO-1 → LUMO+3 | 54.39 |
|                 |                     | HOMO-1 → LUMO+1 | 11.42 |
|                 |                     | HOMO-2 → LUMO+3 | 7.42  |
|                 |                     | HOMO-1 → LUMO+5 | 5.48  |
| 274.80          | 0.1187              | HOMO-2 → LUMO+3 | 29.54 |
|                 |                     | HOMO-1 → LUMO+5 | 17.46 |
|                 |                     | HOMO-1 → LUMO+1 | 16.27 |
|                 |                     | HOMO → LUMO+5   | 14.82 |
|                 |                     | HOMO-3 → LUMO+5 | 5.90  |
| 270.75          | 0.0243              | HOMO-2 → LUMO+1 | 32.84 |
|                 |                     | HOMO → LUMO+5   | 29.02 |
|                 |                     | HOMO-1 → LUMO+3 | 8.36  |
|                 |                     | HOMO-2 → LUMO+3 | 5.96  |
|                 |                     | HOMO → LUMO+3   | 4.90  |
| 269.61          | 0.0080              | HOMO-2 → LUMO+1 | 46.02 |
|                 |                     | HOMO-4 → LUMO   | 14.43 |
|                 |                     | HOMO-2 → LUMO+5 | 13.48 |
|                 |                     | HOMO-2 → LUMO+3 | 8.46  |
|                 |                     | HOMO → LUMO+5   | 7.69  |
| 267.69          | 0.0250              | HOMO-4 → LUMO   | 72.06 |
|                 |                     | HOMO-2 → LUMO+3 | 6.84  |
| 261.22          | 0.0242              | HOMO-1 → LUMO+5 | 24.50 |
|                 |                     | HOMO-1 → LUMO+2 | 18.88 |
|                 |                     | HOMO-2 → LUMO+5 | 15.56 |
|                 |                     | HOMO → LUMO+5   | 9.68  |
|                 |                     | HOMO-2 → LUMO+3 | 6.20  |
| 259.26          | 0.0144              | HOMO-1 → LUMO+2 | 56.22 |
|                 |                     | HOMO-3 → LUMO+1 | 10.63 |
|                 |                     | HOMO-1 → LUMO+5 | 5.38  |

|        |        |                 |       |
|--------|--------|-----------------|-------|
| 257.80 | 0.0005 | HOMO → LUMO+4   | 82.38 |
|        |        | HOMO-1 → LUMO+2 | 5.08  |
| 256.91 | 0.0548 | HOMO-3 → LUMO+1 | 63.18 |
|        |        | HOMO-2 → LUMO+5 | 6.62  |
|        |        | HOMO → LUMO+4   | 6.54  |
| 250.86 | 0.1115 | HOMO-5 → LUMO   | 34.27 |
|        |        | HOMO-3 → LUMO+2 | 18.32 |
|        |        | HOMO → LUMO+2   | 9.36  |
|        |        | HOMO-1 → LUMO+2 | 7.46  |
|        |        | HOMO-2 → LUMO+5 | 6.26  |
| 249.56 | 0.0843 | HOMO-2 → LUMO+5 | 25.64 |
|        |        | HOMO-3 → LUMO+3 | 11.68 |
|        |        | HOMO-1 → LUMO+5 | 10.33 |
|        |        | HOMO-3 → LUMO+2 | 8.62  |
|        |        | HOMO-3 → LUMO+1 | 7.36  |
|        |        | HOMO-2 → LUMO+3 | 7.32  |
| 248.19 | 0.0045 | HOMO-1 → LUMO+4 | 43.45 |
|        |        | HOMO-6 → LUMO+1 | 28.54 |
|        |        | HOMO-4 → LUMO+4 | 10.33 |
| 247.39 | 0.0264 | HOMO-3 → LUMO+3 | 49.24 |
|        |        | HOMO-2 → LUMO+5 | 8.49  |
| 245.51 | 0.0086 | HOMO-2 → LUMO+2 | 85.22 |
| 238.89 | 0.0153 | HOMO-6 → LUMO   | 35.29 |
|        |        | HOMO → LUMO+6   | 22.18 |
|        |        | HOMO-4 → LUMO+1 | 8.88  |
|        |        | HOMO → LUMO+7   | 7.37  |
|        |        | HOMO → LUMO+8   | 5.95  |
| 238.76 | 0.0124 | HOMO-6 → LUMO   | 55.02 |
|        |        | HOMO → LUMO+6   | 15.27 |
|        |        | HOMO-4 → LUMO+1 | 5.76  |
|        |        | HOMO → LUMO+7   | 5.45  |
| 235.20 | 0.1166 | HOMO-4 → LUMO+1 | 67.52 |
|        |        | HOMO → LUMO+6   | 6.82  |
| 234.29 | 0.1614 | HOMO-3 → LUMO+2 | 28.29 |
|        |        | HOMO → LUMO+7   | 20.04 |
|        |        | HOMO-3 → LUMO+5 | 16.32 |
|        |        | HOMO-5 → LUMO   | 11.76 |
|        |        | HOMO → LUMO+6   | 5.75  |
| 232.21 | 0.1055 | HOMO-3 → LUMO+5 | 35.13 |
|        |        | HOMO → LUMO+8   | 14.97 |
|        |        | HOMO-3 → LUMO+2 | 14.69 |
|        |        | HOMO-4 → LUMO+1 | 8.26  |
| 230.84 | 0.0064 | HOMO → LUMO+6   | 27.70 |
|        |        | HOMO → LUMO+7   | 14.97 |
|        |        | HOMO-7 → LUMO   | 9.65  |
|        |        | HOMO-3 → LUMO+5 | 9.49  |

|        |        |                  |       |
|--------|--------|------------------|-------|
|        |        | HOMO → LUMO+8    | 7.54  |
| 230.70 | 0.0094 | HOMO-7 → LUMO    | 76.23 |
|        |        | HOMO-8 → LUMO    | 5.83  |
| 227.58 | 0.0361 | HOMO-1 → LUMO+4  | 35.19 |
|        |        | HOMO-6 → LUMO+1  | 19.53 |
|        |        | HOMO-1 → LUMO+6  | 8.28  |
|        |        | HOMO-4 → LUMO+4  | 5.64  |
|        |        | HOMO → LUMO+7    | 5.56  |
| 225.80 | 0.1771 | HOMO-8 → LUMO    | 25.57 |
|        |        | HOMO → LUMO+8    | 14.85 |
|        |        | HOMO → LUMO+7    | 9.17  |
|        |        | HOMO-3 → LUMO+2  | 7.11  |
|        |        | HOMO-1 → LUMO+4  | 6.94  |
| 225.25 | 0.1112 | HOMO-8 → LUMO    | 53.54 |
|        |        | HOMO → LUMO+7    | 8.04  |
|        |        | HOMO → LUMO+8    | 7.75  |
| 223.36 | 0.0134 | HOMO-1 → LUMO+6  | 25.58 |
|        |        | HOMO-1 → LUMO+9  | 18.61 |
|        |        | HOMO-1 → LUMO+8  | 8.56  |
|        |        | HOMO-2 → LUMO+7  | 6.06  |
|        |        | HOMO-2 → LUMO+6  | 5.83  |
| 220.53 | 0.0316 | HOMO-2 → LUMO+4  | 30.66 |
|        |        | HOMO → LUMO+9    | 18.99 |
|        |        | HOMO-2 → LUMO+7  | 8.22  |
|        |        | HOMO-2 → LUMO+8  | 6.05  |
| 220.05 | 0.0151 | HOMO-2 → LUMO+4  | 48.84 |
|        |        | HOMO → LUMO+9    | 16.01 |
|        |        | HOMO → LUMO+11   | 10.29 |
| 218.92 | 0.0343 | HOMO-1 → LUMO+7  | 16.42 |
|        |        | HOMO-2 → LUMO+4  | 12.84 |
|        |        | HOMO → LUMO+11   | 10.55 |
|        |        | HOMO-1 → LUMO+8  | 7.57  |
|        |        | HOMO-2 → LUMO+9  | 7.35  |
|        |        | HOMO → LUMO+8    | 5.95  |
| 217.41 | 0.0006 | HOMO-5 → LUMO+1  | 90.56 |
|        |        | HOMO-6 → LUMO+1  | 6.68  |
| 216.24 | 0.0100 | HOMO-4 → LUMO+3  | 27.71 |
|        |        | HOMO-4 → LUMO+2  | 17.92 |
|        |        | HOMO-2 → LUMO+7  | 14.92 |
|        |        | HOMO-2 → LUMO+12 | 6.87  |
| 215.12 | 0.0280 | HOMO-4 → LUMO+2  | 26.00 |
|        |        | HOMO-2 → LUMO+7  | 14.46 |
|        |        | HOMO-4 → LUMO+3  | 10.45 |
|        |        | HOMO-2 → LUMO+12 | 7.22  |
|        |        | HOMO → LUMO+9    | 5.92  |
| 214.32 | 0.0072 | HOMO-4 → LUMO+2  | 11.00 |

|        |        |                  |       |
|--------|--------|------------------|-------|
|        |        | HOMO-2 → LUMO+6  | 10.12 |
|        |        | HOMO-1 → LUMO+9  | 8.82  |
|        |        | HOMO-1 → LUMO+7  | 8.79  |
|        |        | HOMO-1 → LUMO+8  | 8.09  |
|        |        | HOMO-7 → LUMO+1  | 6.52  |
|        |        | HOMO-1 → LUMO+11 | 6.16  |
| 213.51 | 0.0047 | HOMO-4 → LUMO+3  | 38.47 |
|        |        | HOMO-4 → LUMO+2  | 32.47 |
| 212.86 | 0.0199 | HOMO-3 → LUMO+4  | 77.02 |
|        |        | HOMO-6 → LUMO+1  | 6.80  |
| 212.52 | 0.0045 | HOMO-7 → LUMO+1  | 17.51 |
|        |        | HOMO-11 → LUMO   | 13.84 |
|        |        | HOMO-9 → LUMO    | 12.24 |
|        |        | HOMO-1 → LUMO+9  | 7.90  |
|        |        | HOMO-1 → LUMO+11 | 7.85  |
|        |        | HOMO-2 → LUMO+6  | 5.77  |
| 212.01 | 0.0025 | HOMO-11 → LUMO   | 40.53 |
|        |        | HOMO-9 → LUMO    | 13.72 |
|        |        | HOMO-7 → LUMO+1  | 12.29 |
|        |        | HOMO-1 → LUMO+9  | 6.85  |
| 210.81 | 0.0153 | HOMO → LUMO+9    | 12.34 |
|        |        | HOMO-2 → LUMO+8  | 11.10 |
|        |        | HOMO-1 → LUMO+11 | 9.88  |
|        |        | HOMO-2 → LUMO+9  | 8.98  |
|        |        | HOMO → LUMO+12   | 7.27  |
|        |        | HOMO-2 → LUMO+6  | 6.81  |
|        |        | HOMO-2 → LUMO+11 | 6.74  |
| 210.44 | 0.0315 | HOMO-1 → LUMO+7  | 28.60 |
|        |        | HOMO-2 → LUMO+6  | 8.48  |
|        |        | HOMO → LUMO+11   | 8.00  |
|        |        | HOMO-2 → LUMO+11 | 7.64  |
|        |        | HOMO → LUMO+12   | 6.58  |
|        |        | HOMO-3 → LUMO+6  | 5.68  |
| 209.33 | 0.0188 | HOMO-9 → LUMO    | 25.13 |
|        |        | HOMO-10 → LUMO   | 22.02 |
|        |        | HOMO-5 → LUMO+2  | 17.70 |
|        |        | HOMO-11 → LUMO   | 10.85 |
|        |        | HOMO-1 → LUMO+11 | 5.43  |
| 207.12 | 0.0094 | HOMO-7 → LUMO+1  | 15.94 |
|        |        | HOMO-1 → LUMO+11 | 13.47 |
|        |        | HOMO-1 → LUMO+9  | 10.60 |
|        |        | HOMO-1 → LUMO+6  | 6.82  |
|        |        | HOMO → LUMO+12   | 6.62  |
|        |        | HOMO-2 → LUMO+6  | 5.03  |
| 206.46 | 0.0798 | HOMO-7 → LUMO+1  | 18.78 |
|        |        | HOMO → LUMO+11   | 10.15 |



|        |        |                  |       |
|--------|--------|------------------|-------|
|        |        | HOMO-1 → LUMO+6  | 9.52  |
|        |        | HOMO-3 → LUMO+7  | 7.75  |
|        |        | HOMO-2 → LUMO+6  | 6.59  |
|        |        | HOMO-4 → LUMO+5  | 5.20  |
| 204.55 | 0.0066 | HOMO → LUMO+10   | 76.59 |
| 204.23 | 0.0031 | HOMO-4 → LUMO+5  | 48.43 |
|        |        | HOMO-3 → LUMO+6  | 8.89  |
|        |        | HOMO-3 → LUMO+7  | 5.34  |
|        |        | HOMO-3 → LUMO+8  | 5.07  |
| 201.61 | 0.0110 | HOMO-1 → LUMO+8  | 23.12 |
|        |        | HOMO-1 → LUMO+11 | 20.89 |
|        |        | HOMO-3 → LUMO+7  | 8.13  |
|        |        | HOMO-4 → LUMO+5  | 6.38  |
|        |        | HOMO-3 → LUMO+8  | 5.90  |
|        |        | HOMO-1 → LUMO+9  | 5.75  |
| 200.98 | 0.0071 | HOMO-5 → LUMO+3  | 81.08 |
|        |        | HOMO-5 → LUMO+2  | 5.27  |
| 200.56 | 0.1215 | HOMO-4 → LUMO+4  | 58.66 |
|        |        | HOMO-6 → LUMO+1  | 15.38 |
|        |        | HOMO-3 → LUMO+6  | 5.14  |

**Table S23.** Calculated transitions (with a contribution greater than 5%) for [Re(CO)<sub>3</sub>(MeQ)Him] (**5**)

| Wavelength [nm] | Oscillator strength | Main components | %     |
|-----------------|---------------------|-----------------|-------|
| 425.06          | 0.0730              | HOMO → LUMO     | 98.25 |
| 333.24          | 0.0384              | HOMO-1 → LUMO   | 82.39 |
|                 |                     | HOMO-2 → LUMO   | 13.83 |
| 326.96          | 0.0278              | HOMO-2 → LUMO   | 82.51 |
|                 |                     | HOMO-1 → LUMO   | 13.02 |
| 307.93          | 0.0226              | HOMO → LUMO+1   | 73.63 |
|                 |                     | HOMO-4 → LUMO   | 13.81 |
|                 |                     | HOMO → LUMO+2   | 8.19  |
| 307.50          | 0.0026              | HOMO → LUMO+2   | 77.67 |
|                 |                     | HOMO → LUMO+1   | 6.71  |
|                 |                     | HOMO-3 → LUMO+2 | 6.37  |
| 306.34          | 0.0119              | HOMO-3 → LUMO   | 92.31 |
| 289.64          | 0.0064              | HOMO → LUMO+3   | 72.73 |
|                 |                     | HOMO-1 → LUMO+2 | 9.99  |
| 273.60          | 0.0109              | HOMO-1 → LUMO+2 | 60.72 |
|                 |                     | HOMO-1 → LUMO+3 | 12.43 |
|                 |                     | HOMO-2 → LUMO+2 | 10.11 |
| 268.14          | 0.0143              | HOMO-2 → LUMO+2 | 32.54 |
|                 |                     | HOMO-1 → LUMO+3 | 21.25 |
|                 |                     | HOMO-1 → LUMO+2 | 14.45 |
|                 |                     | HOMO → LUMO+3   | 10.10 |
| 262.72          | 0.1000              | HOMO-4 → LUMO   | 34.11 |
|                 |                     | HOMO-1 → LUMO+1 | 17.53 |
|                 |                     | HOMO-2 → LUMO+3 | 13.49 |
|                 |                     | HOMO → LUMO+1   | 7.35  |
|                 |                     | HOMO → LUMO+4   | 7.01  |
|                 |                     | HOMO-2 → LUMO+2 | 5.90  |
| 261.31          | 0.0699              | HOMO-2 → LUMO+3 | 27.09 |
|                 |                     | HOMO-1 → LUMO+3 | 19.03 |
|                 |                     | HOMO-4 → LUMO   | 18.27 |
|                 |                     | HOMO-2 → LUMO+1 | 15.47 |
| 258.80          | 0.0055              | HOMO-5 → LUMO   | 98.16 |
| 255.67          | 0.0372              | HOMO → LUMO+4   | 77.44 |
|                 |                     | HOMO-1 → LUMO+1 | 6.09  |
| 251.56          | 0.0590              | HOMO-2 → LUMO+3 | 30.80 |
|                 |                     | HOMO-2 → LUMO+2 | 28.53 |
|                 |                     | HOMO-1 → LUMO+3 | 10.81 |
|                 |                     | HOMO-1 → LUMO+5 | 8.05  |
| 246.40          | 0.0019              | HOMO-3 → LUMO+2 | 63.20 |
|                 |                     | HOMO → LUMO+5   | 11.42 |
|                 |                     | HOMO → LUMO+2   | 6.03  |
| 245.84          | 0.0499              | HOMO-1 → LUMO+1 | 59.44 |
|                 |                     | HOMO-1 → LUMO+3 | 13.27 |

|        |        |                 |       |
|--------|--------|-----------------|-------|
|        |        | HOMO-2 → LUMO+1 | 7.52  |
|        |        | HOMO-4 → LUMO   | 6.99  |
| 242.27 | 0.0066 | HOMO → LUMO+5   | 39.05 |
|        |        | HOMO-2 → LUMO+1 | 17.20 |
|        |        | HOMO-3 → LUMO+3 | 11.68 |
|        |        | HOMO-3 → LUMO+2 | 9.79  |
| 240.62 | 0.0525 | HOMO-2 → LUMO+1 | 48.32 |
|        |        | HOMO-2 → LUMO+3 | 10.77 |
|        |        | HOMO-3 → LUMO+1 | 9.13  |
|        |        | HOMO-3 → LUMO+3 | 7.21  |
| 235.50 | 0.0239 | HOMO → LUMO+6   | 25.15 |
|        |        | HOMO → LUMO+7   | 23.02 |
|        |        | HOMO-3 → LUMO+1 | 15.16 |
|        |        | HOMO → LUMO+8   | 6.49  |
| 233.78 | 0.1090 | HOMO → LUMO+7   | 30.34 |
|        |        | HOMO-3 → LUMO+1 | 22.32 |
|        |        | HOMO-3 → LUMO+3 | 9.33  |
| 232.68 | 0.0168 | HOMO-6 → LUMO   | 21.65 |
|        |        | HOMO-3 → LUMO+3 | 18.80 |
|        |        | HOMO → LUMO+5   | 12.08 |
|        |        | HOMO → LUMO+6   | 11.35 |
|        |        | HOMO-3 → LUMO+1 | 8.72  |
| 232.36 | 0.0038 | HOMO-6 → LUMO   | 70.85 |
|        |        | HOMO-3 → LUMO+3 | 5.85  |
| 229.79 | 0.1194 | HOMO-1 → LUMO+4 | 33.83 |
|        |        | HOMO-3 → LUMO+1 | 11.12 |
|        |        | HOMO → LUMO+6   | 9.89  |
|        |        | HOMO → LUMO+7   | 7.04  |
|        |        | HOMO-1 → LUMO+7 | 6.42  |
|        |        | HOMO-2 → LUMO+4 | 5.63  |
| 227.23 | 0.1140 | HOMO-3 → LUMO+1 | 16.43 |
|        |        | HOMO → LUMO+6   | 11.44 |
|        |        | HOMO-2 → LUMO+4 | 10.19 |
|        |        | HOMO-1 → LUMO+4 | 9.55  |
|        |        | HOMO → LUMO+7   | 7.79  |
|        |        | HOMO-3 → LUMO+3 | 7.19  |
|        |        | HOMO-1 → LUMO+5 | 5.45  |
| 224.25 | 0.0177 | HOMO → LUMO+8   | 37.97 |
|        |        | HOMO-2 → LUMO+4 | 14.23 |
|        |        | HOMO → LUMO+10  | 11.73 |
| 222.77 | 0.0641 | HOMO-2 → LUMO+5 | 29.72 |
|        |        | HOMO-2 → LUMO+4 | 14.61 |
|        |        | HOMO-2 → LUMO+7 | 8.16  |
|        |        | HOMO-2 → LUMO+6 | 5.01  |
| 218.64 | 0.0281 | HOMO-2 → LUMO+5 | 14.83 |
|        |        | HOMO-1 → LUMO+7 | 10.61 |

|        |        |                  |       |
|--------|--------|------------------|-------|
|        |        | HOMO → LUMO+10   | 10.14 |
|        |        | HOMO-3 → LUMO+3  | 8.18  |
|        |        | HOMO-1 → LUMO+4  | 8.02  |
|        |        | HOMO-2 → LUMO+8  | 7.92  |
|        |        | HOMO-1 → LUMO+8  | 5.56  |
|        |        | HOMO-1 → LUMO+5  | 5.41  |
| 216.14 | 0.0314 | HOMO-2 → LUMO+4  | 23.03 |
|        |        | HOMO → LUMO+10   | 17.15 |
|        |        | HOMO-1 → LUMO+4  | 17.09 |
|        |        | HOMO-1 → LUMO+5  | 9.16  |
| 214.85 | 0.0125 | HOMO-1 → LUMO+7  | 16.82 |
|        |        | HOMO-8 → LUMO    | 14.73 |
|        |        | HOMO-1 → LUMO+8  | 13.85 |
|        |        | HOMO-2 → LUMO+4  | 5.77  |
| 213.85 | 0.0018 | HOMO-8 → LUMO    | 43.72 |
|        |        | HOMO-9 → LUMO    | 11.78 |
|        |        | HOMO → LUMO+9    | 10.42 |
|        |        | HOMO-7 → LUMO    | 8.11  |
| 212.74 | 0.0224 | HOMO → LUMO+9    | 38.82 |
|        |        | HOMO-8 → LUMO    | 12.70 |
| 211.54 | 0.0234 | HOMO-7 → LUMO    | 47.13 |
|        |        | HOMO-4 → LUMO+1  | 23.10 |
|        |        | HOMO → LUMO+9    | 5.49  |
| 211.04 | 0.0170 | HOMO-3 → LUMO+4  | 34.12 |
|        |        | HOMO → LUMO+9    | 18.70 |
|        |        | HOMO → LUMO+8    | 13.91 |
|        |        | HOMO → LUMO+11   | 6.64  |
| 209.33 | 0.0231 | HOMO → LUMO+11   | 19.05 |
|        |        | HOMO-1 → LUMO+10 | 13.18 |
|        |        | HOMO-2 → LUMO+6  | 9.61  |
|        |        | HOMO-1 → LUMO+6  | 8.70  |
|        |        | HOMO-1 → LUMO+5  | 6.92  |
|        |        | HOMO-3 → LUMO+4  | 6.13  |
|        |        | HOMO-2 → LUMO+11 | 5.09  |
| 208.31 | 0.0219 | HOMO-3 → LUMO+4  | 27.40 |
|        |        | HOMO → LUMO+10   | 14.34 |
|        |        | HOMO → LUMO+11   | 11.05 |
|        |        | HOMO-1 → LUMO+5  | 8.42  |
|        |        | HOMO → LUMO+8    | 6.49  |
|        |        | HOMO-2 → LUMO+10 | 6.47  |
|        |        | HOMO-1 → LUMO+6  | 5.12  |
| 208.08 | 0.0186 | HOMO-1 → LUMO+10 | 12.47 |
|        |        | HOMO-2 → LUMO+7  | 10.51 |
|        |        | HOMO-1 → LUMO+6  | 10.27 |
|        |        | HOMO-2 → LUMO+10 | 10.27 |
|        |        | HOMO-5 → LUMO+1  | 6.43  |

|        |        |                  |       |
|--------|--------|------------------|-------|
|        |        | HOMO-3 → LUMO+4  | 5.58  |
|        |        | HOMO-2 → LUMO+6  | 5.24  |
| 206.99 | 0.0084 | HOMO-5 → LUMO+1  | 83.30 |
| 204.98 | 0.0052 | HOMO-5 → LUMO+2  | 88.85 |
|        |        | HOMO-5 → LUMO+1  | 3.97  |
| 204.47 | 0.0040 | HOMO-2 → LUMO+7  | 25.66 |
|        |        | HOMO-1 → LUMO+10 | 24.09 |
|        |        | HOMO → LUMO+11   | 9.24  |
|        |        | HOMO-2 → LUMO+4  | 6.43  |
| 203.25 | 0.0018 | HOMO-4 → LUMO+2  | 95.90 |
| 202.48 | 0.0165 | HOMO-3 → LUMO+5  | 36.65 |
|        |        | HOMO-3 → LUMO+6  | 10.98 |
|        |        | HOMO-2 → LUMO+7  | 6.10  |
|        |        | HOMO-1 → LUMO+10 | 5.01  |
| 200.44 | 0.0216 | HOMO-5 → LUMO+3  | 21.12 |
|        |        | HOMO → LUMO+10   | 11.37 |
|        |        | HOMO-1 → LUMO+8  | 8.85  |
|        |        | HOMO-1 → LUMO+7  | 7.15  |
|        |        | HOMO-1 → LUMO+5  | 5.68  |

**Table S24.** Calculated transitions (with a contribution greater than 5%) for [Re(CO)<sub>3</sub>(MeQ)MeHim] (**6**)

| Wavelength [nm] | Oscillator strength | Main components | %     |
|-----------------|---------------------|-----------------|-------|
| 426.92          | 0.0677              | HOMO → LUMO     | 98.32 |
| 335.66          | 0.0567              | HOMO-1 → LUMO   | 95.32 |
| 330.72          | 0.0006              | HOMO-2 → LUMO   | 97.43 |
| 310.76          | 0.0062              | HOMO → LUMO+2   | 66.69 |
|                 |                     | HOMO → LUMO+1   | 21.15 |
| 309.66          | 0.0222              | HOMO → LUMO+1   | 63.00 |
|                 |                     | HOMO → LUMO+2   | 20.85 |
|                 |                     | HOMO-5 → LUMO   | 10.76 |
| 301.38          | 0.0280              | HOMO-3 → LUMO   | 95.71 |
| 288.67          | 0.0032              | HOMO → LUMO+3   | 62.04 |
|                 |                     | HOMO-1 → LUMO+2 | 9.62  |
|                 |                     | HOMO-1 → LUMO+3 | 9.09  |
|                 |                     | HOMO-2 → LUMO+2 | 5.69  |
| 275.64          | 0.0177              | HOMO-1 → LUMO+2 | 49.97 |
|                 |                     | HOMO-1 → LUMO+3 | 11.38 |
|                 |                     | HOMO-1 → LUMO+1 | 11.23 |
|                 |                     | HOMO-4 → LUMO   | 9.68  |
| 274.97          | 0.0046              | HOMO-4 → LUMO   | 83.05 |
|                 |                     | HOMO-1 → LUMO+2 | 8.06  |
| 270.17          | 0.0131              | HOMO-2 → LUMO+2 | 47.47 |
|                 |                     | HOMO → LUMO+3   | 12.94 |
|                 |                     | HOMO-1 → LUMO+3 | 9.71  |
|                 |                     | HOMO-4 → LUMO   | 5.84  |
| 262.68          | 0.1400              | HOMO-5 → LUMO   | 42.61 |
|                 |                     | HOMO-1 → LUMO+1 | 28.59 |
|                 |                     | HOMO → LUMO+3   | 8.62  |
|                 |                     | HOMO → LUMO+1   | 7.68  |
| 260.54          | 0.0066              | HOMO-2 → LUMO+3 | 57.37 |
|                 |                     | HOMO-2 → LUMO+1 | 31.08 |
| 255.76          | 0.0751              | HOMO-1 → LUMO+3 | 32.08 |
|                 |                     | HOMO-2 → LUMO+2 | 19.40 |
|                 |                     | HOMO-5 → LUMO   | 5.84  |
|                 |                     | HOMO-1 → LUMO+2 | 5.69  |
| 247.85          | 0.0270              | HOMO-3 → LUMO+2 | 42.90 |
|                 |                     | HOMO → LUMO+5   | 24.55 |
|                 |                     | HOMO → LUMO+4   | 7.32  |
| 246.41          | 0.0246              | HOMO → LUMO+4   | 67.87 |
|                 |                     | HOMO-3 → LUMO+2 | 9.48  |
|                 |                     | HOMO-1 → LUMO+1 | 5.80  |
| 244.06          | 0.0478              | HOMO → LUMO+5   | 27.23 |
|                 |                     | HOMO-3 → LUMO+2 | 20.11 |
|                 |                     | HOMO-1 → LUMO+1 | 18.06 |
|                 |                     | HOMO-5 → LUMO   | 7.45  |

|        |        |                 |       |
|--------|--------|-----------------|-------|
| 242.23 | 0.0708 | HOMO-1 → LUMO+3 | 5.95  |
|        |        | HOMO-2 → LUMO+1 | 21.95 |
|        |        | HOMO-1 → LUMO+1 | 14.37 |
|        |        | HOMO-2 → LUMO+3 | 13.05 |
|        |        | HOMO → LUMO+5   | 12.08 |
|        |        | HOMO-1 → LUMO+3 | 9.27  |
| 241.48 | 0.0787 | HOMO-5 → LUMO   | 5.47  |
|        |        | HOMO-2 → LUMO+1 | 37.70 |
|        |        | HOMO-2 → LUMO+3 | 20.54 |
|        |        | HOMO-1 → LUMO+1 | 8.66  |
|        |        | HOMO → LUMO+4   | 7.98  |
| 235.06 | 0.0202 | HOMO-5 → LUMO   | 5.35  |
|        |        | HOMO-3 → LUMO+1 | 38.19 |
|        |        | HOMO → LUMO+7   | 10.67 |
|        |        | HOMO-3 → LUMO+3 | 8.10  |
|        |        | HOMO-6 → LUMO   | 7.18  |
|        |        | HOMO-1 → LUMO+5 | 7.73  |
| 233.63 | 0.1290 | HOMO → LUMO+6   | 7.13  |
|        |        | HOMO → LUMO+7   | 40.50 |
|        |        | HOMO-3 → LUMO+3 | 7.96  |
|        |        | HOMO-3 → LUMO+1 | 7.72  |
|        |        | HOMO-2 → LUMO+5 | 6.62  |
| 232.98 | 0.0108 | HOMO-1 → LUMO+7 | 6.48  |
|        |        | HOMO-6 → LUMO   | 82.78 |
|        |        | HOMO-3 → LUMO+3 | 24.21 |
|        |        | HOMO-3 → LUMO+1 | 20.12 |
| 228.43 | 0.0217 | HOMO → LUMO+6   | 18.60 |
|        |        | HOMO-1 → LUMO+5 | 15.92 |
|        |        | HOMO → LUMO+6   | 45.43 |
|        |        | HOMO-3 → LUMO+1 | 13.74 |
| 225.08 | 0.1752 | HOMO-3 → LUMO+3 | 6.30  |
|        |        | HOMO → LUMO+7   | 6.14  |
|        |        | HOMO → LUMO+10  | 27.70 |
|        |        | HOMO-2 → LUMO+4 | 24.06 |
| 224.20 | 0.0103 | HOMO-2 → LUMO+5 | 5.91  |
|        |        | HOMO → LUMO+6   | 5.69  |
|        |        | HOMO-1 → LUMO+5 | 5.09  |
|        |        | HOMO-2 → LUMO+4 | 21.76 |
| 223.75 | 0.0121 | HOMO → LUMO+10  | 18.54 |
|        |        | HOMO-2 → LUMO+7 | 17.66 |
|        |        | HOMO-1 → LUMO+4 | 13.14 |
|        |        | HOMO-1 → LUMO+7 | 7.33  |
|        |        | HOMO-2 → LUMO+5 | 28.04 |
| 221.77 | 0.0106 | HOMO → LUMO+10  | 12.46 |
|        |        | HOMO-1 → LUMO+7 | 10.19 |
|        |        | HOMO-1 → LUMO+4 | 8.75  |
|        |        | HOMO-1 → LUMO+4 | 8.75  |

|        |        |                  |       |
|--------|--------|------------------|-------|
|        |        | HOMO → LUMO+7    | 5.52  |
| 218.94 | 0.0042 | HOMO → LUMO+8    | 41.39 |
|        |        | HOMO-2 → LUMO+4  | 13.24 |
|        |        | HOMO-4 → LUMO+1  | 5.87  |
|        |        | HOMO-2 → LUMO+7  | 5.28  |
| 218.05 | 0.0094 | HOMO-4 → LUMO+1  | 71.10 |
|        |        | HOMO-4 → LUMO+2  | 13.99 |
| 217.24 | 0.0116 | HOMO-7 → LUMO    | 33.08 |
|        |        | HOMO-8 → LUMO    | 18.53 |
|        |        | HOMO-4 → LUMO+2  | 15.48 |
|        |        | HOMO-9 → LUMO    | 8.67  |
|        |        | HOMO → LUMO+8    | 5.47  |
| 216.65 | 0.0393 | HOMO-1 → LUMO+4  | 36.94 |
|        |        | HOMO-1 → LUMO+7  | 12.20 |
|        |        | HOMO-2 → LUMO+7  | 7.97  |
|        |        | HOMO-3 → LUMO+3  | 7.31  |
|        |        | HOMO-4 → LUMO+2  | 7.30  |
|        |        | HOMO-1 → LUMO+8  | 5.26  |
| 216.58 | 0.0110 | HOMO-4 → LUMO+2  | 49.21 |
|        |        | HOMO-4 → LUMO+1  | 15.41 |
|        |        | HOMO-7 → LUMO    | 9.18  |
|        |        | HOMO-8 → LUMO    | 7.18  |
| 213.55 | 0.0307 | HOMO → LUMO+9    | 36.80 |
|        |        | HOMO-1 → LUMO+7  | 10.25 |
|        |        | HOMO → LUMO+8    | 10.13 |
|        |        | HOMO-2 → LUMO+7  | 7.50  |
|        |        | HOMO-4 → LUMO+2  | 5.75  |
| 212.54 | 0.0220 | HOMO → LUMO+9    | 29.65 |
|        |        | HOMO-2 → LUMO+7  | 26.09 |
|        |        | HOMO-1 → LUMO+7  | 6.17  |
| 212.07 | 0.0321 | HOMO → LUMO+9    | 15.59 |
|        |        | HOMO-1 → LUMO+10 | 14.38 |
|        |        | HOMO-3 → LUMO+5  | 8.88  |
|        |        | HOMO-1 → LUMO+5  | 6.85  |
| 211.42 | 0.0161 | HOMO-8 → LUMO    | 28.38 |
|        |        | HOMO-5 → LUMO+1  | 17.03 |
|        |        | HOMO-7 → LUMO    | 13.48 |
|        |        | HOMO-9 → LUMO    | 7.94  |
|        |        | HOMO → LUMO+8    | 7.87  |
| 210.00 | 0.0194 | HOMO → LUMO+11   | 11.23 |
|        |        | HOMO-8 → LUMO    | 9.41  |
|        |        | HOMO-2 → LUMO+5  | 8.85  |
|        |        | HOMO → LUMO+8    | 8.38  |
|        |        | HOMO-2 → LUMO+4  | 7.99  |
|        |        | HOMO-7 → LUMO    | 6.80  |
|        |        | HOMO-3 → LUMO+4  | 5.81  |



|        |        |                  |       |
|--------|--------|------------------|-------|
|        |        | HOMO-1 → LUMO+7  | 5.47  |
| 205.60 | 0.0013 | HOMO-4 → LUMO+3  | 83.45 |
| 204.98 | 0.0042 | HOMO-5 → LUMO+2  | 95.36 |
| 204.01 | 0.0105 | HOMO-3 → LUMO+5  | 38.92 |
|        |        | HOMO-1 → LUMO+5  | 11.46 |
|        |        | HOMO-3 → LUMO+4  | 8.51  |
|        |        | HOMO-2 → LUMO+10 | 8.46  |
|        |        | HOMO-1 → LUMO+6  | 6.53  |
| 203.30 | 0.0028 | HOMO-1 → LUMO+10 | 36.75 |
|        |        | HOMO-3 → LUMO+5  | 17.41 |
| 200.95 | 0.0347 | HOMO → LUMO+11   | 34.10 |
|        |        | HOMO-3 → LUMO+4  | 22.00 |
|        |        | HOMO-1 → LUMO+6  | 8.17  |
|        |        | HOMO-1 → LUMO+5  | 5.22  |

**Table S25.** Calculated transitions (with a contribution greater than 5%) for [Re(CO)<sub>3</sub>(MeQ)Hdmpz] (7)

| Wavelength [nm] | Oscillator strength | Main components | %     |
|-----------------|---------------------|-----------------|-------|
| 405.64          | 0.0772              | HOMO → LUMO     | 97.64 |
| 339.30          | 0.0609              | HOMO-1 → LUMO   | 95.39 |
| 325.27          | 0.0029              | HOMO-2 → LUMO   | 96.04 |
| 306.67          | 0.0010              | HOMO-3 → LUMO   | 91.51 |
| 302.42          | 0.0045              | HOMO → LUMO+1   | 41.51 |
|                 |                     | HOMO → LUMO+2   | 36.61 |
|                 |                     | HOMO-4 → LUMO   | 6.53  |
| 299.91          | 0.0102              | HOMO → LUMO+2   | 45.24 |
|                 |                     | HOMO → LUMO+1   | 32.64 |
|                 |                     | HOMO-4 → LUMO   | 14.30 |
| 286.17          | 0.0010              | HOMO → LUMO+3   | 51.83 |
|                 |                     | HOMO-1 → LUMO+2 | 32.48 |
| 278.22          | 0.0077              | HOMO-1 → LUMO+3 | 37.13 |
|                 |                     | HOMO-1 → LUMO+2 | 22.84 |
|                 |                     | HOMO-1 → LUMO+1 | 12.11 |
|                 |                     | HOMO → LUMO+3   | 11.10 |
|                 |                     | HOMO-2 → LUMO+2 | 6.94  |
| 270.07          | 0.0276              | HOMO-2 → LUMO+2 | 27.76 |
|                 |                     | HOMO → LUMO+3   | 21.82 |
|                 |                     | HOMO-1 → LUMO+2 | 18.30 |
|                 |                     | HOMO-1 → LUMO+3 | 7.52  |
|                 |                     | HOMO-1 → LUMO+4 | 5.01  |
| 261.88          | 0.0647              | HOMO-2 → LUMO+3 | 20.04 |
|                 |                     | HOMO-4 → LUMO   | 18.52 |
|                 |                     | HOMO-1 → LUMO+1 | 16.25 |
|                 |                     | HOMO-2 → LUMO+1 | 5.57  |
|                 |                     | HOMO-2 → LUMO+2 | 5.02  |
| 256.56          | 0.1192              | HOMO-4 → LUMO   | 26.88 |
|                 |                     | HOMO-2 → LUMO+3 | 24.32 |
|                 |                     | HOMO-2 → LUMO+1 | 11.40 |
|                 |                     | HOMO-1 → LUMO+3 | 10.39 |
|                 |                     | HOMO → LUMO+1   | 8.51  |
| 253.97          | 0.0762              | HOMO-2 → LUMO+2 | 36.11 |
|                 |                     | HOMO-2 → LUMO+3 | 20.81 |
|                 |                     | HOMO-1 → LUMO+3 | 13.67 |
| 253.01          | 0.0070              | HOMO → LUMO+4   | 47.92 |
|                 |                     | HOMO-1 → LUMO+1 | 32.08 |
| 252.26          | 0.0045              | HOMO-5 → LUMO   | 86.70 |
|                 |                     | HOMO → LUMO+4   | 5.14  |
| 249.50          | 0.0852              | HOMO-1 → LUMO+1 | 28.96 |
|                 |                     | HOMO → LUMO+4   | 16.04 |
|                 |                     | HOMO-4 → LUMO   | 11.61 |
|                 |                     | HOMO-3 → LUMO+2 | 9.20  |

|        |        |                 |       |
|--------|--------|-----------------|-------|
|        |        | HOMO-1 → LUMO+3 | 8.38  |
|        |        | HOMO-3 → LUMO+1 | 6.72  |
|        |        | HOMO-5 → LUMO   | 5.56  |
| 245.73 | 0.0207 | HOMO-3 → LUMO+2 | 50.31 |
|        |        | HOMO-6 → LUMO   | 16.49 |
|        |        | HOMO → LUMO+4   | 11.06 |
| 243.65 | 0.0445 | HOMO-6 → LUMO   | 72.76 |
|        |        | HOMO-3 → LUMO+2 | 9.39  |
|        |        | HOMO → LUMO+4   | 5.45  |
| 240.39 | 0.0201 | HOMO-4 → LUMO+1 | 68.19 |
|        |        | HOMO-2 → LUMO+3 | 17.55 |
| 238.20 | 0.0095 | HOMO-3 → LUMO+3 | 27.94 |
|        |        | HOMO → LUMO+5   | 24.05 |
|        |        | HOMO → LUMO+6   | 16.22 |
|        |        | HOMO-3 → LUMO+1 | 8.41  |
| 235.64 | 0.0256 | HOMO-1 → LUMO+4 | 52.02 |
|        |        | HOMO-3 → LUMO+3 | 11.28 |
|        |        | HOMO → LUMO+6   | 6.87  |
|        |        | HOMO-1 → LUMO+7 | 6.81  |
| 232.96 | 0.1081 | HOMO-3 → LUMO+1 | 37.03 |
|        |        | HOMO → LUMO+6   | 18.95 |
|        |        | HOMO-1 → LUMO+4 | 8.55  |
| 230.92 | 0.0664 | HOMO → LUMO+5   | 28.10 |
|        |        | HOMO-3 → LUMO+3 | 19.26 |
|        |        | HOMO-3 → LUMO+1 | 11.51 |
|        |        | HOMO-2 → LUMO+4 | 7.38  |
|        |        | HOMO → LUMO+6   | 5.25  |
| 227.73 | 0.0990 | HOMO-2 → LUMO+4 | 22.24 |
|        |        | HOMO → LUMO+5   | 12.79 |
|        |        | HOMO → LUMO+7   | 10.60 |
|        |        | HOMO-3 → LUMO+1 | 8.32  |
|        |        | HOMO-2 → LUMO+7 | 7.52  |
|        |        | HOMO → LUMO+6   | 7.43  |
| 225.97 | 0.0275 | HOMO-7 → LUMO   | 87.73 |
| 224.16 | 0.1961 | HOMO-2 → LUMO+4 | 19.06 |
|        |        | HOMO → LUMO+6   | 16.80 |
|        |        | HOMO-3 → LUMO+1 | 9.94  |
|        |        | HOMO-3 → LUMO+3 | 9.14  |
|        |        | HOMO → LUMO+5   | 7.99  |
| 222.90 | 0.0266 | HOMO → LUMO+7   | 43.56 |
|        |        | HOMO → LUMO+9   | 13.84 |
|        |        | HOMO-2 → LUMO+4 | 7.46  |
|        |        | HOMO-3 → LUMO+7 | 5.38  |
| 218.34 | 0.0253 | HOMO-2 → LUMO+5 | 12.69 |
|        |        | HOMO → LUMO+9   | 11.29 |
|        |        | HOMO-1 → LUMO+5 | 10.21 |

|        |        |                  |       |
|--------|--------|------------------|-------|
|        |        | HOMO-1 → LUMO+6  | 9.72  |
|        |        | HOMO → LUMO+7    | 8.46  |
|        |        | HOMO-1 → LUMO+7  | 5.42  |
| 216.11 | 0.0532 | HOMO-1 → LUMO+7  | 13.50 |
|        |        | HOMO → LUMO+10   | 13.05 |
|        |        | HOMO → LUMO+9    | 12.20 |
|        |        | HOMO-3 → LUMO+4  | 11.06 |
|        |        | HOMO → LUMO+8    | 10.93 |
| 215.21 | 0.0295 | HOMO-2 → LUMO+5  | 22.42 |
|        |        | HOMO → LUMO+10   | 9.78  |
|        |        | HOMO-2 → LUMO+10 | 8.68  |
|        |        | HOMO-2 → LUMO+4  | 8.25  |
|        |        | HOMO → LUMO+9    | 7.25  |
| 213.06 | 0.0165 | HOMO-1 → LUMO+7  | 47.86 |
|        |        | HOMO-1 → LUMO+5  | 7.54  |
|        |        | HOMO-1 → LUMO+8  | 6.54  |
|        |        | HOMO-9 → LUMO    | 5.37  |
|        |        | HOMO-1 → LUMO+4  | 5.11  |
| 211.75 | 0.0031 | HOMO-9 → LUMO    | 88.98 |
| 210.91 | 0.0171 | HOMO-3 → LUMO+4  | 25.38 |
|        |        | HOMO-1 → LUMO+5  | 12.42 |
|        |        | HOMO-8 → LUMO    | 9.92  |
|        |        | HOMO-4 → LUMO+1  | 9.42  |
|        |        | HOMO-1 → LUMO+9  | 8.94  |
| 210.59 | 0.0409 | HOMO-8 → LUMO    | 31.21 |
|        |        | HOMO-1 → LUMO+9  | 19.99 |
|        |        | HOMO-4 → LUMO+1  | 14.74 |
|        |        | HOMO-1 → LUMO+6  | 7.62  |
|        |        | HOMO-1 → LUMO+5  | 7.22  |
|        |        | HOMO-1 → LUMO+10 | 5.22  |
| 210.20 | 0.0408 | HOMO-3 → LUMO+4  | 31.49 |
|        |        | HOMO → LUMO+8    | 14.92 |
|        |        | HOMO-8 → LUMO    | 10.14 |
|        |        | HOMO-1 → LUMO+5  | 8.86  |
|        |        | HOMO-4 → LUMO+1  | 8.16  |
| 208.12 | 0.0112 | HOMO → LUMO+8    | 46.71 |
|        |        | HOMO → LUMO+10   | 12.19 |
|        |        | HOMO-2 → LUMO+7  | 9.41  |
|        |        | HOMO → LUMO+7    | 7.14  |
|        |        | HOMO-2 → LUMO+6  | 5.07  |
| 207.76 | 0.0280 | HOMO-1 → LUMO+9  | 12.96 |
|        |        | HOMO → LUMO+9    | 11.54 |
|        |        | HOMO → LUMO+8    | 11.31 |
|        |        | HOMO-2 → LUMO+7  | 9.60  |
|        |        | HOMO-3 → LUMO+4  | 9.17  |
|        |        | HOMO-2 → LUMO+9  | 8.93  |

|        |        |                  |       |
|--------|--------|------------------|-------|
|        |        | HOMO-1 → LUMO+10 | 7.01  |
|        |        | HOMO-2 → LUMO+6  | 5.16  |
| 205.30 | 0.0081 | HOMO-4 → LUMO+2  | 85.26 |
| 203.96 | 0.0041 | HOMO-5 → LUMO+1  | 60.00 |
|        |        | HOMO-5 → LUMO+2  | 24.15 |
|        |        | HOMO-4 → LUMO+2  | 6.00  |
| 202.72 | 0.0092 | HOMO-1 → LUMO+9  | 18.78 |
|        |        | HOMO-3 → LUMO+5  | 13.06 |
|        |        | HOMO-1 → LUMO+6  | 12.54 |
|        |        | HOMO-3 → LUMO+6  | 12.47 |
|        |        | HOMO-2 → LUMO+7  | 6.83  |
|        |        | HOMO-5 → LUMO+1  | 6.21  |
| 201.88 | 0.0210 | HOMO-6 → LUMO+2  | 18.39 |
|        |        | HOMO-2 → LUMO+7  | 14.66 |
|        |        | HOMO-6 → LUMO+1  | 7.74  |
|        |        | HOMO-5 → LUMO+2  | 7.10  |
|        |        | HOMO-5 → LUMO+1  | 6.49  |
|        |        | HOMO-2 → LUMO+9  | 5.80  |
| 201.81 | 0.0037 | HOMO-5 → LUMO+2  | 54.84 |
|        |        | HOMO-5 → LUMO+1  | 14.77 |
|        |        | HOMO-3 → LUMO+5  | 5.64  |
| 201.06 | 0.0650 | HOMO-5 → LUMO+1  | 41.94 |
|        |        | HOMO-5 → LUMO    | 7.05  |
|        |        | HOMO-2 → LUMO+7  | 6.54  |
|        |        | HOMO-1 → LUMO+6  | 5.40  |
| 200.33 | 0.0147 | HOMO-4 → LUMO+3  | 75.73 |
|        |        | HOMO-8 → LUMO    | 5.75  |
|        |        | HOMO-4 → LUMO+1  | 5.05  |

**Table S26.** Calculated transitions (with a contribution greater than 5%) for [Re(CO)<sub>3</sub>(MeQ)HPhpz] (**8**)

| Wavelength [nm] | Oscillator strength | Main components | %     |
|-----------------|---------------------|-----------------|-------|
| 404.73          | 0.0719              | HOMO → LUMO     | 97.55 |
| 340.37          | 0.0559              | HOMO-1 → LUMO   | 94.21 |
| 325.81          | 0.0017              | HOMO-2 → LUMO   | 94.25 |
| 324.62          | 0.0026              | HOMO → LUMO+1   | 92.16 |
| 306.40          | 0.0038              | HOMO-3 → LUMO   | 88.80 |
| 301.82          | 0.0072              | HOMO → LUMO+2   | 69.83 |
|                 |                     | HOMO-5 → LUMO   | 15.02 |
| 296.03          | 0.0143              | HOMO → LUMO+3   | 62.88 |
|                 |                     | HOMO-5 → LUMO   | 6.41  |
| 287.04          | 0.2086              | HOMO-1 → LUMO+1 | 55.54 |
|                 |                     | HOMO → LUMO+5   | 13.43 |
|                 |                     | HOMO → LUMO+3   | 8.14  |
|                 |                     | HOMO-1 → LUMO+3 | 7.38  |
| 280.28          | 0.0218              | HOMO-1 → LUMO+3 | 45.00 |
|                 |                     | HOMO-1 → LUMO+2 | 17.69 |
|                 |                     | HOMO-1 → LUMO+1 | 8.55  |
|                 |                     | HOMO-1 → LUMO+5 | 7.54  |
| 277.09          | 0.1666              | HOMO → LUMO+5   | 44.48 |
|                 |                     | HOMO-1 → LUMO+1 | 22.35 |
|                 |                     | HOMO-1 → LUMO+5 | 8.33  |
| 271.09          | 0.0128              | HOMO-2 → LUMO+1 | 45.93 |
|                 |                     | HOMO-2 → LUMO+3 | 20.36 |
|                 |                     | HOMO-1 → LUMO+3 | 7.50  |
| 267.73          | 0.0021              | HOMO-2 → LUMO+1 | 33.18 |
|                 |                     | HOMO-2 → LUMO+5 | 14.14 |
|                 |                     | HOMO-4 → LUMO   | 13.09 |
|                 |                     | HOMO-2 → LUMO+3 | 12.17 |
|                 |                     | HOMO-2 → LUMO+2 | 10.54 |
| 265.55          | 0.0401              | HOMO-4 → LUMO   | 73.85 |
| 261.25          | 0.0009              | HOMO → LUMO+4   | 88.22 |
| 260.03          | 0.0406              | HOMO-1 → LUMO+2 | 24.54 |
|                 |                     | HOMO-1 → LUMO+3 | 10.49 |
|                 |                     | HOMO → LUMO+5   | 10.18 |
|                 |                     | HOMO-1 → LUMO+5 | 9.83  |
|                 |                     | HOMO-2 → LUMO+5 | 7.43  |
|                 |                     | HOMO-5 → LUMO   | 6.20  |
| 258.15          | 0.0792              | HOMO-5 → LUMO   | 27.07 |
|                 |                     | HOMO-3 → LUMO+1 | 16.20 |
|                 |                     | HOMO-1 → LUMO+5 | 10.57 |
|                 |                     | HOMO → LUMO+2   | 7.16  |
|                 |                     | HOMO-2 → LUMO+2 | 7.09  |
|                 |                     | HOMO-2 → LUMO+5 | 6.92  |
| 256.57          | 0.1165              | HOMO-3 → LUMO+1 | 64.90 |

|        |        |                 |       |
|--------|--------|-----------------|-------|
|        |        | HOMO → LUMO+5   | 7.10  |
|        |        | HOMO-5 → LUMO   | 5.95  |
| 249.99 | 0.1120 | HOMO-1 → LUMO+2 | 38.00 |
|        |        | HOMO-5 → LUMO   | 14.92 |
|        |        | HOMO-2 → LUMO+5 | 7.83  |
|        |        | HOMO-3 → LUMO+2 | 7.78  |
|        |        | HOMO-1 → LUMO+3 | 5.76  |
| 248.80 | 0.0099 | HOMO-1 → LUMO+4 | 46.93 |
|        |        | HOMO-6 → LUMO+1 | 28.87 |
|        |        | HOMO-4 → LUMO+4 | 10.18 |
| 247.66 | 0.0132 | HOMO-2 → LUMO+5 | 21.70 |
|        |        | HOMO-2 → LUMO+3 | 21.61 |
|        |        | HOMO-1 → LUMO+5 | 20.16 |
|        |        | HOMO-2 → LUMO+1 | 5.80  |
|        |        | HOMO-1 → LUMO+7 | 5.75  |
| 244.14 | 0.0308 | HOMO-3 → LUMO+3 | 46.59 |
|        |        | HOMO-3 → LUMO+2 | 10.11 |
|        |        | HOMO → LUMO+7   | 7.16  |
| 239.54 | 0.0078 | HOMO-2 → LUMO+2 | 63.90 |
|        |        | HOMO-2 → LUMO+5 | 21.03 |
|        |        | HOMO-2 → LUMO+3 | 8.99  |
| 238.23 | 0.0481 | HOMO → LUMO+6   | 38.92 |
|        |        | HOMO-4 → LUMO+1 | 23.07 |
|        |        | HOMO → LUMO+7   | 8.45  |
|        |        | HOMO → LUMO+8   | 7.08  |
| 237.12 | 0.0005 | HOMO-6 → LUMO   | 96.64 |
| 235.71 | 0.1517 | HOMO → LUMO+6   | 20.71 |
|        |        | HOMO-3 → LUMO+5 | 17.14 |
|        |        | HOMO → LUMO+7   | 14.93 |
|        |        | HOMO-3 → LUMO+2 | 13.11 |
|        |        | HOMO-4 → LUMO+1 | 12.30 |
| 233.64 | 0.0789 | HOMO-4 → LUMO+1 | 52.58 |
|        |        | HOMO-3 → LUMO+3 | 13.42 |
|        |        | HOMO-3 → LUMO+5 | 6.07  |
| 232.98 | 0.0603 | HOMO → LUMO+8   | 22.91 |
|        |        | HOMO-3 → LUMO+2 | 22.00 |
|        |        | HOMO → LUMO+6   | 16.19 |
|        |        | HOMO → LUMO+7   | 5.55  |
| 229.94 | 0.0279 | HOMO-3 → LUMO+5 | 27.70 |
|        |        | HOMO → LUMO+7   | 16.32 |
|        |        | HOMO → LUMO+8   | 11.35 |
|        |        | HOMO-3 → LUMO+2 | 10.71 |
| 229.42 | 0.0010 | HOMO-7 → LUMO   | 70.94 |
|        |        | HOMO-8 → LUMO   | 17.70 |
| 227.98 | 0.0489 | HOMO-1 → LUMO+4 | 22.95 |
|        |        | HOMO-6 → LUMO+1 | 18.53 |

|        |        |                  |       |
|--------|--------|------------------|-------|
|        |        | HOMO-1 → LUMO+6  | 10.49 |
|        |        | HOMO → LUMO+7    | 9.35  |
| 226.04 | 0.2296 | HOMO-1 → LUMO+4  | 12.43 |
|        |        | HOMO-3 → LUMO+2  | 12.35 |
|        |        | HOMO → LUMO+8    | 10.40 |
|        |        | HOMO-6 → LUMO+1  | 8.73  |
|        |        | HOMO → LUMO+7    | 8.72  |
|        |        | HOMO → LUMO+9    | 6.72  |
|        |        | HOMO-3 → LUMO+5  | 5.50  |
| 225.14 | 0.0123 | HOMO-8 → LUMO    | 67.20 |
|        |        | HOMO-7 → LUMO    | 17.80 |
|        |        | HOMO-5 → LUMO+1  | 5.27  |
| 224.91 | 0.0068 | HOMO-5 → LUMO+1  | 91.07 |
| 223.26 | 0.0147 | HOMO-1 → LUMO+6  | 24.52 |
|        |        | HOMO-1 → LUMO+9  | 15.53 |
|        |        | HOMO-1 → LUMO+4  | 6.92  |
|        |        | HOMO-2 → LUMO+6  | 6.21  |
|        |        | HOMO-2 → LUMO+7  | 6.16  |
|        |        | HOMO-6 → LUMO+1  | 5.00  |
| 222.21 | 0.0446 | HOMO → LUMO+9    | 38.33 |
|        |        | HOMO → LUMO+11   | 10.57 |
|        |        | HOMO → LUMO+8    | 8.48  |
|        |        | HOMO-2 → LUMO+9  | 5.79  |
| 220.34 | 0.0239 | HOMO-2 → LUMO+4  | 60.12 |
|        |        | HOMO → LUMO+11   | 7.03  |
|        |        | HOMO-2 → LUMO+3  | 5.18  |
| 218.83 | 0.0232 | HOMO-2 → LUMO+4  | 24.03 |
|        |        | HOMO-1 → LUMO+7  | 13.83 |
|        |        | HOMO → LUMO+11   | 11.70 |
|        |        | HOMO-2 → LUMO+9  | 8.60  |
|        |        | HOMO-1 → LUMO+8  | 6.71  |
|        |        | HOMO-3 → LUMO+5  | 5.17  |
| 215.94 | 0.0209 | HOMO-2 → LUMO+7  | 30.25 |
|        |        | HOMO-2 → LUMO+12 | 15.28 |
| 214.16 | 0.0051 | HOMO-4 → LUMO+2  | 28.46 |
|        |        | HOMO-11 → LUMO   | 22.21 |
|        |        | HOMO-9 → LUMO    | 17.18 |
|        |        | HOMO-4 → LUMO+3  | 7.84  |
|        |        | HOMO-5 → LUMO+2  | 6.31  |
| 213.81 | 0.0056 | HOMO → LUMO+12   | 13.73 |
|        |        | HOMO-1 → LUMO+9  | 12.49 |
|        |        | HOMO-7 → LUMO+1  | 11.89 |
|        |        | HOMO-2 → LUMO+6  | 6.27  |
|        |        | HOMO-3 → LUMO+6  | 5.63  |
| 213.40 | 0.0024 | HOMO-4 → LUMO+2  | 32.85 |
|        |        | HOMO-11 → LUMO   | 27.86 |



|        |        |                  |       |
|--------|--------|------------------|-------|
|        |        | HOMO-9 → LUMO    | 7.89  |
|        |        | HOMO-4 → LUMO+3  | 6.57  |
| 212.87 | 0.0136 | HOMO-3 → LUMO+4  | 67.14 |
| 212.68 | 0.0095 | HOMO-1 → LUMO+9  | 19.08 |
|        |        | HOMO-7 → LUMO+1  | 16.18 |
|        |        | HOMO-3 → LUMO+4  | 9.44  |
|        |        | HOMO-1 → LUMO+11 | 7.17  |
|        |        | HOMO-11 → LUMO   | 6.80  |
|        |        | HOMO-1 → LUMO+6  | 6.79  |
| 211.90 | 0.0064 | HOMO → LUMO+9    | 11.47 |
|        |        | HOMO-2 → LUMO+6  | 9.25  |
|        |        | HOMO → LUMO+10   | 8.32  |
|        |        | HOMO → LUMO+11   | 7.45  |
|        |        | HOMO-1 → LUMO+9  | 6.74  |
|        |        | HOMO-2 → LUMO+9  | 6.41  |
| 210.74 | 0.0427 | HOMO-5 → LUMO+2  | 26.21 |
|        |        | HOMO-9 → LUMO    | 23.55 |
|        |        | HOMO-10 → LUMO   | 15.39 |
|        |        | HOMO-11 → LUMO   | 8.03  |
|        |        | HOMO-1 → LUMO+11 | 6.07  |
| 209.61 | 0.0098 | HOMO-4 → LUMO+3  | 45.48 |
|        |        | HOMO-4 → LUMO+2  | 8.10  |
|        |        | HOMO-2 → LUMO+6  | 5.11  |
| 209.14 | 0.0311 | HOMO-1 → LUMO+7  | 22.29 |
|        |        | HOMO-4 → LUMO+3  | 13.14 |
|        |        | HOMO-1 → LUMO+11 | 11.00 |
|        |        | HOMO-1 → LUMO+8  | 10.83 |
|        |        | HOMO-2 → LUMO+11 | 8.22  |
|        |        | HOMO-4 → LUMO+2  | 7.27  |
|        |        | HOMO-2 → LUMO+8  | 5.05  |
| 208.06 | 0.0148 | HOMO → LUMO+10   | 37.70 |
|        |        | HOMO-7 → LUMO+1  | 21.77 |
|        |        | HOMO-1 → LUMO+11 | 9.32  |
| 207.35 | 0.0101 | HOMO → LUMO+10   | 27.76 |
|        |        | HOMO → LUMO+12   | 14.41 |
|        |        | HOMO-2 → LUMO+9  | 5.98  |
|        |        | HOMO-2 → LUMO+12 | 5.24  |
|        |        | HOMO-2 → LUMO+8  | 5.28  |
|        |        | HOMO-1 → LUMO+11 | 5.09  |
| 206.48 | 0.0853 | HOMO-7 → LUMO+1  | 21.67 |
|        |        | HOMO → LUMO+11   | 11.70 |
|        |        | HOMO-1 → LUMO+6  | 9.73  |
|        |        | HOMO-1 → LUMO+11 | 6.03  |
|        |        | HOMO → LUMO+10   | 5.25  |
| 204.11 | 0.0098 | HOMO-5 → LUMO+3  | 74.48 |
|        |        | HOMO-5 → LUMO+2  | 8.95  |

|        |        |                  |       |
|--------|--------|------------------|-------|
|        |        | HOMO-9 → LUMO    | 5.72  |
| 203.18 | 0.0088 | HOMO-4 → LUMO+5  | 22.42 |
|        |        | HOMO-3 → LUMO+7  | 15.51 |
|        |        | HOMO-3 → LUMO+6  | 13.12 |
|        |        | HOMO-3 → LUMO+8  | 11.57 |
| 201.67 | 0.0061 | HOMO-4 → LUMO+5  | 25.05 |
|        |        | HOMO-1 → LUMO+11 | 18.47 |
|        |        | HOMO-1 → LUMO+8  | 17.70 |
| 200.89 | 0.0699 | HOMO-4 → LUMO+4  | 45.31 |
|        |        | HOMO-3 → LUMO+6  | 17.05 |
|        |        | HOMO-6 → LUMO+1  | 12.72 |
|        |        | HOMO → LUMO+11   | 5.18  |
| 200.09 | 0.1348 | HOMO-3 → LUMO+6  | 20.76 |
|        |        | HOMO-4 → LUMO+4  | 17.24 |
|        |        | HOMO-4 → LUMO+5  | 10.55 |
|        |        | HOMO-6 → LUMO+1  | 7.81  |
|        |        | HOMO-2 → LUMO+11 | 5.08  |

**Table S27.** Calculated transitions (with a contribution greater than 5%) for [Re(CO)<sub>3</sub>(ClQ)Him] (**9**)

| Wavelength [nm] | Oscillator strength | Main components | %     |
|-----------------|---------------------|-----------------|-------|
| 439.35          | 0.1025              | HOMO → LUMO     | 98.03 |
| 347.72          | 0.0438              | HOMO-1 → LUMO   | 82.32 |
|                 |                     | HOMO-2 → LUMO   | 14.10 |
| 342.07          | 0.0303              | HOMO-2 → LUMO   | 83.57 |
|                 |                     | HOMO-1 → LUMO   | 13.15 |
| 321.59          | 0.0128              | HOMO-3 → LUMO   | 96.70 |
| 318.23          | 0.0469              | HOMO → LUMO+1   | 87.57 |
|                 |                     | HOMO-5 → LUMO   | 9.58  |
| 308.53          | 0.0008              | HOMO → LUMO+2   | 83.18 |
|                 |                     | HOMO-3 → LUMO+2 | 9.12  |
| 285.97          | 0.0078              | HOMO → LUMO+3   | 56.59 |
|                 |                     | HOMO-1 → LUMO+2 | 30.28 |
|                 |                     | HOMO-3 → LUMO+3 | 5.44  |
| 276.90          | 0.0136              | HOMO-1 → LUMO+2 | 37.19 |
|                 |                     | HOMO-2 → LUMO+2 | 26.12 |
|                 |                     | HOMO-1 → LUMO+3 | 18.41 |
|                 |                     | HOMO → LUMO+3   | 8.58  |
| 270.26          | 0.0191              | HOMO-2 → LUMO+2 | 23.22 |
|                 |                     | HOMO → LUMO+3   | 19.03 |
|                 |                     | HOMO-1 → LUMO+2 | 18.34 |
|                 |                     | HOMO-4 → LUMO   | 12.51 |
|                 |                     | HOMO-1 → LUMO+3 | 10.91 |
| 269.58          | 0.0072              | HOMO-4 → LUMO   | 86.85 |
| 264.48          | 0.0143              | HOMO-1 → LUMO+1 | 74.76 |
|                 |                     | HOMO-5 → LUMO   | 13.40 |
| 262.55          | 0.0133              | HOMO-2 → LUMO+3 | 44.55 |
|                 |                     | HOMO-1 → LUMO+3 | 33.92 |
|                 |                     | HOMO-2 → LUMO+2 | 5.93  |
| 258.13          | 0.0098              | HOMO-2 → LUMO+1 | 66.80 |
|                 |                     | HOMO-1 → LUMO+1 | 14.71 |
|                 |                     | HOMO-5 → LUMO   | 7.65  |
| 253.46          | 0.0157              | HOMO → LUMO+4   | 40.58 |
|                 |                     | HOMO-2 → LUMO+1 | 10.84 |
|                 |                     | HOMO-2 → LUMO+3 | 7.57  |
|                 |                     | HOMO-3 → LUMO+2 | 6.74  |
|                 |                     | HOMO-1 → LUMO+3 | 6.39  |
|                 |                     | HOMO-2 → LUMO+2 | 5.13  |
| 253.07          | 0.0225              | HOMO-2 → LUMO+3 | 28.51 |
|                 |                     | HOMO-2 → LUMO+2 | 16.09 |
|                 |                     | HOMO-1 → LUMO+3 | 8.92  |
|                 |                     | HOMO → LUMO+4   | 7.56  |
|                 |                     | HOMO-5 → LUMO   | 5.55  |
|                 |                     | HOMO-3 → LUMO+1 | 5.34  |
| 251.38          | 0.0166              | HOMO-3 → LUMO+2 | 38.58 |
|                 |                     | HOMO-3 → LUMO+1 | 28.42 |
|                 |                     | HOMO-5 → LUMO   | 8.68  |

|        |        |                 |       |
|--------|--------|-----------------|-------|
|        |        | HOMO → LUMO+2   | 6.19  |
|        |        | HOMO-2 → LUMO+1 | 5.90  |
| 248.14 | 0.0312 | HOMO → LUMO+4   | 37.02 |
|        |        | HOMO-3 → LUMO+2 | 28.42 |
|        |        | HOMO-3 → LUMO+1 | 15.30 |
| 242.01 | 0.1306 | HOMO → LUMO+5   | 36.11 |
|        |        | HOMO-5 → LUMO   | 25.67 |
|        |        | HOMO-3 → LUMO+1 | 20.89 |
| 239.48 | 0.1074 | HOMO → LUMO+6   | 26.89 |
|        |        | HOMO-3 → LUMO+3 | 22.50 |
|        |        | HOMO-5 → LUMO   | 10.05 |
|        |        | HOMO-3 → LUMO+1 | 8.27  |
|        |        | HOMO → LUMO+5   | 7.60  |
|        |        | HOMO-3 → LUMO+6 | 5.64  |
| 235.30 | 0.0194 | HOMO-3 → LUMO+3 | 34.62 |
|        |        | HOMO-1 → LUMO+4 | 10.36 |
|        |        | HOMO → LUMO+6   | 6.63  |
|        |        | HOMO → LUMO+5   | 6.33  |
|        |        | HOMO-1 → LUMO+6 | 5.10  |
| 233.26 | 0.0049 | HOMO-6 → LUMO   | 90.42 |
| 232.54 | 0.3433 | HOMO → LUMO+5   | 25.21 |
|        |        | HOMO → LUMO+6   | 22.08 |
|        |        | HOMO → LUMO+7   | 9.25  |
|        |        | HOMO-5 → LUMO   | 7.17  |
|        |        | HOMO-1 → LUMO+4 | 6.60  |
|        |        | HOMO-3 → LUMO+1 | 6.31  |
| 229.64 | 0.0207 | HOMO → LUMO+7   | 51.19 |
|        |        | HOMO → LUMO+6   | 14.11 |
|        |        | HOMO-2 → LUMO+7 | 5.02  |
| 227.87 | 0.0387 | HOMO-1 → LUMO+4 | 38.08 |
|        |        | HOMO-1 → LUMO+7 | 14.02 |
|        |        | HOMO-2 → LUMO+4 | 11.44 |
| 224.22 | 0.0018 | HOMO → LUMO+8   | 64.17 |
|        |        | HOMO → LUMO+9   | 23.97 |
| 222.57 | 0.0255 | HOMO-2 → LUMO+5 | 23.55 |
|        |        | HOMO-2 → LUMO+4 | 20.71 |
|        |        | HOMO-2 → LUMO+7 | 10.01 |
|        |        | HOMO-2 → LUMO+6 | 9.98  |
|        |        | HOMO → LUMO+7   | 7.00  |
|        |        | HOMO-1 → LUMO+5 | 5.54  |
| 220.41 | 0.0227 | HOMO → LUMO+9   | 32.35 |
|        |        | HOMO-2 → LUMO+4 | 10.90 |
|        |        | HOMO → LUMO+12  | 8.41  |
|        |        | HOMO → LUMO+11  | 6.55  |
|        |        | HOMO-3 → LUMO+8 | 6.25  |
|        |        | HOMO → LUMO+8   | 5.14  |
| 217.79 | 0.0308 | HOMO-1 → LUMO+7 | 11.68 |
|        |        | HOMO → LUMO+11  | 9.18  |
|        |        | HOMO-1 → LUMO+4 | 8.04  |

|        |        |                  |       |
|--------|--------|------------------|-------|
|        |        | HOMO-2 → LUMO+5  | 7.68  |
|        |        | HOMO-1 → LUMO+5  | 7.21  |
|        |        | HOMO-1 → LUMO+6  | 5.75  |
|        |        | HOMO-2 → LUMO+8  | 5.10  |
| 216.70 | 0.0038 | HOMO-4 → LUMO+1  | 95.62 |
| 216.12 | 0.0438 | HOMO-2 → LUMO+4  | 18.55 |
|        |        | HOMO-1 → LUMO+4  | 8.51  |
|        |        | HOMO-2 → LUMO+5  | 8.44  |
|        |        | HOMO → LUMO+11   | 8.34  |
|        |        | HOMO-2 → LUMO+11 | 7.69  |
|        |        | HOMO → LUMO+7    | 7.17  |
|        |        | HOMO-1 → LUMO+6  | 6.16  |
| 214.06 | 0.0069 | HOMO-1 → LUMO+7  | 21.91 |
|        |        | HOMO-1 → LUMO+4  | 14.45 |
|        |        | HOMO-1 → LUMO+5  | 9.24  |
|        |        | HOMO-1 → LUMO+8  | 8.46  |
|        |        | HOMO-1 → LUMO+9  | 7.94  |
|        |        | HOMO-7 → LUMO    | 5.16  |
| 212.59 | 0.0068 | HOMO-7 → LUMO    | 76.82 |
|        |        | HOMO-5 → LUMO+1  | 5.39  |
| 212.20 | 0.0158 | HOMO-3 → LUMO+4  | 31.19 |
|        |        | HOMO-11 → LUMO   | 9.37  |
|        |        | HOMO-10 → LUMO   | 9.18  |
|        |        | HOMO-8 → LUMO    | 8.64  |
| 211.74 | 0.0206 | HOMO-8 → LUMO    | 21.72 |
|        |        | HOMO-11 → LUMO   | 20.44 |
|        |        | HOMO-10 → LUMO   | 20.27 |
|        |        | HOMO-3 → LUMO+4  | 14.93 |
| 211.36 | 0.0204 | HOMO-1 → LUMO+5  | 23.90 |
|        |        | HOMO-1 → LUMO+11 | 22.63 |
|        |        | HOMO-1 → LUMO+6  | 12.78 |
|        |        | HOMO → LUMO+11   | 8.27  |
|        |        | HOMO-2 → LUMO+6  | 6.84  |
| 209.18 | 0.0085 | HOMO-4 → LUMO+2  | 60.11 |
| 208.56 | 0.0113 | HOMO-4 → LUMO+2  | 34.01 |
|        |        | HOMO-2 → LUMO+11 | 7.94  |
|        |        | HOMO-2 → LUMO+6  | 6.11  |
|        |        | HOMO-2 → LUMO+5  | 5.47  |
|        |        | HOMO-2 → LUMO+7  | 5.01  |
| 208.07 | 0.0040 | HOMO → LUMO+10   | 62.68 |
|        |        | HOMO-3 → LUMO+4  | 12.29 |
| 205.79 | 0.0128 | HOMO → LUMO+12   | 23.78 |
|        |        | HOMO → LUMO+10   | 14.49 |
|        |        | HOMO → LUMO+9    | 13.25 |
|        |        | HOMO-3 → LUMO+4  | 5.88  |
| 205.28 | 0.0002 | HOMO-9 → LUMO    | 95.00 |
| 204.92 | 0.0558 | HOMO-5 → LUMO+1  | 24.91 |
|        |        | HOMO-8 → LUMO    | 20.34 |
|        |        | HOMO-10 → LUMO   | 14.51 |

|        |        |                  |       |
|--------|--------|------------------|-------|
|        |        | HOMO-2 → LUMO+7  | 7.77  |
| 203.38 | 0.0079 | HOMO-2 → LUMO+7  | 25.66 |
|        |        | HOMO-8 → LUMO    | 8.53  |
|        |        | HOMO-2 → LUMO+12 | 5.98  |
|        |        | HOMO-2 → LUMO+4  | 5.93  |
|        |        | HOMO-5 → LUMO+1  | 5.73  |
| 202.60 | 0.0219 | HOMO-3 → LUMO+5  | 21.58 |
|        |        | HOMO-3 → LUMO+6  | 16.60 |
|        |        | HOMO-1 → LUMO+10 | 12.05 |
|        |        | HOMO → LUMO+12   | 11.59 |
|        |        | HOMO-3 → LUMO+4  | 6.65  |
| 201.13 | 0.0067 | HOMO-4 → LUMO+3  | 50.91 |
|        |        | HOMO-1 → LUMO+7  | 8.50  |
|        |        | HOMO → LUMO+11   | 8.25  |

**Table S28.** Calculated transitions (with a contribution greater than 5%) for [Re(CO)<sub>3</sub>(ClQ)MeHim] (**10**)

| Wavelength [nm] | Oscillator strength | Main components | %     |
|-----------------|---------------------|-----------------|-------|
| 443.56          | 0.0997              | HOMO → LUMO     | 98.11 |
| 348.27          | 0.0353              | HOMO-1 → LUMO   | 81.50 |
|                 |                     | HOMO-2 → LUMO   | 13.85 |
| 341.98          | 0.0361              | HOMO-2 → LUMO   | 82.92 |
|                 |                     | HOMO-1 → LUMO   | 13.35 |
| 326.24          | 0.0080              | HOMO-3 → LUMO   | 94.87 |
| 319.14          | 0.0448              | HOMO → LUMO+1   | 87.60 |
|                 |                     | HOMO-5 → LUMO   | 9.25  |
| 310.34          | 0.0012              | HOMO → LUMO+2   | 83.71 |
|                 |                     | HOMO-3 → LUMO+2 | 6.77  |
| 287.65          | 0.0129              | HOMO-4 → LUMO   | 97.68 |
| 285.89          | 0.0071              | HOMO → LUMO+3   | 59.20 |
|                 |                     | HOMO-1 → LUMO+2 | 28.29 |
| 275.14          | 0.0170              | HOMO-1 → LUMO+2 | 34.28 |
|                 |                     | HOMO-2 → LUMO+2 | 25.69 |
|                 |                     | HOMO-1 → LUMO+3 | 15.42 |
|                 |                     | HOMO → LUMO+3   | 11.15 |
|                 |                     | HOMO-2 → LUMO+3 | 7.23  |
| 270.01          | 0.0192              | HOMO-2 → LUMO+2 | 25.16 |
|                 |                     | HOMO-1 → LUMO+2 | 23.24 |
|                 |                     | HOMO → LUMO+2   | 17.63 |
|                 |                     | HOMO-1 → LUMO+3 | 15.52 |
| 263.39          | 0.0183              | HOMO-1 → LUMO+1 | 65.94 |
|                 |                     | HOMO-5 → LUMO   | 15.05 |
|                 |                     | HOMO-2 → LUMO+1 | 8.81  |
| 260.80          | 0.0152              | HOMO-2 → LUMO+3 | 33.88 |
|                 |                     | HOMO-1 → LUMO+3 | 33.14 |
|                 |                     | HOMO-2 → LUMO+1 | 8.64  |
|                 |                     | HOMO-3 → LUMO+3 | 8.57  |
| 258.45          | 0.0080              | HOMO-2 → LUMO+1 | 47.39 |
|                 |                     | HOMO-1 → LUMO+1 | 27.66 |
|                 |                     | HOMO-5 → LUMO   | 9.45  |
| 252.85          | 0.0371              | HOMO-2 → LUMO+3 | 31.06 |
|                 |                     | HOMO-2 → LUMO+2 | 21.88 |
|                 |                     | HOMO-1 → LUMO+3 | 10.40 |
|                 |                     | HOMO-3 → LUMO+1 | 7.27  |
|                 |                     | HOMO-1 → LUMO+6 | 5.29  |
| 252.43          | 0.0080              | HOMO-3 → LUMO+2 | 67.97 |
|                 |                     | HOMO → LUMO+2   | 9.16  |
| 251.80          | 0.0167              | HOMO-3 → LUMO+1 | 45.65 |
|                 |                     | HOMO-2 → LUMO+1 | 23.05 |
|                 |                     | HOMO-5 → LUMO   | 10.81 |
|                 |                     | HOMO-2 → LUMO+3 | 7.87  |
| 245.20          | 0.0070              | HOMO → LUMO+4   | 70.31 |
|                 |                     | HOMO-3 → LUMO+1 | 7.29  |
| 242.08          | 0.1446              | HOMO → LUMO+5   | 33.04 |

|        |        |                  |       |
|--------|--------|------------------|-------|
|        |        | HOMO-5 → LUMO    | 26.62 |
|        |        | HOMO-3 → LUMO+1  | 14.62 |
|        |        | HOMO → LUMO+4    | 6.19  |
| 239.59 | 0.0716 | HOMO → LUMO+6    | 39.59 |
|        |        | HOMO-3 → LUMO+3  | 19.17 |
|        |        | HOMO-3 → LUMO+6  | 7.47  |
|        |        | HOMO-5 → LUMO    | 7.09  |
| 235.20 | 0.0464 | HOMO-3 → LUMO+3  | 25.61 |
|        |        | HOMO-6 → LUMO    | 21.47 |
|        |        | HOMO → LUMO+5    | 8.91  |
|        |        | HOMO-1 → LUMO+4  | 6.24  |
| 234.72 | 0.0064 | HOMO-6 → LUMO    | 72.88 |
|        |        | HOMO-3 → LUMO+3  | 9.44  |
| 233.41 | 0.3575 | HOMO → LUMO+5    | 36.11 |
|        |        | HOMO → LUMO+6    | 23.68 |
|        |        | HOMO-5 → LUMO    | 8.80  |
|        |        | HOMO-3 → LUMO+1  | 8.37  |
| 227.46 | 0.0154 | HOMO-1 → LUMO+4  | 41.50 |
|        |        | HOMO-1 → LUMO+7  | 9.49  |
|        |        | HOMO-4 → LUMO+1  | 7.86  |
|        |        | HOMO-2 → LUMO+4  | 5.15  |
| 227.29 | 0.0281 | HOMO-4 → LUMO+1  | 88.33 |
| 225.44 | 0.0005 | HOMO → LUMO+7    | 48.91 |
|        |        | HOMO → LUMO+4    | 8.88  |
|        |        | HOMO-2 → LUMO+6  | 5.04  |
| 224.76 | 0.0027 | HOMO → LUMO+9    | 53.58 |
|        |        | HOMO → LUMO+8    | 31.45 |
| 221.14 | 0.0328 | HOMO → LUMO+7    | 18.53 |
|        |        | HOMO-2 → LUMO+5  | 16.84 |
|        |        | HOMO-2 → LUMO+6  | 10.41 |
|        |        | HOMO-1 → LUMO+5  | 8.97  |
|        |        | HOMO-3 → LUMO+5  | 7.91  |
|        |        | HOMO-2 → LUMO+4  | 7.56  |
| 220.43 | 0.0082 | HOMO-4 → LUMO+2  | 73.70 |
| 219.57 | 0.0205 | HOMO → LUMO+10   | 14.80 |
|        |        | HOMO-4 → LUMO+2  | 13.96 |
|        |        | HOMO → LUMO+11   | 10.94 |
|        |        | HOMO-2 → LUMO+4  | 9.44  |
|        |        | HOMO → LUMO+8    | 7.64  |
|        |        | HOMO → LUMO+9    | 7.04  |
|        |        | HOMO → LUMO+12   | 6.30  |
| 216.80 | 0.0458 | HOMO-2 → LUMO+4  | 17.33 |
|        |        | HOMO-2 → LUMO+5  | 12.44 |
|        |        | HOMO → LUMO+7    | 8.66  |
|        |        | HOMO → LUMO+6    | 7.56  |
|        |        | HOMO-2 → LUMO+10 | 7.26  |
|        |        | HOMO-2 → LUMO+8  | 6.11  |
|        |        | HOMO-1 → LUMO+4  | 5.45  |
| 215.26 | 0.0046 | HOMO-1 → LUMO+6  | 16.83 |



|        |        |                  |       |
|--------|--------|------------------|-------|
|        |        | HOMO → LUMO+11   | 12.90 |
|        |        | HOMO-2 → LUMO+4  | 11.63 |
|        |        | HOMO-3 → LUMO+11 | 6.01  |
|        |        | HOMO-2 → LUMO+11 | 5.68  |
| 214.05 | 0.0063 | HOMO-7 → LUMO    | 70.72 |
|        |        | HOMO-8 → LUMO    | 10.52 |
|        |        | HOMO-11 → LUMO   | 8.92  |
| 212.32 | 0.0330 | HOMO-1 → LUMO+5  | 32.31 |
|        |        | HOMO-1 → LUMO+11 | 11.66 |
|        |        | HOMO → LUMO+11   | 10.81 |
|        |        | HOMO-2 → LUMO+6  | 9.35  |
| 211.78 | 0.0051 | HOMO-11 → LUMO   | 31.41 |
|        |        | HOMO-8 → LUMO    | 26.50 |
|        |        | HOMO-7 → LUMO    | 16.21 |
|        |        | HOMO-10 → LUMO   | 11.78 |
| 210.39 | 0.0064 | HOMO-4 → LUMO+3  | 66.90 |
| 209.47 | 0.0094 | HOMO-3 → LUMO+4  | 34.70 |
|        |        | HOMO-1 → LUMO+11 | 8.45  |
|        |        | HOMO-3 → LUMO+6  | 5.59  |
|        |        | HOMO-1 → LUMO+8  | 5.50  |
|        |        | HOMO → LUMO+12   | 5.36  |
| 209.16 | 0.0022 | HOMO → LUMO+8    | 29.67 |
|        |        | HOMO → LUMO+10   | 28.36 |
|        |        | HOMO → LUMO+9    | 23.04 |
| 207.73 | 0.0163 | HOMO-2 → LUMO+5  | 13.73 |
|        |        | HOMO-4 → LUMO+3  | 11.30 |
|        |        | HOMO → LUMO+10   | 10.06 |
|        |        | HOMO → LUMO+12   | 7.56  |
|        |        | HOMO-3 → LUMO+6  | 6.10  |
|        |        | HOMO-1 → LUMO+11 | 5.60  |
|        |        | HOMO-3 → LUMO+5  | 5.46  |
| 205.72 | 0.0158 | HOMO-3 → LUMO+4  | 18.54 |
|        |        | HOMO-1 → LUMO+8  | 9.42  |
|        |        | HOMO-1 → LUMO+11 | 8.52  |
|        |        | HOMO-1 → LUMO+10 | 8.39  |
|        |        | HOMO-2 → LUMO+11 | 8.18  |
|        |        | HOMO → LUMO+12   | 5.48  |
| 205.64 | 0.0012 | HOMO-9 → LUMO    | 84.66 |
| 205.07 | 0.0160 | HOMO-5 → LUMO+1  | 23.20 |
|        |        | HOMO-8 → LUMO    | 18.56 |
|        |        | HOMO-10 → LUMO   | 13.92 |
|        |        | HOMO-9 → LUMO    | 10.08 |
|        |        | HOMO-3 → LUMO+6  | 7.44  |
| 204.78 | 0.0484 | HOMO → LUMO+12   | 16.50 |
|        |        | HOMO-1 → LUMO+7  | 14.70 |
|        |        | HOMO-1 → LUMO+4  | 7.22  |
|        |        | HOMO → LUMO+11   | 7.11  |
| 202.13 | 0.0445 | HOMO-3 → LUMO+5  | 13.70 |
|        |        | HOMO-1 → LUMO+7  | 12.47 |

|                  |       |
|------------------|-------|
| HOMO → LUMO+12   | 11.91 |
| HOMO-3 → LUMO+6  | 11.77 |
| HOMO-1 → LUMO+11 | 9.14  |
| HOMO-1 → LUMO+4  | 6.58  |
| HOMO → LUMO+11   | 5.22  |

**Table S29.** Calculated transitions (with a contribution greater than 5%) for [Re(CO)<sub>3</sub>(ClQ)Hdmpz] (**11**)

| Wavelength [nm] | Oscillator strength | Main components | %     |
|-----------------|---------------------|-----------------|-------|
| 423.37          | 0.1091              | HOMO → LUMO     | 97.34 |
| 356.12          | 0.0609              | HOMO-1 → LUMO   | 95.78 |
| 340.78          | 0.0024              | HOMO-2 → LUMO   | 97.63 |
| 322.34          | 0.0016              | HOMO-3 → LUMO   | 97.09 |
| 311.36          | 0.0360              | HOMO → LUMO+1   | 84.93 |
|                 |                     | HOMO-6 → LUMO   | 6.82  |
|                 |                     | HOMO-5 → LUMO   | 5.06  |
| 304.82          | 0.0020              | HOMO → LUMO+2   | 77.28 |
|                 |                     | HOMO-3 → LUMO+2 | 8.48  |
|                 |                     | HOMO-1 → LUMO+2 | 7.46  |
| 285.56          | 0.0038              | HOMO-1 → LUMO+2 | 60.53 |
|                 |                     | HOMO → LUMO+3   | 22.26 |
| 278.14          | 0.0054              | HOMO-1 → LUMO+3 | 36.92 |
|                 |                     | HOMO-2 → LUMO+4 | 24.66 |
|                 |                     | HOMO → LUMO+3   | 19.40 |
| 271.00          | 0.0343              | HOMO → LUMO+3   | 44.10 |
|                 |                     | HOMO-2 → LUMO+2 | 20.64 |
|                 |                     | HOMO-1 → LUMO+2 | 16.35 |
| 268.07          | 0.0066              | HOMO-1 → LUMO+1 | 91.23 |
| 262.32          | 0.0009              | HOMO-4 → LUMO   | 97.85 |
| 261.63          | 0.0323              | HOMO-2 → LUMO+5 | 37.72 |
|                 |                     | HOMO-1 → LUMO+3 | 23.59 |
|                 |                     | HOMO-2 → LUMO+2 | 7.93  |
|                 |                     | HOMO-2 → LUMO+1 | 6.09  |
|                 |                     | HOMO-2 → LUMO+4 | 5.79  |
| 257.06          | 0.0448              | HOMO-5 → LUMO   | 45.66 |
|                 |                     | HOMO-2 → LUMO+1 | 21.70 |
|                 |                     | HOMO-3 → LUMO+1 | 17.42 |
| 255.59          | 0.0345              | HOMO-2 → LUMO+5 | 32.40 |
|                 |                     | HOMO-2 → LUMO+2 | 23.73 |
|                 |                     | HOMO-1 → LUMO+3 | 12.65 |
| 253.76          | 0.0191              | HOMO-2 → LUMO+1 | 52.59 |
|                 |                     | HOMO-5 → LUMO   | 22.78 |
|                 |                     | HOMO-2 → LUMO+5 | 9.23  |
|                 |                     | HOMO-6 → LUMO   | 8.85  |
| 252.68          | 0.0078              | HOMO-3 → LUMO+2 | 44.12 |
|                 |                     | HOMO → LUMO+4   | 27.06 |
|                 |                     | HOMO → LUMO+2   | 8.64  |
|                 |                     | HOMO-3 → LUMO+1 | 5.38  |
| 251.65          | 0.0444              | HOMO-6 → LUMO   | 34.96 |
|                 |                     | HOMO-3 → LUMO+1 | 28.17 |
|                 |                     | HOMO → LUMO+4   | 11.35 |
|                 |                     | HOMO-2 → LUMO+1 | 10.69 |
|                 |                     | HOMO-5 → LUMO   | 5.60  |
| 248.14          | 0.0147              | HOMO → LUMO+4   | 49.41 |
|                 |                     | HOMO-3 → LUMO+2 | 31.14 |

|        |        |                  |       |
|--------|--------|------------------|-------|
| 239.82 | 0.1942 | HOMO-3 → LUMO+1  | 28.64 |
|        |        | HOMO-6 → LUMO    | 26.10 |
|        |        | HOMO → LUMO+5    | 19.32 |
|        |        | HOMO-5 → LUMO    | 6.75  |
|        |        | HOMO-3 → LUMO+3  | 5.96  |
| 237.07 | 0.0328 | HOMO-3 → LUMO+3  | 47.76 |
|        |        | HOMO-1 → LUMO+4  | 15.13 |
|        |        | HOMO → LUMO+6    | 6.81  |
| 236.43 | 0.0601 | HOMO → LUMO+6    | 37.10 |
|        |        | HOMO-1 → LUMO+4  | 30.71 |
|        |        | HOMO-3 → LUMO+6  | 7.07  |
| 233.47 | 0.1179 | HOMO → LUMO+5    | 18.16 |
|        |        | HOMO-1 → LUMO+4  | 17.00 |
|        |        | HOMO-2 → LUMO+4  | 15.35 |
|        |        | HOMO-3 → LUMO+3  | 7.17  |
|        |        | HOMO-2 → LUMO+6  | 5.85  |
| 230.03 | 0.2734 | HOMO → LUMO+5    | 43.84 |
|        |        | HOMO → LUMO+6    | 15.92 |
|        |        | HOMO-2 → LUMO+4  | 5.96  |
|        |        | HOMO-3 → LUMO+1  | 5.91  |
| 228.14 | 0.0250 | HOMO-7 → LUMO    | 79.00 |
| 226.27 | 0.0368 | HOMO-2 → LUMO+4  | 34.81 |
|        |        | HOMO-7 → LUMO    | 12.42 |
|        |        | HOMO-2 → LUMO+6  | 11.36 |
|        |        | HOMO-2 → LUMO+7  | 5.35  |
| 220.69 | 0.0294 | HOMO → LUMO+7    | 30.09 |
|        |        | HOMO → LUMO+8    | 23.62 |
|        |        | HOMO → LUMO+10   | 6.13  |
| 219.14 | 0.0087 | HOMO → LUMO+8    | 56.74 |
|        |        | HOMO → LUMO+7    | 13.53 |
|        |        | HOMO-3 → LUMO+4  | 6.18  |
| 218.39 | 0.0379 | HOMO-1 → LUMO+6  | 15.17 |
|        |        | HOMO → LUMO+7    | 10.77 |
|        |        | HOMO-1 → LUMO+5  | 7.56  |
|        |        | HOMO → LUMO+10   | 6.88  |
|        |        | HOMO-1 → LUMO+7  | 6.67  |
|        |        | HOMO-2 → LUMO+5  | 6.27  |
| 216.40 | 0.0181 | HOMO → LUMO+8    | 6.11  |
|        |        | HOMO-2 → LUMO+5  | 23.65 |
|        |        | HOMO-1 → LUMO+6  | 7.19  |
|        |        | HOMO → LUMO+10   | 6.73  |
|        |        | HOMO → LUMO+11   | 6.34  |
|        |        | HOMO-2 → LUMO+11 | 6.28  |
|        |        | HOMO-2 → LUMO+6  | 5.66  |
|        |        | HOMO-2 → LUMO+4  | 5.52  |
| 214.93 | 0.0618 | HOMO-3 → LUMO+5  | 5.45  |
|        |        | HOMO-3 → LUMO+4  | 23.18 |
|        |        | HOMO-1 → LUMO+7  | 12.24 |
|        |        | HOMO → LUMO+11   | 8.31  |

|        |        |                  |       |
|--------|--------|------------------|-------|
|        |        | HOMO-1 → LUMO+4  | 7.12  |
|        |        | HOMO-1 → LUMO+5  | 7.08  |
|        |        | HOMO-1 → LUMO+10 | 5.38  |
| 214.08 | 0.0405 | HOMO-1 → LUMO+5  | 46.94 |
|        |        | HOMO-3 → LUMO+4  | 13.63 |
|        |        | HOMO-1 → LUMO+10 | 6.10  |
|        |        | HOMO → LUMO+10   | 5.89  |
| 212.04 | 0.0219 | HOMO-8 → LUMO    | 63.69 |
|        |        | HOMO-6 → LUMO+1  | 7.03  |
|        |        | HOMO-1 → LUMO+7  | 6.01  |
| 211.78 | 0.0084 | HOMO-1 → LUMO+7  | 34.21 |
|        |        | HOMO-1 → LUMO+10 | 10.98 |
|        |        | HOMO-8 → LUMO    | 10.40 |
|        |        | HOMO-4 → LUMO+1  | 6.34  |
| 211.35 | 0.0007 | HOMO-4 → LUMO+1  | 88.18 |
|        |        | HOMO-8 → LUMO    | 5.87  |
| 210.43 | 0.0128 | HOMO-3 → LUMO+4  | 31.89 |
|        |        | HOMO → LUMO+7    | 12.66 |
|        |        | HOMO → LUMO+9    | 10.90 |
|        |        | HOMO → LUMO+11   | 9.48  |
| 209.02 | 0.0030 | HOMO-11 → LUMO   | 91.96 |
| 208.08 | 0.0043 | HOMO-1 → LUMO+10 | 25.69 |
|        |        | HOMO → LUMO+10   | 9.47  |
|        |        | HOMO-2 → LUMO+7  | 8.44  |
|        |        | HOMO-2 → LUMO+5  | 7.17  |
|        |        | HOMO-2 → LUMO+10 | 5.97  |
| 206.35 | 0.0025 | HOMO-9 → LUMO    | 92.24 |
| 206.25 | 0.0437 | HOMO-5 → LUMO+1  | 60.63 |
|        |        | HOMO-4 → LUMO+2  | 12.61 |
|        |        | HOMO-6 → LUMO+1  | 5.46  |
| 206.12 | 0.0080 | HOMO-4 → LUMO+2  | 71.27 |
|        |        | HOMO-5 → LUMO+1  | 10.22 |
| 205.43 | 0.0087 | HOMO → LUMO+9    | 54.78 |
|        |        | HOMO-1 → LUMO+10 | 7.50  |
|        |        | HOMO-4 → LUMO+2  | 6.41  |
| 204.12 | 0.0391 | HOMO-5 → LUMO+2  | 38.77 |
|        |        | HOMO-6 → LUMO+2  | 16.16 |
|        |        | HOMO-10 → LUMO   | 13.17 |
|        |        | HOMO-6 → LUMO+1  | 9.11  |
|        |        | HOMO → LUMO+9    | 5.36  |
| 203.36 | 0.0096 | HOMO-5 → LUMO+2  | 12.98 |
|        |        | HOMO-3 → LUMO+6  | 12.15 |
|        |        | HOMO-6 → LUMO+1  | 10.96 |
|        |        | HOMO-1 → LUMO+6  | 9.38  |
|        |        | HOMO-1 → LUMO+10 | 8.89  |
|        |        | HOMO → LUMO+9    | 6.77  |
|        |        | HOMO-10 → LUMO   | 5.61  |
|        |        | HOMO-6 → LUMO+2  | 5.11  |
| 203.12 | 0.0645 | HOMO-6 → LUMO+1  | 24.33 |

|        |        |                  |       |
|--------|--------|------------------|-------|
|        |        | HOMO-10 → LUMO   | 15.61 |
|        |        | HOMO-3 → LUMO+6  | 9.11  |
|        |        | HOMO-3 → LUMO+5  | 6.85  |
| 202.00 | 0.0010 | HOMO-2 → LUMO+7  | 33.18 |
|        |        | HOMO-2 → LUMO+5  | 15.83 |
|        |        | HOMO-2 → LUMO+6  | 7.71  |
| 200.49 | 0.0406 | HOMO-3 → LUMO+5  | 15.47 |
|        |        | HOMO → LUMO+10   | 14.92 |
|        |        | HOMO-1 → LUMO+11 | 11.92 |
|        |        | HOMO-1 → LUMO+5  | 7.76  |
|        |        | HOMO-1 → LUMO+6  | 7.12  |
|        |        | HOMO-3 → LUMO+6  | 6.95  |
|        |        | HOMO-2 → LUMO+10 | 6.39  |

**Table S30.** Calculated transitions (with a contribution greater than 5%) for [Re(CO)<sub>3</sub>(ClQ)HPhpz] (**12**)

| Wavelength [nm] | Oscillator strength | Main components | %     |
|-----------------|---------------------|-----------------|-------|
| 421.72          | 0.1080              | HOMO → LUMO     | 97.14 |
| 356.27          | 0.0583              | HOMO-1 → LUMO   | 94.35 |
| 339.27          | 0.0012              | HOMO-2 → LUMO   | 97.69 |
| 322.56          | 0.0023              | HOMO-3 → LUMO   | 93.13 |
| 318.15          | 0.0094              | HOMO → LUMO+1   | 88.28 |
| 310.29          | 0.0341              | HOMO → LUMO+2   | 82.34 |
|                 |                     | HOMO-6 → LUMO   | 11.91 |
| 302.18          | 0.0029              | HOMO → LUMO+3   | 69.85 |
|                 |                     | HOMO-1 → LUMO+3 | 10.05 |
| 285.60          | 0.1914              | HOMO-1 → LUMO+1 | 43.72 |
|                 |                     | HOMO-1 → LUMO+3 | 24.24 |
|                 |                     | HOMO → LUMO+5   | 9.90  |
|                 |                     | HOMO → LUMO+3   | 5.64  |
|                 |                     | HOMO-3 → LUMO+5 | 5.36  |
| 283.92          | 0.0728              | HOMO-1 → LUMO+3 | 39.26 |
|                 |                     | HOMO-1 → LUMO+1 | 28.10 |
|                 |                     | HOMO-1 → LUMO+5 | 8.77  |
|                 |                     | HOMO-2 → LUMO+3 | 8.77  |
| 276.50          | 0.0589              | HOMO-4 → LUMO   | 74.79 |
|                 |                     | HOMO-1 → LUMO+1 | 8.01  |
|                 |                     | HOMO-2 → LUMO+3 | 6.46  |
| 274.25          | 0.1159              | HOMO-2 → LUMO+3 | 21.08 |
|                 |                     | HOMO → LUMO+5   | 17.96 |
|                 |                     | HOMO-1 → LUMO+5 | 15.01 |
|                 |                     | HOMO-4 → LUMO   | 14.83 |
|                 |                     | HOMO-1 → LUMO+1 | 13.09 |
|                 |                     | HOMO-3 → LUMO+5 | 6.91  |
| 270.23          | 0.0154              | HOMO → LUMO+5   | 31.79 |
|                 |                     | HOMO-2 → LUMO+1 | 17.88 |
|                 |                     | HOMO-2 → LUMO+3 | 16.10 |
|                 |                     | HOMO-1 → LUMO+3 | 7.82  |
|                 |                     | HOMO → LUMO+3   | 7.29  |
| 268.32          | 0.0029              | HOMO-2 → LUMO+1 | 42.08 |
|                 |                     | HOMO-1 → LUMO+2 | 32.21 |
|                 |                     | HOMO-2 → LUMO+5 | 13.88 |
|                 |                     | HOMO-2 → LUMO+3 | 6.52  |
| 267.95          | 0.0076              | HOMO-1 → LUMO+2 | 55.74 |
|                 |                     | HOMO-2 → LUMO+1 | 20.33 |
|                 |                     | HOMO-2 → LUMO+5 | 5.23  |
|                 |                     | HOMO → LUMO+5   | 5.07  |
| 260.47          | 0.0282              | HOMO-1 → LUMO+5 | 29.63 |
|                 |                     | HOMO-2 → LUMO+5 | 19.08 |
|                 |                     | HOMO → LUMO+5   | 12.13 |
|                 |                     | HOMO-3 → LUMO+1 | 6.57  |
|                 |                     | HOMO-2 → LUMO+3 | 6.24  |
| 257.60          | 0.0096              | HOMO-3 → LUMO+1 | 40.96 |

|        |        |                 |       |
|--------|--------|-----------------|-------|
|        |        | HOMO → LUMO+4   | 24.97 |
|        |        | HOMO-3 → LUMO+2 | 5.83  |
| 256.93 | 0.0259 | HOMO → LUMO+4   | 59.80 |
|        |        | HOMO-3 → LUMO+1 | 23.34 |
| 254.92 | 0.0499 | HOMO-2 → LUMO+2 | 33.92 |
|        |        | HOMO-3 → LUMO+2 | 23.82 |
|        |        | HOMO-6 → LUMO   | 20.09 |
|        |        | HOMO → LUMO+4   | 8.43  |
| 252.48 | 0.0440 | HOMO-2 → LUMO+2 | 54.31 |
|        |        | HOMO-3 → LUMO+2 | 20.72 |
|        |        | HOMO-6 → LUMO   | 9.20  |
| 249.77 | 0.0371 | HOMO-3 → LUMO+3 | 32.24 |
|        |        | HOMO-2 → LUMO+5 | 19.38 |
|        |        | HOMO-1 → LUMO+5 | 8.25  |
|        |        | HOMO-3 → LUMO+1 | 7.87  |
| 248.25 | 0.0201 | HOMO-3 → LUMO+3 | 28.67 |
|        |        | HOMO-2 → LUMO+5 | 22.68 |
|        |        | HOMO-2 → LUMO+3 | 7.60  |
| 247.91 | 0.0028 | HOMO-1 → LUMO+4 | 39.81 |
|        |        | HOMO-5 → LUMO+1 | 30.75 |
|        |        | HOMO-4 → LUMO+4 | 10.66 |
| 245.90 | 0.0003 | HOMO-5 → LUMO   | 95.49 |
| 239.55 | 0.2215 | HOMO-6 → LUMO   | 34.17 |
|        |        | HOMO-3 → LUMO+2 | 33.93 |
|        |        | HOMO → LUMO+7   | 14.87 |
| 238.37 | 0.0241 | HOMO → LUMO+6   | 25.76 |
|        |        | HOMO → LUMO+7   | 18.04 |
|        |        | HOMO-4 → LUMO+1 | 17.38 |
|        |        | HOMO → LUMO+8   | 13.38 |
| 236.46 | 0.0076 | HOMO-7 → LUMO   | 93.16 |
| 235.10 | 0.1301 | HOMO-4 → LUMO+1 | 51.29 |
|        |        | HOMO → LUMO+6   | 18.55 |
|        |        | HOMO-3 → LUMO+5 | 11.84 |
| 233.40 | 0.0803 | HOMO-3 → LUMO+4 | 42.61 |
|        |        | HOMO-4 → LUMO+1 | 20.07 |
|        |        | HOMO → LUMO+8   | 11.82 |
|        |        | HOMO → LUMO+5   | 5.24  |
| 232.04 | 0.1526 | HOMO → LUMO+6   | 37.75 |
|        |        | HOMO → LUMO+7   | 18.98 |
|        |        | HOMO-3 → LUMO+4 | 7.09  |
| 228.77 | 0.2216 | HOMO → LUMO+8   | 33.51 |
|        |        | HOMO → LUMO+7   | 24.00 |
|        |        | HOMO → LUMO+9   | 5.10  |
| 227.33 | 0.0083 | HOMO-8 → LUMO   | 57.33 |
|        |        | HOMO-9 → LUMO   | 28.66 |
| 226.36 | 0.0495 | HOMO-1 → LUMO+4 | 40.35 |
|        |        | HOMO-5 → LUMO   | 25.47 |
|        |        | HOMO-4 → LUMO+4 | 6.64  |
| 223.26 | 0.0132 | HOMO → LUMO+6   | 25.49 |



|        |        |                  |       |
|--------|--------|------------------|-------|
|        |        | HOMO → LUMO+9    | 15.62 |
|        |        | HOMO-2 → LUMO+7  | 9.05  |
|        |        | HOMO-1 → LUMO+8  | 8.36  |
|        |        | HOMO-1 → LUMO+4  | 7.08  |
|        |        | HOMO-2 → LUMO+8  | 6.61  |
| 221.07 | 0.0089 | HOMO-4 → LUMO+2  | 90.05 |
| 220.73 | 0.0210 | HOMO → LUMO+9    | 36.91 |
|        |        | HOMO-2 → LUMO+8  | 10.02 |
|        |        | HOMO → LUMO+10   | 7.11  |
|        |        | HOMO-2 → LUMO+9  | 6.11  |
| 219.74 | 0.0238 | HOMO → LUMO+10   | 17.61 |
|        |        | HOMO-1 → LUMO+7  | 14.11 |
|        |        | HOMO-2 → LUMO+4  | 12.66 |
|        |        | HOMO-1 → LUMO+8  | 8.21  |
|        |        | HOMO → LUMO+12   | 6.03  |
|        |        | HOMO-2 → LUMO+6  | 5.82  |
|        |        | HOMO-3 → LUMO+12 | 5.16  |
| 218.57 | 0.0012 | HOMO-2 → LUMO+4  | 75.48 |
| 218.15 | 0.0114 | HOMO → LUMO+10   | 54.43 |
|        |        | HOMO → LUMO+12   | 12.85 |
|        |        | HOMO-1 → LUMO+7  | 5.27  |
| 216.45 | 0.0141 | HOMO-4 → LUMO+3  | 35.32 |
|        |        | HOMO-2 → LUMO+7  | 15.70 |
|        |        | HOMO-2 → LUMO+9  | 6.05  |
|        |        | HOMO-2 → LUMO+13 | 5.54  |
| 215.16 | 0.0193 | HOMO-4 → LUMO+3  | 24.16 |
|        |        | HOMO-1 → LUMO+6  | 10.14 |
|        |        | HOMO-2 → LUMO+6  | 8.78  |
|        |        | HOMO → LUMO+9    | 7.53  |
|        |        | HOMO-2 → LUMO+13 | 6.20  |
|        |        | HOMO-2 → LUMO+7  | 5.12  |
| 214.84 | 0.0205 | HOMO-4 → LUMO+3  | 21.09 |
|        |        | HOMO-1 → LUMO+7  | 19.70 |
|        |        | HOMO-1 → LUMO+9  | 7.92  |
|        |        | HOMO-1 → LUMO+8  | 7.48  |
|        |        | HOMO-1 → LUMO+12 | 5.31  |
| 212.87 | 0.0218 | HOMO-3 → LUMO+4  | 54.61 |
|        |        | HOMO-9 → LUMO    | 8.92  |
|        |        | HOMO-13 → LUMO   | 5.14  |
| 212.70 | 0.0044 | HOMO-9 → LUMO    | 21.44 |
|        |        | HOMO-3 → LUMO+4  | 21.40 |
|        |        | HOMO-13 → LUMO   | 9.79  |
|        |        | HOMO-7 → LUMO+1  | 8.09  |
|        |        | HOMO-8 → LUMO    | 6.46  |
| 212.04 | 0.0017 | HOMO-7 → LUMO+1  | 25.11 |
|        |        | HOMO-1 → LUMO+9  | 13.37 |
|        |        | HOMO-13 → LUMO   | 9.04  |
|        |        | HOMO-9 → LUMO    | 7.77  |
|        |        | HOMO-1 → LUMO+12 | 5.33  |

|        |        |                  |       |
|--------|--------|------------------|-------|
| 211.25 | 0.0288 | HOMO-1 → LUMO+7  | 14.12 |
|        |        | HOMO-2 → LUMO+6  | 13.84 |
|        |        | HOMO → LUMO+13   | 10.12 |
|        |        | HOMO-13 → LUMO   | 7.08  |
|        |        | HOMO-3 → LUMO+4  | 6.18  |
|        |        | HOMO-2 → LUMO+12 | 5.42  |
|        |        | HOMO-1 → LUMO+6  | 5.38  |
| 211.07 | 0.0075 | HOMO-10 → LUMO   | 60.68 |
|        |        | HOMO-13 → LUMO   | 18.24 |
|        |        | HOMO-9 → LUMO    | 5.52  |
| 210.78 | 0.0139 | HOMO-6 → LUMO+1  | 11.63 |
|        |        | HOMO → LUMO+9    | 11.27 |
|        |        | HOMO-2 → LUMO+8  | 10.08 |
|        |        | HOMO-2 → LUMO+9  | 9.78  |
|        |        | HOMO-2 → LUMO+12 | 7.10  |
|        |        | HOMO-2 → LUMO+6  | 5.58  |
|        |        | HOMO-1 → LUMO+9  | 5.11  |
| 210.36 | 0.0033 | HOMO-6 → LUMO+1  | 78.91 |
| 207.76 | 0.0012 | HOMO-1 → LUMO+12 | 19.31 |
|        |        | HOMO-2 → LUMO+6  | 12.46 |
|        |        | HOMO-1 → LUMO+9  | 7.35  |
|        |        | HOMO-3 → LUMO+7  | 5.17  |
| 206.66 | 0.0722 | HOMO-7 → LUMO+1  | 31.53 |
|        |        | HOMO-1 → LUMO+6  | 12.29 |
|        |        | HOMO → LUMO+12   | 7.54  |
|        |        | HOMO-3 → LUMO+8  | 7.43  |
|        |        | HOMO-3 → LUMO+7  | 5.98  |
|        |        | HOMO → LUMO+8    | 5.10  |
| 206.56 | 0.0001 | HOMO-11 → LUMO   | 96.45 |
| 205.03 | 0.0241 | HOMO-12 → LUMO   | 19.78 |
|        |        | HOMO-13 → LUMO   | 17.85 |
|        |        | HOMO-6 → LUMO+2  | 17.77 |
|        |        | HOMO-10 → LUMO   | 13.28 |
|        |        | HOMO-8 → LUMO    | 6.87  |
|        |        | HOMO-4 → LUMO+5  | 5.75  |
| 204.84 | 0.0045 | HOMO-4 → LUMO+5  | 41.66 |
|        |        | HOMO-3 → LUMO+8  | 6.91  |
|        |        | HOMO-3 → LUMO+6  | 6.34  |
| 204.31 | 0.0079 | HOMO → LUMO+11   | 70.13 |
| 202.37 | 0.0220 | HOMO-1 → LUMO+12 | 20.30 |
|        |        | HOMO-1 → LUMO+8  | 19.12 |
|        |        | HOMO-5 → LUMO+2  | 7.46  |
|        |        | HOMO-1 → LUMO+7  | 6.27  |
|        |        | HOMO-1 → LUMO+9  | 5.66  |
|        |        | HOMO-4 → LUMO+5  | 5.14  |
| 202.30 | 0.0334 | HOMO-5 → LUMO+2  | 83.58 |
| 200.86 | 0.0305 | HOMO-3 → LUMO+7  | 11.84 |
|        |        | HOMO-13 → LUMO   | 10.75 |
|        |        | HOMO-4 → LUMO+4  | 10.66 |

|        |        |                  |       |
|--------|--------|------------------|-------|
|        |        | HOMO-6 → LUMO+2  | 9.31  |
|        |        | HOMO-3 → LUMO+6  | 6.35  |
|        |        | HOMO-9 → LUMO    | 5.69  |
|        |        | HOMO-1 → LUMO+13 | 5.68  |
|        |        | HOMO-8 → LUMO    | 5.11  |
| 200.36 | 0.0869 | HOMO-4 → LUMO+4  | 36.64 |
|        |        | HOMO-5 → LUMO+1  | 9.73  |
|        |        | HOMO → LUMO+12   | 7.63  |
|        |        | HOMO-3 → LUMO+6  | 5.58  |
|        |        | HOMO-3 → LUMO+7  | 5.56  |

**Table S31.** DFT (PBE0/def2-TZVP/ECP(Re)/IEFPCM(methanol)) calculated compositions of the highest occupied and lowest unoccupied molecular orbitals of studied tricarbonyl rhenium(I) complexes, divided for composing fragments ( $L_B$  and  $L_M$  – bidentate and monodentate ligand, respectively).

| <b>Complex</b> | <b>MO</b> | <b>Re</b> | <b>CO</b> | <b><math>L_B</math></b> | <b><math>L_M</math></b> |
|----------------|-----------|-----------|-----------|-------------------------|-------------------------|
| <b>2</b>       | LUMO      | 3         | 3         | 93                      | 1                       |
|                | HOMO      | 13        | 9         | 77                      | 1                       |
|                | HOMO-1    | 56        | 30        | 7                       | 7                       |
|                | HOMO-2    | 58        | 31        | 10                      | 1                       |
| <b>3</b>       | LUMO      | 3         | 3         | 93                      | 1                       |
|                | HOMO      | 13        | 9         | 76                      | 2                       |
|                | HOMO-1    | 50        | 26        | 6                       | 18                      |
|                | HOMO-2    | 60        | 32        | 7                       | 1                       |
| <b>5</b>       | LUMO      | 5         | 3         | 92                      | 0                       |
|                | HOMO      | 12        | 9         | 78                      | 1                       |
|                | HOMO-1    | 57        | 30        | 6                       | 7                       |
|                | HOMO-2    | 59        | 31        | 9                       | 1                       |
| <b>6</b>       | LUMO      | 5         | 2         | 93                      | 0                       |
|                | HOMO      | 12        | 9         | 78                      | 1                       |
|                | HOMO-1    | 49        | 27        | 10                      | 14                      |
|                | HOMO-2    | 60        | 32        | 8                       | 0                       |
| <b>7</b>       | LUMO      | 5         | 2         | 93                      | 0                       |
|                | HOMO      | 12        | 9         | 78                      | 1                       |
|                | HOMO-1    | 50        | 26        | 5                       | 19                      |
|                | HOMO-2    | 62        | 31        | 6                       | 1                       |
| <b>8</b>       | LUMO      | 5         | 2         | 85                      | 8                       |
|                | HOMO      | 12        | 9         | 77                      | 2                       |
|                | HOMO-1    | 43        | 23        | 4                       | 30                      |
|                | HOMO-2    | 61        | 32        | 6                       | 1                       |
| <b>9</b>       | LUMO      | 3         | 3         | 93                      | 1                       |
|                | HOMO      | 11        | 8         | 80                      | 1                       |
|                | HOMO-1    | 57        | 30        | 6                       | 7                       |
|                | HOMO-2    | 58        | 32        | 9                       | 1                       |
| <b>10</b>      | LUMO      | 3         | 3         | 93                      | 1                       |
|                | HOMO      | 12        | 8         | 79                      | 1                       |
|                | HOMO-1    | 57        | 29        | 7                       | 7                       |
|                | HOMO-2    | 57        | 31        | 10                      | 2                       |
| <b>11</b>      | LUMO      | 3         | 2         | 94                      | 1                       |
|                | HOMO      | 12        | 8         | 79                      | 1                       |
|                | HOMO-1    | 50        | 25        | 6                       | 19                      |
|                | HOMO-2    | 60        | 32        | 7                       | 1                       |
| <b>12</b>      | LUMO      | 2         | 3         | 94                      | 1                       |
|                | HOMO      | 12        | 8         | 79                      | 1                       |
|                | HOMO-1    | 42        | 21        | 6                       | 31                      |
|                | HOMO-2    | 60        | 32        | 7                       | 1                       |

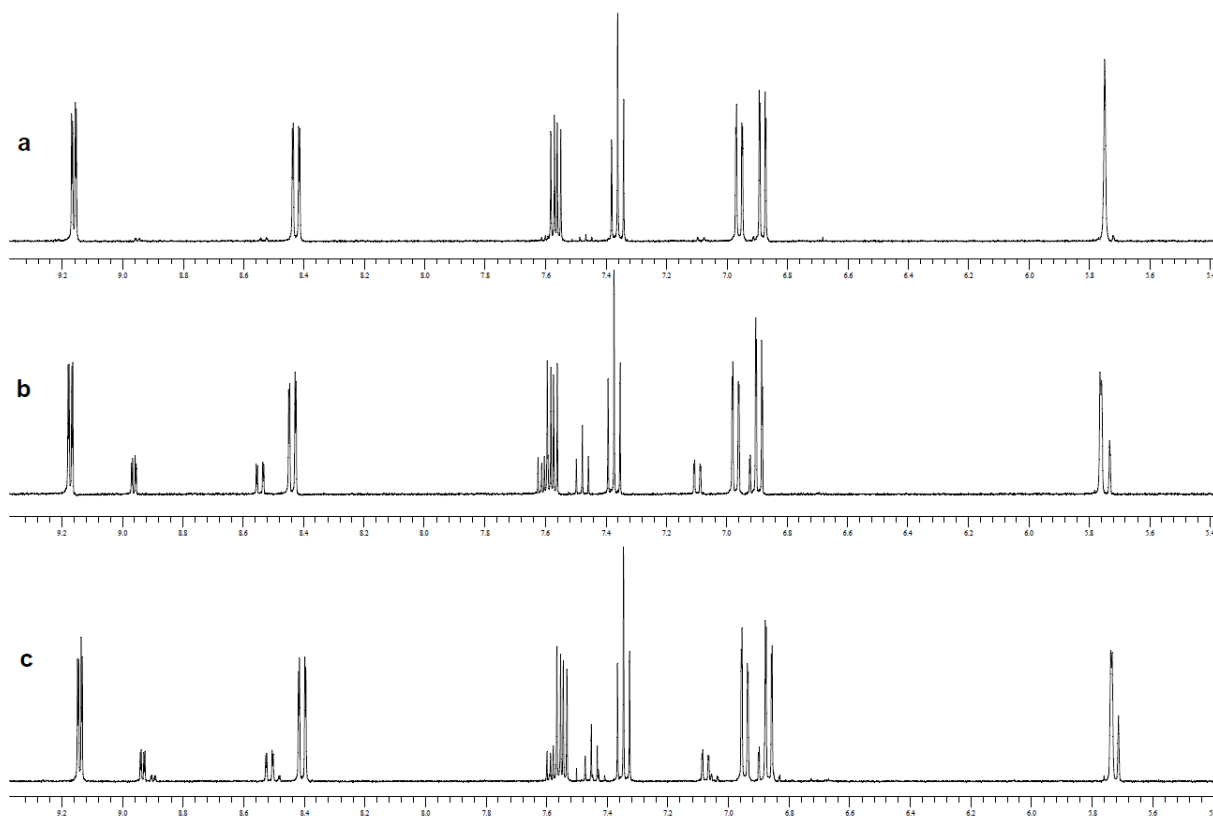

**Fig. S34.** Exchange of pyrazole ligand with DMSO and H<sub>2</sub>O. <sup>1</sup>H NMR spectra of complex **3** (6 mg) in DMSO-d<sub>6</sub> (250 μL): a) 5 min. after dissolution in DMSO, b) 40 hrs after dissolution in DMSO, c) 1 week after addition of H<sub>2</sub>O.

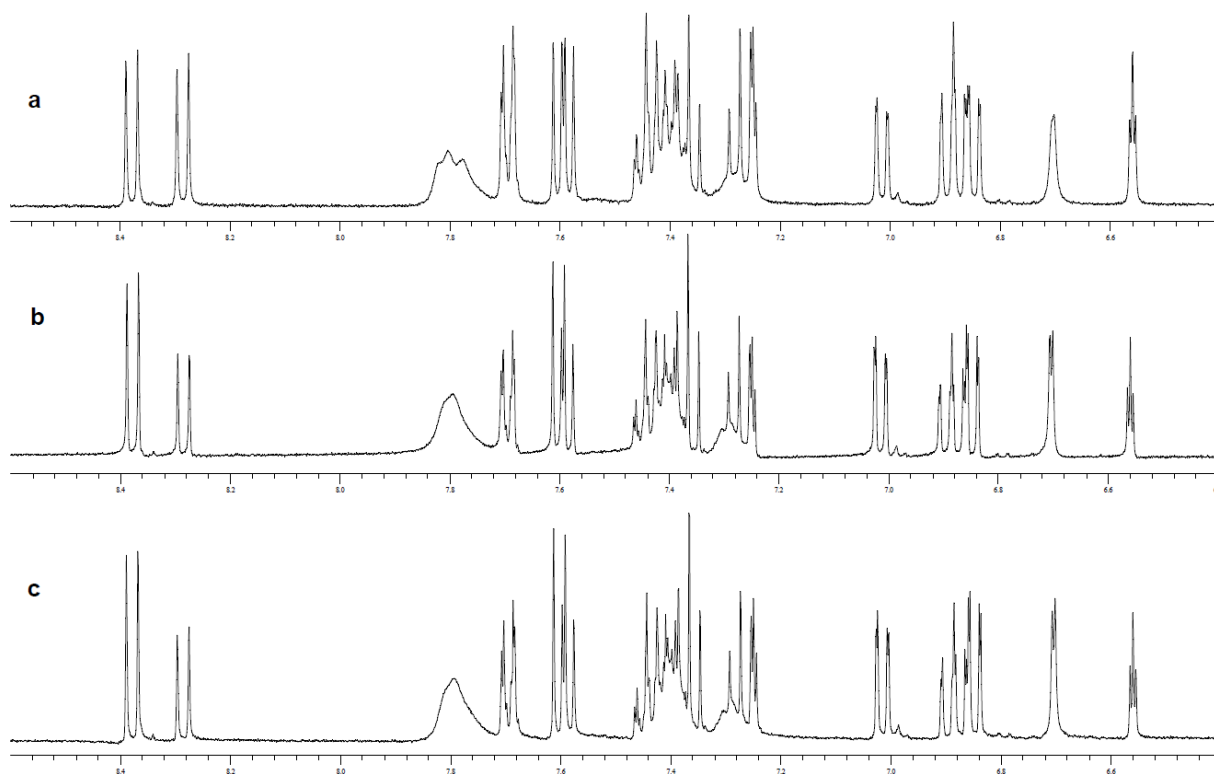

**Fig. S35.** Exchange of phenylpyrazole ligand with DMSO.  $^1\text{H}$  NMR spectra of complex **8** (6 mg) in  $\text{DMSO-d}_6$  (250  $\mu\text{L}$ ): a) 5 min. b) 5 hrs c) 24 hrs after dissolution in DMSO.

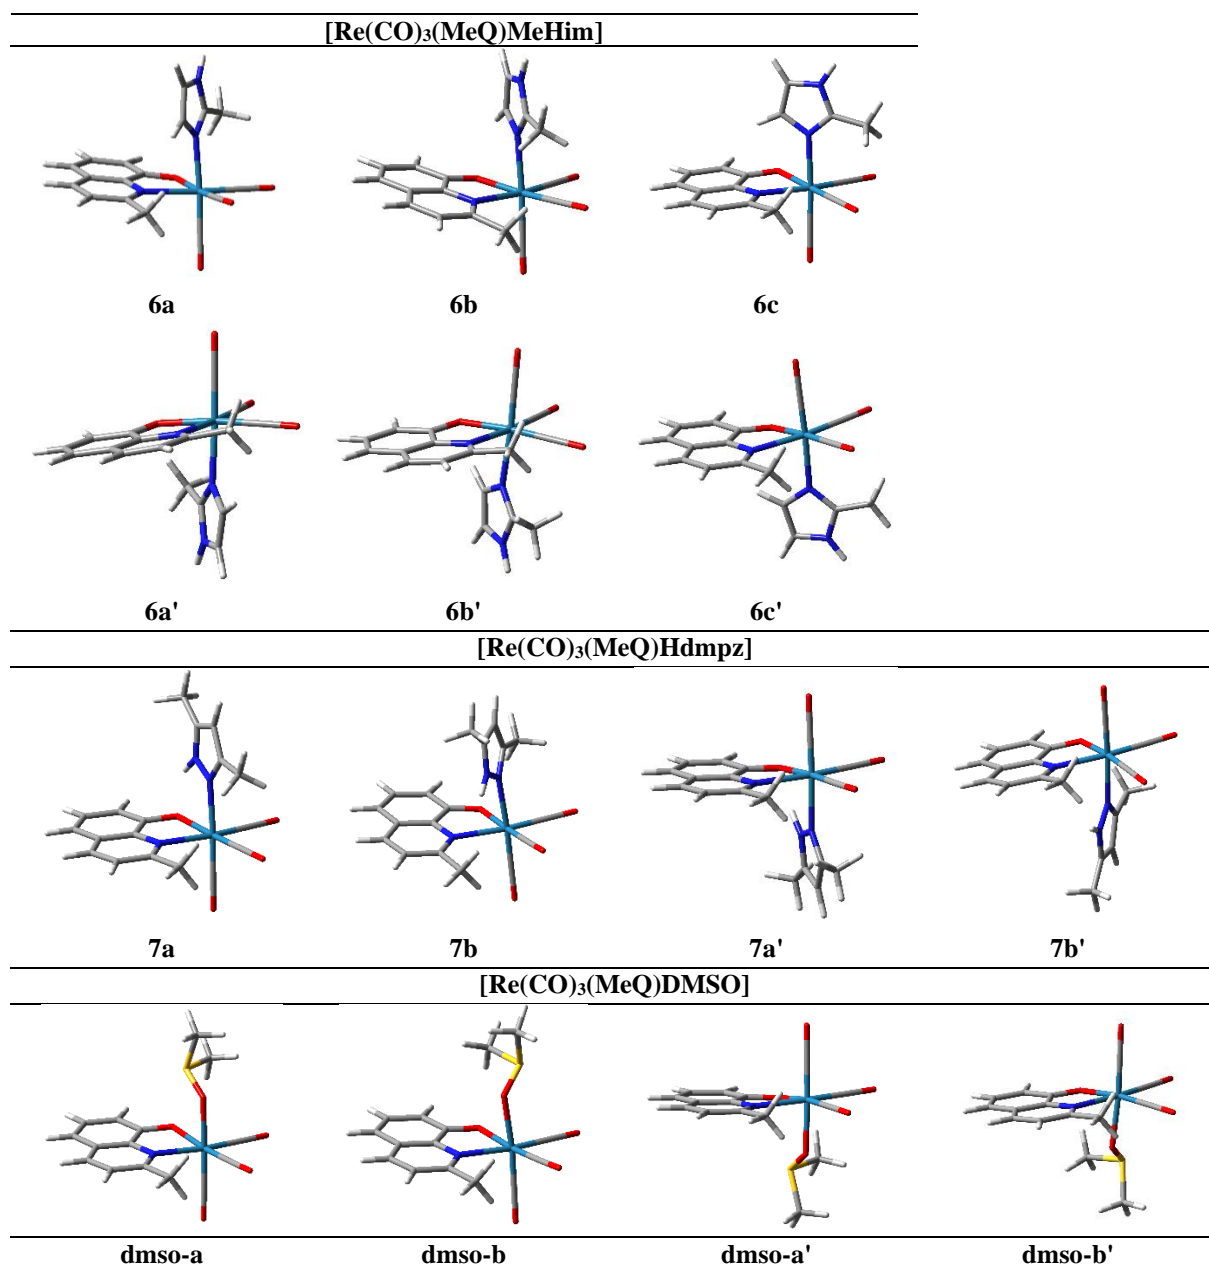

**Fig. S36.** Structures of tricarbonyl rhenium(I) complexes with 2-methyl-8-hydroxyquinolinato ligand (MeQ<sup>-</sup>) and 2-methylimidazole (MeHim), or 3,5-dimethylpyrazole (Hdmpz), or DMSO calculated at the B3LYP/aug-cc-pVTZ(N,O,S,C,H)/def2TZVP(Re) level. The structures denoted by *prime* are isoenergetic with their *no prime* counterparts (see Table S32).

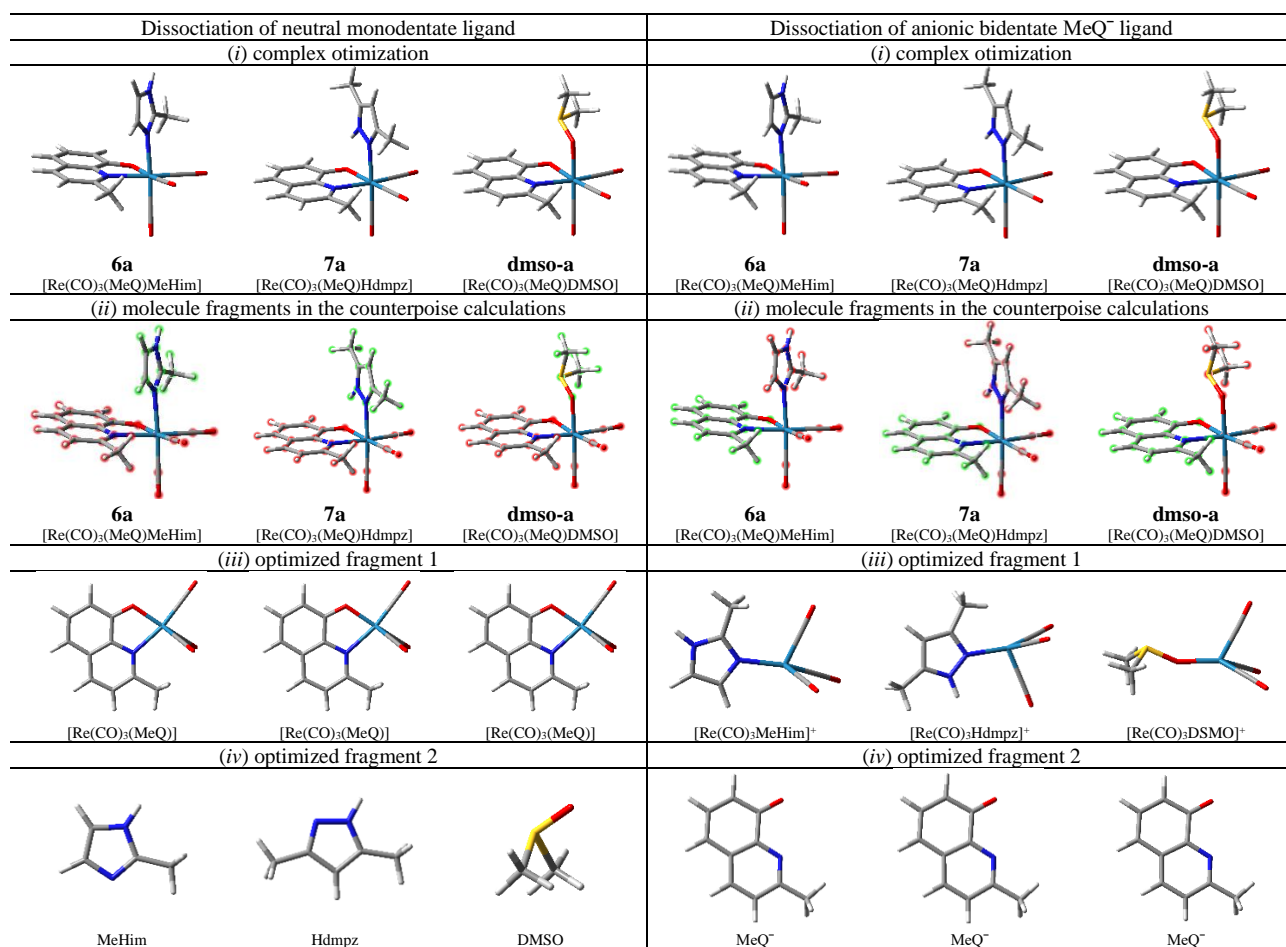

**Fig. S37.** Scheme of the calculation of interaction energies corrected for BSSE (by the Boys–Bernardi counterpoise, CP, method) and deformation of monomers upon complexation: *(i)* optimization of the complex; *(ii)* division of the complex on the appropriate fragments and Counterpoise=2 calculations. The complex fragments 1 and 2 in the CP calculations are highlighted in red and green, respectively. *(iii)* optimization of appropriate fragments 1 and *(iv)* 2. This scheme is shown for the most stable tricarbonyl rhenium(I) complexes with 2-methyl-8-hydroxyquinolinato (MeO<sup>-</sup>) and 2-methylimidazole (MeHim), or 3,5-dimethylpyrazole (Hdmpz), or DMSO obtained at the B3LYP/aug-cc-pVTZ(N,O,S,C,H)/def2TZVP(Re) level. When defining the Counterpoise=2 calculations the charge and multiplicity of which specie (dimer, fragment 1, fragment 2) must be defined. Here, complexes and their appropriate fragments are neutral singlets when MeHim, Hdmpz or DMSO are defined as fragment 2. However, when fragment 2 is anionic MeO<sup>-</sup>, then the whole complex is neutral singlet and fragment 1 is a cation singlet ([Re(CO)<sub>3</sub>MeHim]<sup>+</sup>, [Re(CO)<sub>3</sub>Hdmpz]<sup>+</sup>, or [Re(CO)<sub>3</sub>DMSO]<sup>+</sup>).



**Table S32.** Energies (1-7, a.u.)\* of appropriate complex fragments used for calculation of the seven-point interaction energy ( $\Delta E_7$ ) and its components (kcal/mol) for biding the bidentate ( $\text{MeQ}^-$ ) and monodentate ligands (**Hdmpz**, **dmsO**, or **MeHim**) with the  $\text{Re}(\text{CO})_3$  system: uncorrected interaction energy ( $\Delta E$ ), counterpoise corrected interaction energy ( $\Delta E_{\text{CP}}$ ), basis set superposition error (BSSE), deformation energy ( $\Delta E_{\text{def}}$ ). Structures of the complexes are shown in Fig. S36 and the scheme of counterpoise calculations are shown in Fig. S37. The most stable, isoenegetic structures are highlighted in red. Results obtained at the B3LYP/aug-cc-pVTZ(N,O,S,C,H)/def2TZVP(Re) computational level.

| Dissociation of neutral monodentate ligand              |              |              |              |              |              |             |             |            |                        |      |              |                         |
|---------------------------------------------------------|--------------|--------------|--------------|--------------|--------------|-------------|-------------|------------|------------------------|------|--------------|-------------------------|
|                                                         | 1            | 2            | 3            | 4            | 5            | 6           | 7           | $\Delta E$ | $\Delta E_{\text{CP}}$ | BSSE | $\Delta E_7$ | $\Delta E_{\text{def}}$ |
| 6a                                                      | -1200.348636 | -934.6575062 | -265.640665  | -934.6568579 | -265.640368  | -934.672846 | -265.641630 | -32.26     | -31.67                 | 0.59 | -20.84       | 10.82                   |
| 6b                                                      | -1200.346561 | -934.6570426 | -265.640470  | -934.6563873 | -265.640179  | -934.672846 | -265.641630 | -31.37     | -30.78                 | 0.59 | -19.54       | 11.24                   |
| 6c                                                      | -1200.346362 | -934.6556814 | -265.640393  | -934.6550213 | -265.640113  | -934.672846 | -265.641630 | -32.15     | -31.56                 | 0.59 | -19.42       | 12.14                   |
| 6a'                                                     | -1200.348636 | -934.657513  | -265.640663  | -934.656865  | -265.640366  | -934.672846 | -265.641630 | -32.26     | -31.66                 | 0.59 | -20.84       | 10.82                   |
| 6b'                                                     | -1200.346561 | -934.657040  | -265.640470  | -934.656385  | -265.640179  | -934.672846 | -265.641630 | -31.37     | -30.78                 | 0.59 | -19.54       | 11.24                   |
| 6c'                                                     | -1200.346362 | -934.6556886 | -265.640393  | -934.6550285 | -265.640113  | -934.672846 | -265.641630 | -32.14     | -31.55                 | 0.59 | -19.42       | 12.13                   |
|                                                         |              |              |              |              |              |             |             |            |                        |      |              |                         |
| 7a                                                      | -1239.667211 | -934.656218  | -304.955315  | -934.655521  | -304.954984  | -934.672846 | -304.957250 | -35.58     | -34.94                 | 0.64 | -22.64       | 12.29                   |
| 7b                                                      | -1239.659393 | -934.657496  | -304.956378  | -934.656814  | -304.956057  | -934.672846 | -304.957250 | -29.19     | -28.56                 | 0.63 | -17.75       | 10.81                   |
| 7a'                                                     | -1239.667210 | -934.656226  | -304.955330  | -934.655530  | -304.955000  | -934.672846 | -304.957250 | -35.57     | -34.92                 | 0.64 | -22.65       | 12.28                   |
| 7b'                                                     | -1239.659393 | -934.657503  | -304.956376  | -934.656821  | -304.956054  | -934.672846 | -304.957250 | -29.19     | -28.56                 | 0.63 | -17.75       | 10.81                   |
|                                                         |              |              |              |              |              |             |             |            |                        |      |              |                         |
| dmsO-a                                                  | -1488.004992 | -934.6597432 | -553.3037841 | -934.6593039 | -553.3034085 | -934.672846 | -553.306004 | -26.53     | -26.02                 | 0.51 | -15.89       | 10.13                   |
| dmsO-b                                                  | -1488.004214 | -934.6598253 | -553.3045143 | -934.6594031 | -553.3041906 | -934.672846 | -553.306004 | -25.49     | -25.02                 | 0.47 | -15.45       | 9.57                    |
| dmsO-a'                                                 | -1488.004992 | -934.6597437 | -553.3037872 | -934.6593044 | -553.3034117 | -934.672846 | -553.306004 | -26.53     | -26.02                 | 0.51 | -15.89       | 10.12                   |
| dmsO-b'                                                 | -1488.004214 | -934.6598261 | -553.3045162 | -934.6594039 | -553.3041926 | -934.672846 | -553.306004 | -25.49     | -25.02                 | 0.47 | -15.45       | 9.57                    |
| Dissociation of anionic bidentate $\text{MeQ}^-$ ligand |              |              |              |              |              |             |             |            |                        |      |              |                         |
|                                                         | 1            | 2            | 3            | 4            | 5            | 6           | 7           | $\Delta E$ | $\Delta E_{\text{CP}}$ | BSSE | $\Delta E_7$ | $\Delta E_{\text{def}}$ |
| 6a                                                      | -1200.348636 | -683.9551615 | -516.0904351 | -683.9543529 | -516.0899904 | -683.965563 | -516.09802  | -190.95    | -190.16                | 0.79 | -178.09      | 12.07                   |
| 6b                                                      | -1200.346561 | -683.953981  | -516.0901682 | -683.9531551 | -516.0897302 | -683.965563 | -516.09802  | -190.56    | -189.77                | 0.79 | -176.78      | 12.99                   |
| 6c                                                      | -1200.346362 | -683.9540569 | -516.0905931 | -683.9532513 | -516.0901602 | -683.965563 | -516.09802  | -190.10    | -189.33                | 0.78 | -176.67      | 12.66                   |
| 6a'                                                     | -1200.348636 | -683.9551597 | -516.090435  | -683.9543511 | -516.0899902 | -683.965563 | -516.09802  | -190.95    | -190.16                | 0.79 | -178.09      | 12.07                   |
| 6b'                                                     | -1200.346561 | -683.9539799 | -516.0901664 | -683.953154  | -516.0897284 | -683.965563 | -516.09802  | -190.56    | -189.77                | 0.79 | -176.78      | 12.99                   |
| 6c'                                                     | -1200.346362 | -683.9540497 | -516.0905935 | -683.9532444 | -516.0901606 | -683.965563 | -516.09802  | -190.11    | -189.33                | 0.78 | -176.67      | 12.66                   |
|                                                         |              |              |              |              |              |             |             |            |                        |      |              |                         |
| 7a                                                      | -1239.667211 | -723.2586785 | -516.0891836 | -723.2578211 | -516.0887337 | -723.280169 | -516.09802  | -201.21    | -200.39                | 0.82 | -180.54      | 19.85                   |
| 7b                                                      | -1239.659393 | -723.2641161 | -516.0904338 | -723.2632864 | -516.0899833 | -723.280169 | -516.09802  | -192.10    | -191.29                | 0.80 | -175.65      | 15.64                   |
| 7a'                                                     | -1239.66721  | -723.2587084 | -516.0891744 | -723.2578517 | -516.0887247 | -723.280169 | -516.09802  | -201.20    | -200.38                | 0.82 | -180.54      | 19.84                   |
| 7b'                                                     | -1239.659393 | -723.2641044 | -516.090429  | -723.2632746 | -516.0899786 | -723.280169 | -516.09802  | -192.11    | -191.30                | 0.80 | -175.65      | 15.65                   |
|                                                         |              |              |              |              |              |             |             |            |                        |      |              |                         |
| dmsO-a                                                  | -1488.004992 | -971.6029146 | -516.0894691 | -971.6019794 | -516.0890687 | -971.631027 | -516.09802  | -197.00    | -196.16                | 0.84 | -172.32      | 23.85                   |
| dmsO-b                                                  | -1488.004214 | -971.6064553 | -516.0903204 | -971.6055885 | -516.0899201 | -971.631027 | -516.09802  | -193.72    | -192.92                | 0.80 | -171.87      | 21.05                   |
| dmsO-a'                                                 | -1488.004992 | -971.6029171 | -516.0894789 | -971.6019819 | -516.0890785 | -971.631027 | -516.09802  | -197.00    | -196.16                | 0.84 | -172.32      | 23.84                   |
| dmsO-b'                                                 | -1488.004214 | -971.6064559 | -516.0903204 | -971.6055892 | -516.0899201 | -971.631027 | -516.09802  | -193.72    | -192.92                | 0.80 | -171.87      | 21.05                   |

\*the energies in the 1-7 columns are the following : 1 – energy of optimized complex, 2 – energy of fragment 1 in the geometry and basis set of the complex, 3 – energy of fragment 2 in the geometry and basis set of the complex, 4 – energy of fragment 1 in the geometry of the complex but its basis set, 5 – energy of fragment 2 in the geometry of the complex but its basis set, 6 – energy of optimized fragment 1 in its basis set, 7 – energy of optimized fragment 2 in its basis set. The energies 1-5 are obtained during the Counterpoise=2 calculations for estimation of  $\Delta E_{CP}$  energies and BSSE. Additional two calculations, energies in columns 6 and 7, are performed to estimate the deformation of monomers upon complexation. See Fig. S37 which monomers (in columns 6 and 7) were used in each calculation. The energies of optimised monomers in their basis set are the following:  $[\text{Re}(\text{CO})_3(\text{MeQ})] = -934.672846$  a.u.;  $\text{MeHim} = -265.641630$  a.u.;  $\text{Hdmpz} = -304.957250$  a.u.;  $\text{DMSO} = -553.306004$  au;  $\text{MeO}^- = -516.088725$  a.u.;  $[\text{Re}(\text{CO})_3\text{MeHim}]^+ = -683.965563$  a.u.;  $[\text{Re}(\text{CO})_3\text{Hdmpz}]^+ = -723.280169$  a.u.;  $[\text{Re}(\text{CO})_3\text{DSMO}]^+ = -971.631027$  a.u.

The energies are defined as:  $\Delta E = (1-4-5)$ ;  $\Delta E_{CP} = (1-2-3)$ ;  $\text{BSSE} = (4+5)-(2+3) = \Delta E_{CP} - \Delta E$ ;  $\Delta E_7 = (1-2-3+4+5-6-7)$ ;  $\Delta E_{\text{def}} = (4+5)-(6+7) = \Delta E_7 - \Delta E_{CP}$ . The factor of 627.5095 was used to convert a.u. units into kcal/mol.

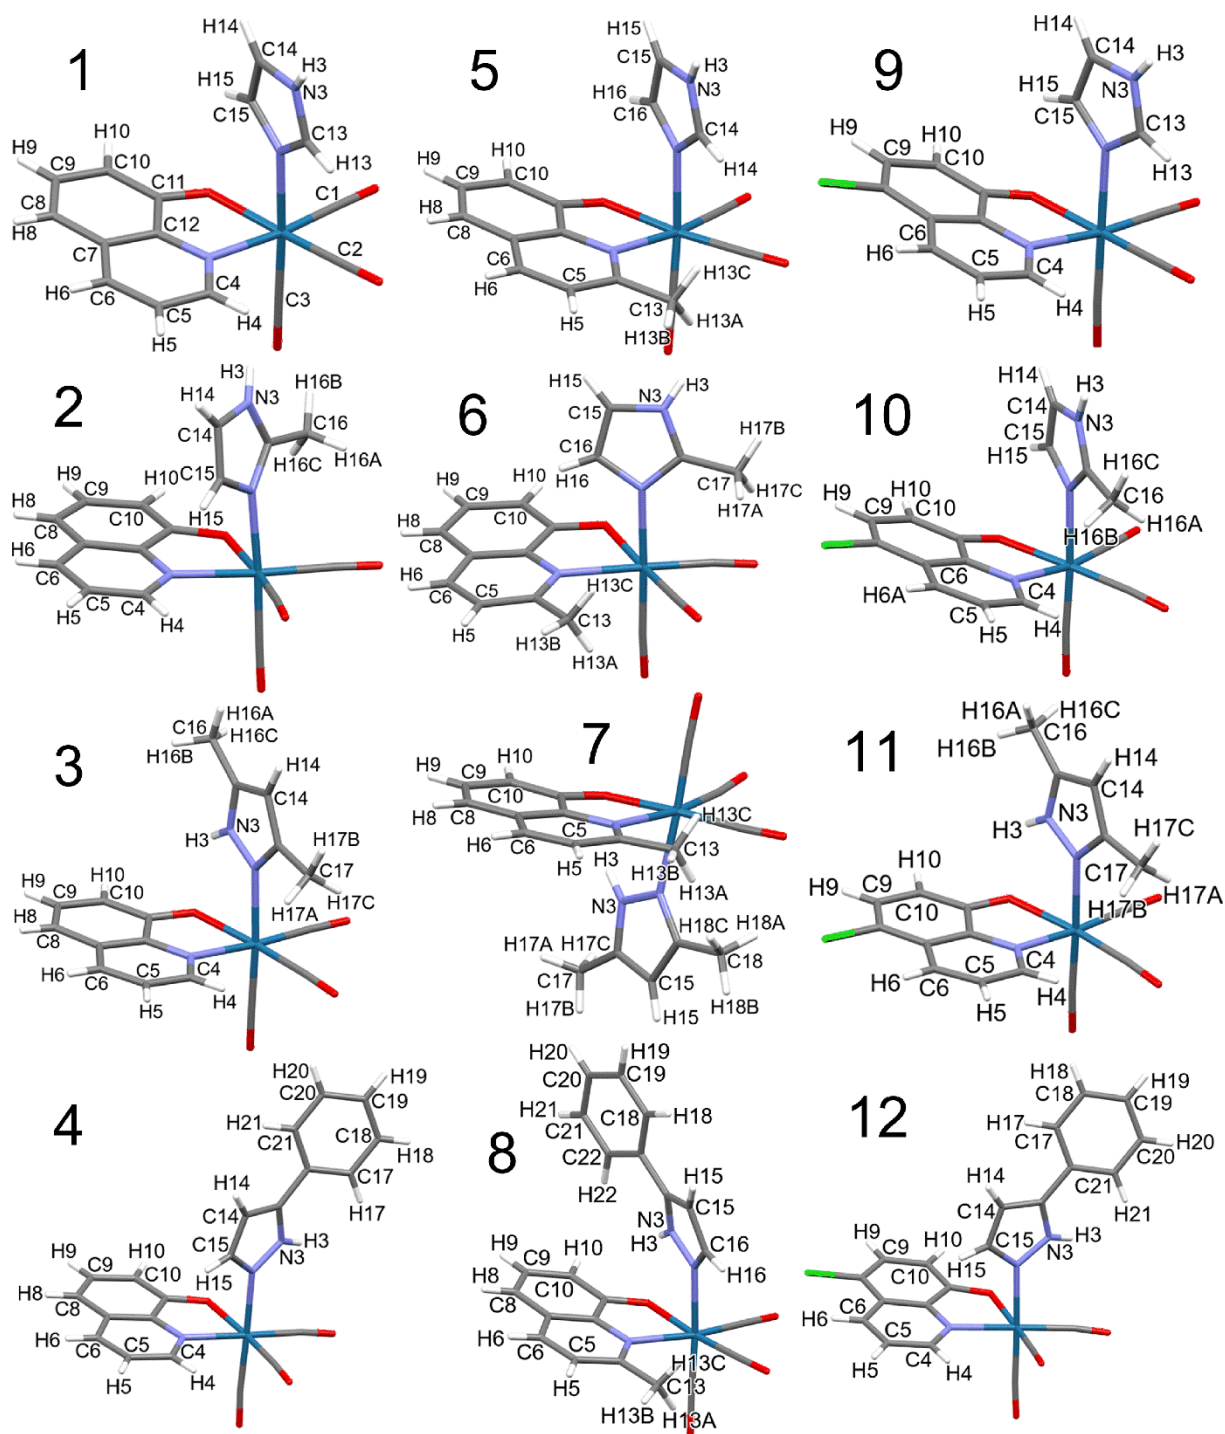

**Figure S38.** Atom labeling in tricarboxyl rhenium(I) complexes for NMR assignment.

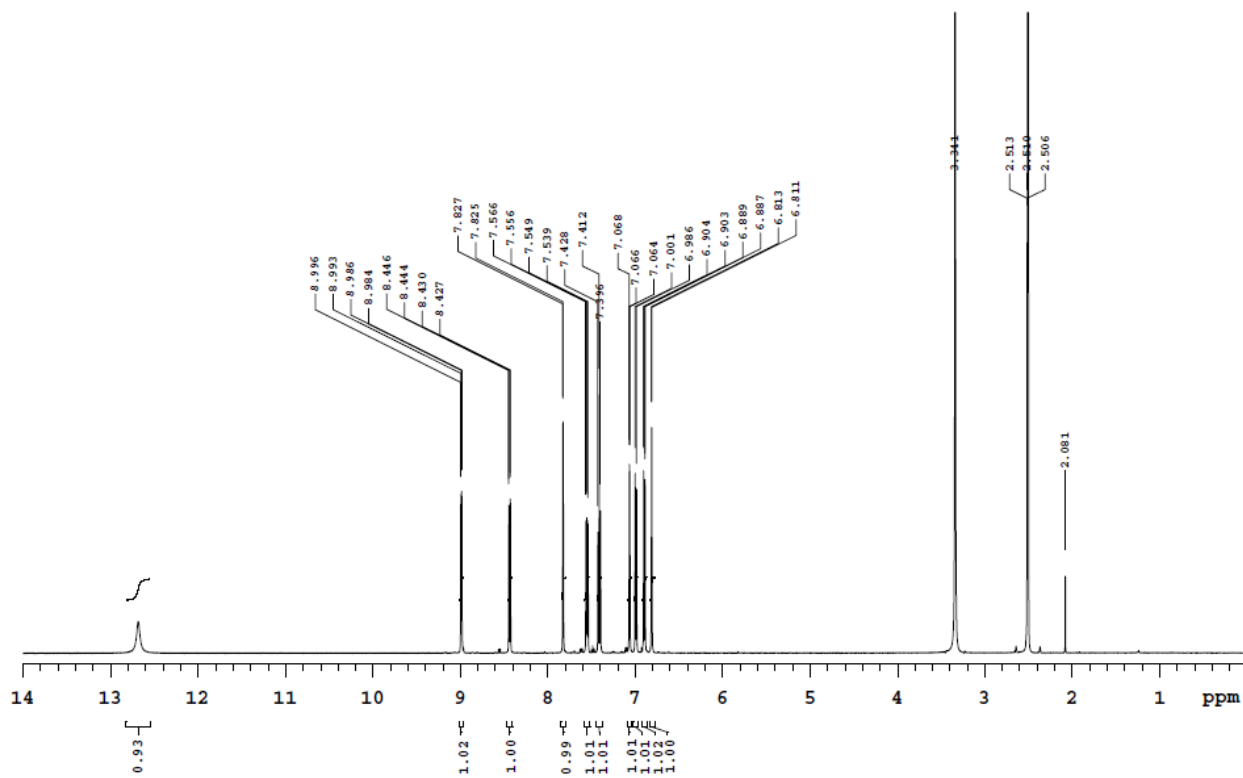

**Fig. S39a.**  $^1\text{H}$  NMR spectrum of  $[\text{Re}(\text{CO})_3(\text{Q})\text{Him}]$  (**1**) in  $\text{DMSO-}d_6$ .

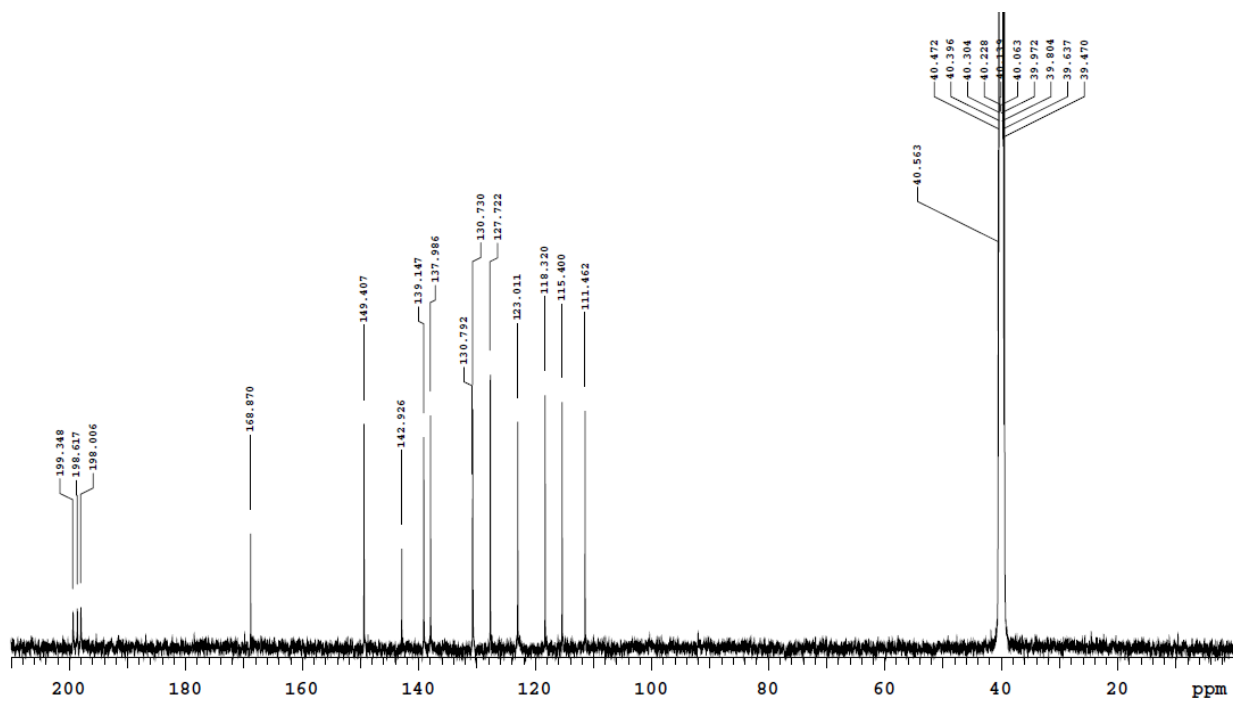

**Fig. S39b.**  $^{13}\text{C}$  NMR spectrum of  $[\text{Re}(\text{CO})_3(\text{Q})\text{Him}]$  (**1**) in  $\text{DMSO-}d_6$ .

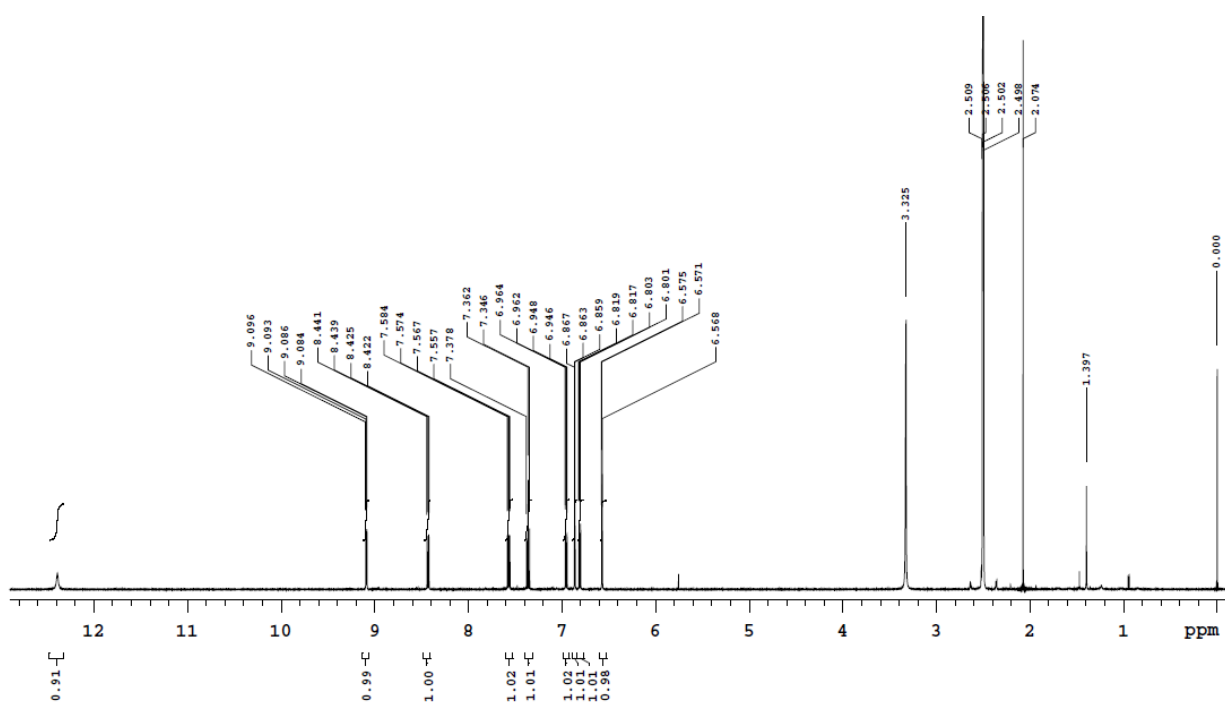

**Fig. S40a.**  $^1\text{H}$  NMR spectrum of  $[\text{Re}(\text{CO})_3(\text{Q})\text{MeHim}]$  (**2**) in  $\text{DMSO-}d_6$ .

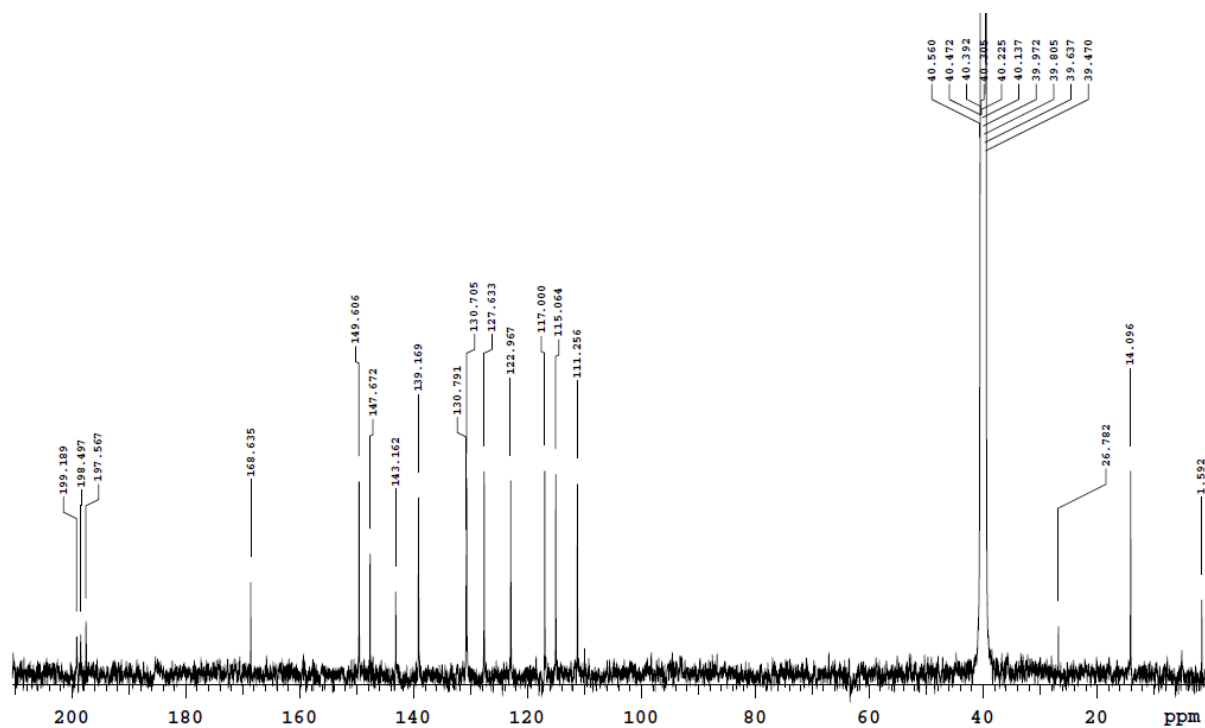

**Fig. S40b.**  $^{13}\text{C}$  NMR spectrum of  $[\text{Re}(\text{CO})_3(\text{Q})\text{MeHim}]$  (**2**) in  $\text{DMSO-}d_6$ .

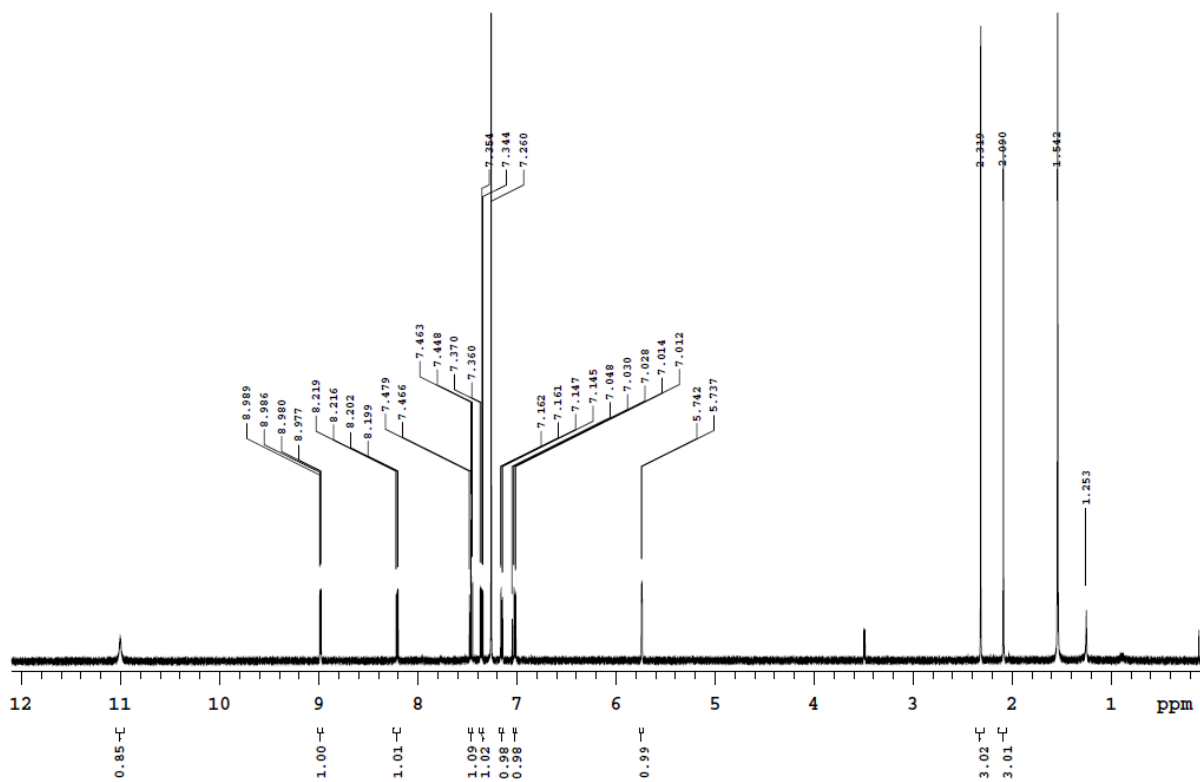

Fig. S41a.  $^1\text{H}$  NMR spectrum of  $[\text{Re}(\text{CO})_3(\text{Q})\text{Hdmpz}]$  (**3**) in  $\text{CDCl}_3$ .

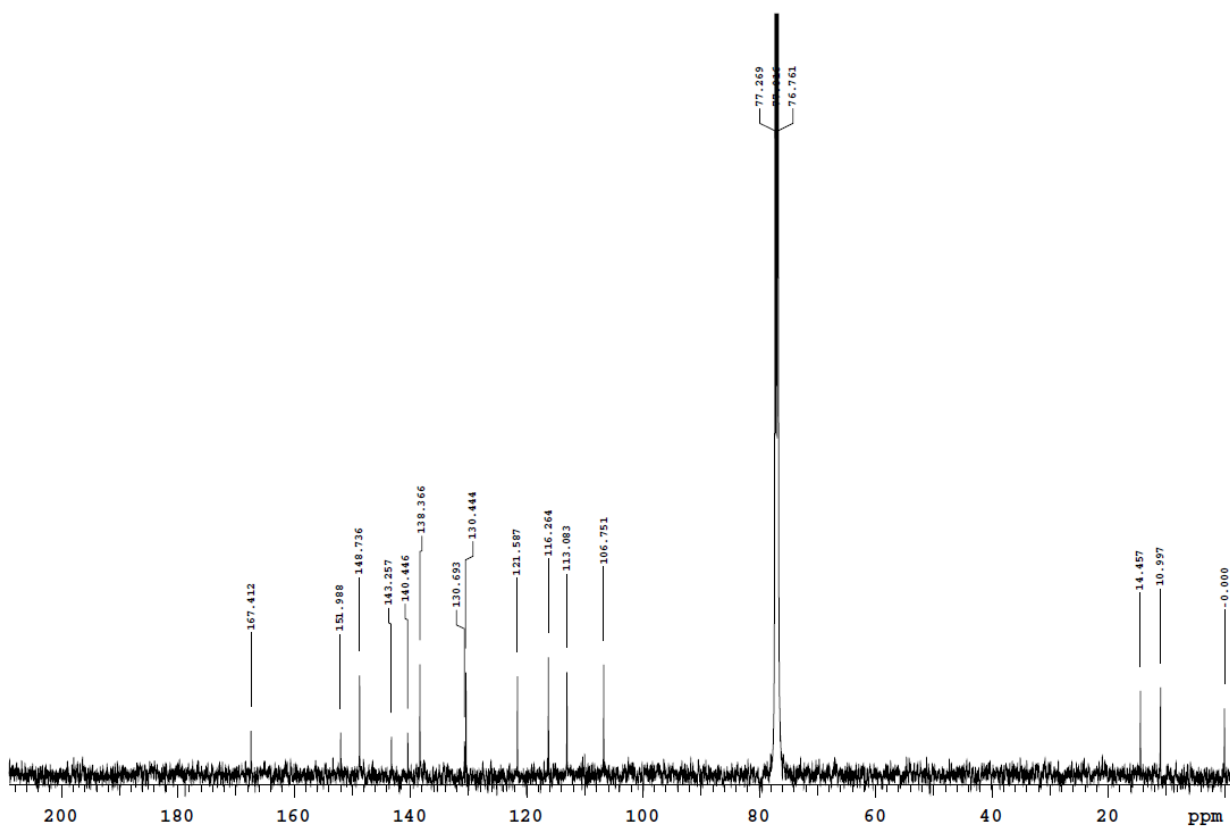

Fig. S41b.  $^{13}\text{C}$  NMR spectrum of  $[\text{Re}(\text{CO})_3(\text{Q})\text{Hdmpz}]$  (**3**) in  $\text{CDCl}_3$ .

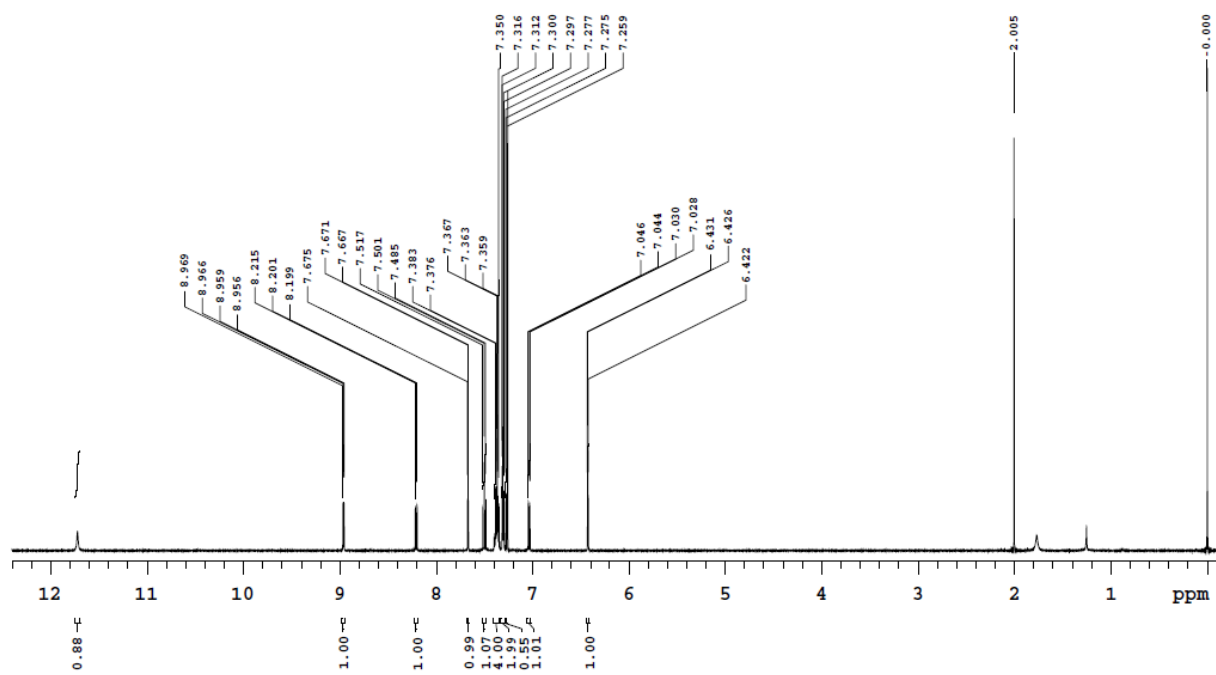

Fig. S42a.  $^1\text{H}$  NMR spectrum of  $[\text{Re}(\text{CO})_3(\text{Q})\text{HPhpz}]$  (**4**) in  $\text{CDCl}_3$ .

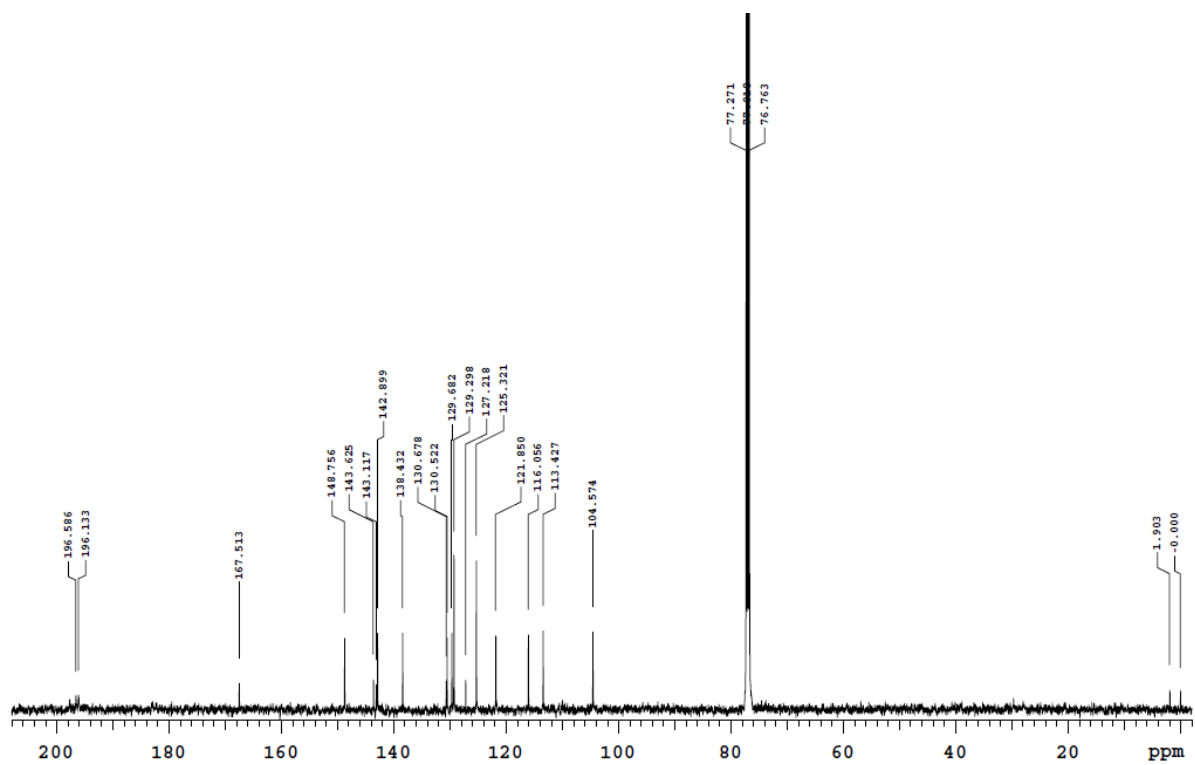

Fig. S42b.  $^{13}\text{C}$  NMR spectrum of  $[\text{Re}(\text{CO})_3(\text{Q})\text{HPhpz}]$  (**4**) in  $\text{CDCl}_3$ .

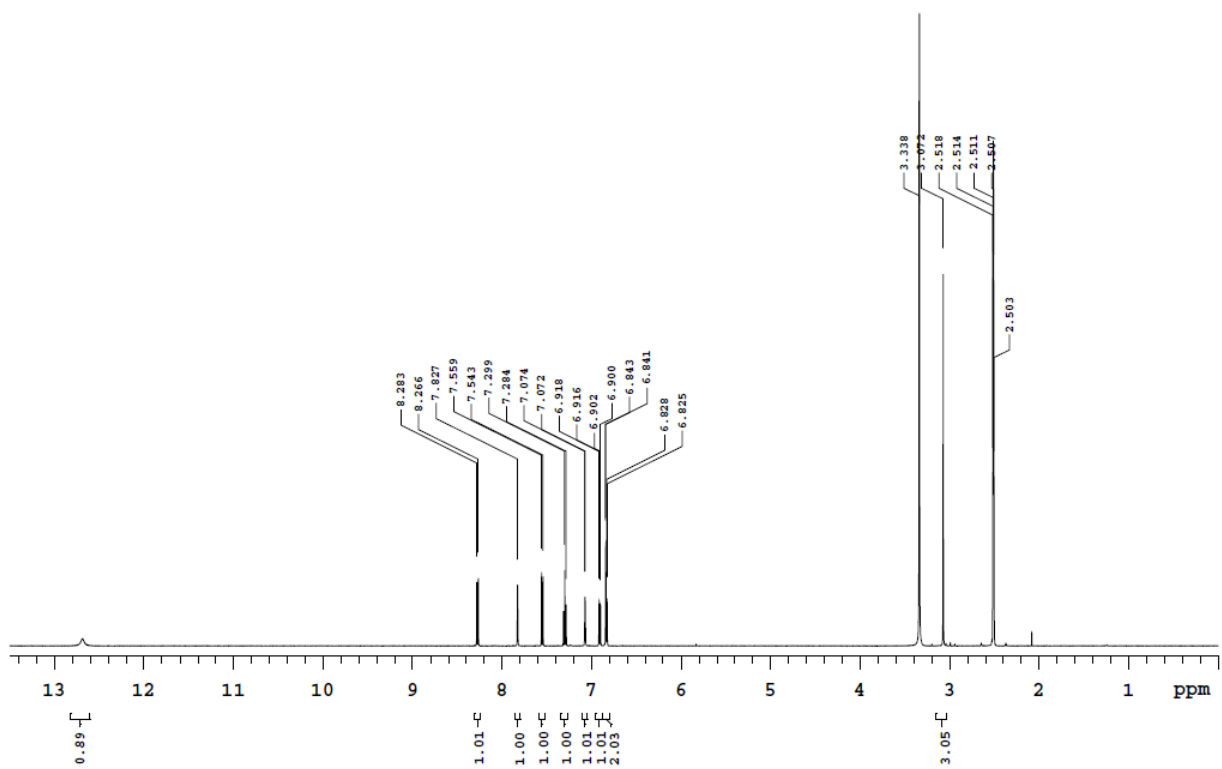

Fig. S43a.  $^1\text{H}$  NMR spectrum of  $[\text{Re}(\text{CO})_3(\text{MeQ})\text{Him}]$  (**5**) in  $\text{DMSO-}d_6$ .

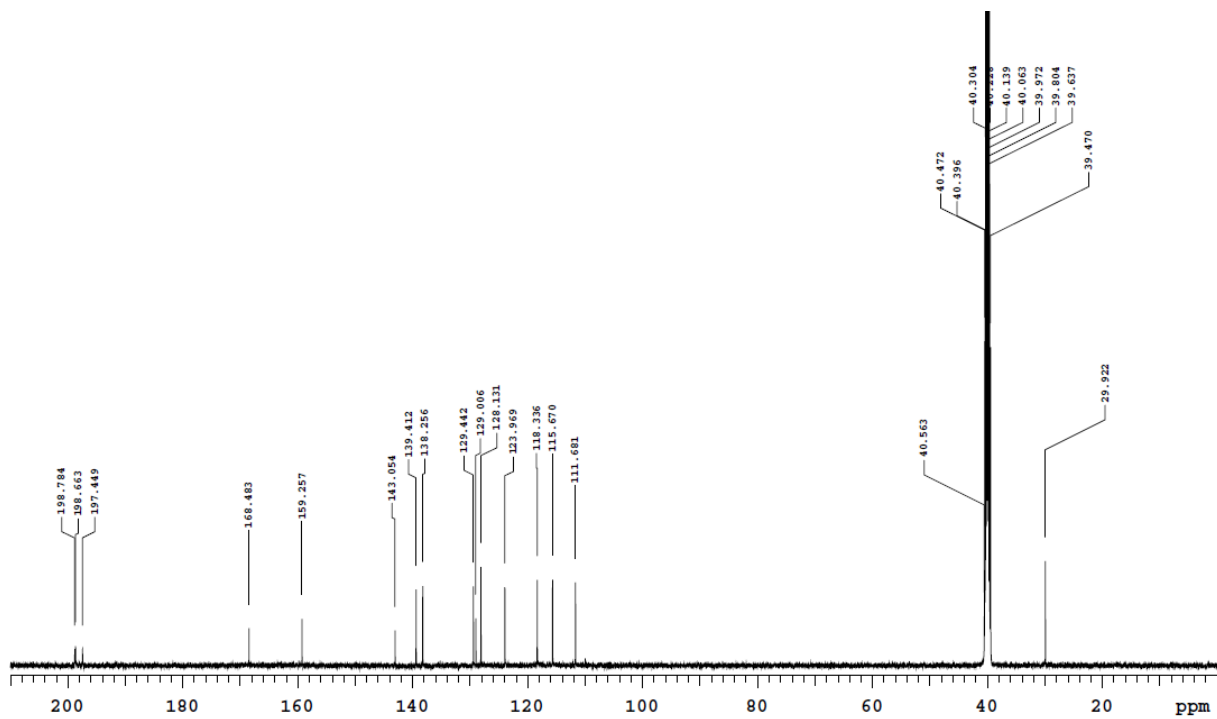

Fig. S43b.  $^{13}\text{C}$  NMR spectrum of  $[\text{Re}(\text{CO})_3(\text{MeQ})\text{Him}]$  (**5**) in  $\text{DMSO-}d_6$ .



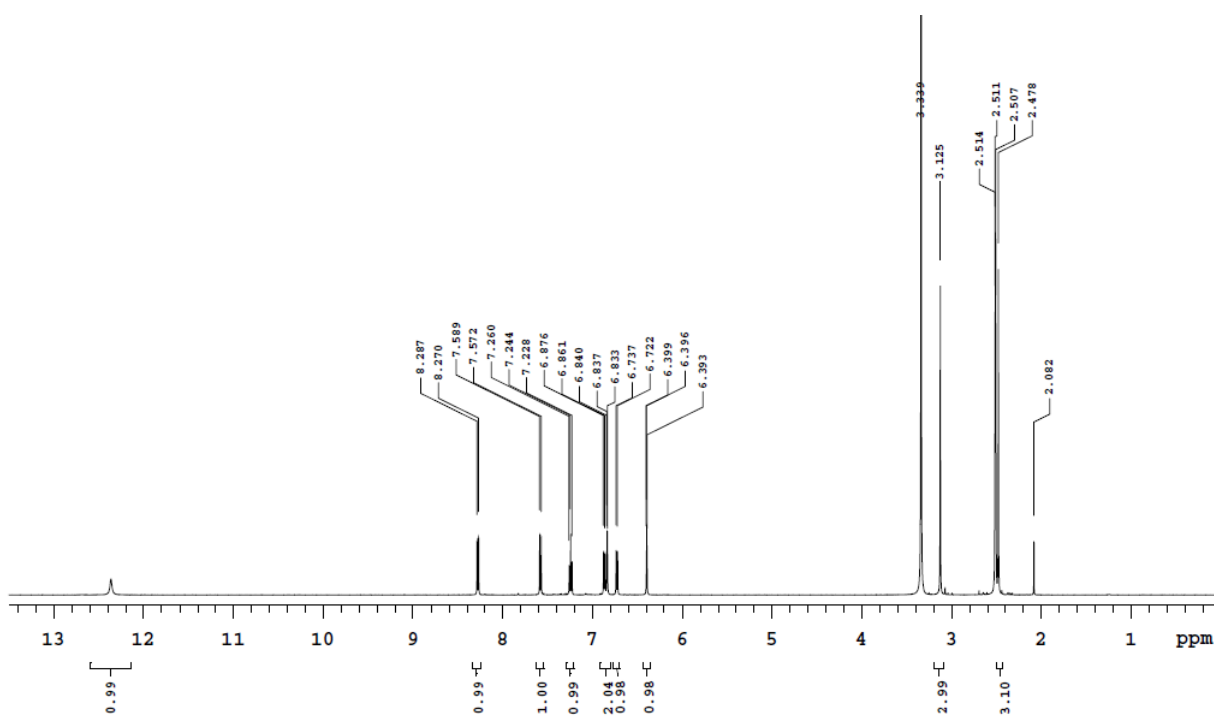

**Fig. S44a.**  $^1\text{H}$  NMR spectrum of  $[\text{Re}(\text{CO})_3(\text{MeQ})\text{MeHim}]$  (**6**) in  $\text{DMSO-}d_6$ .

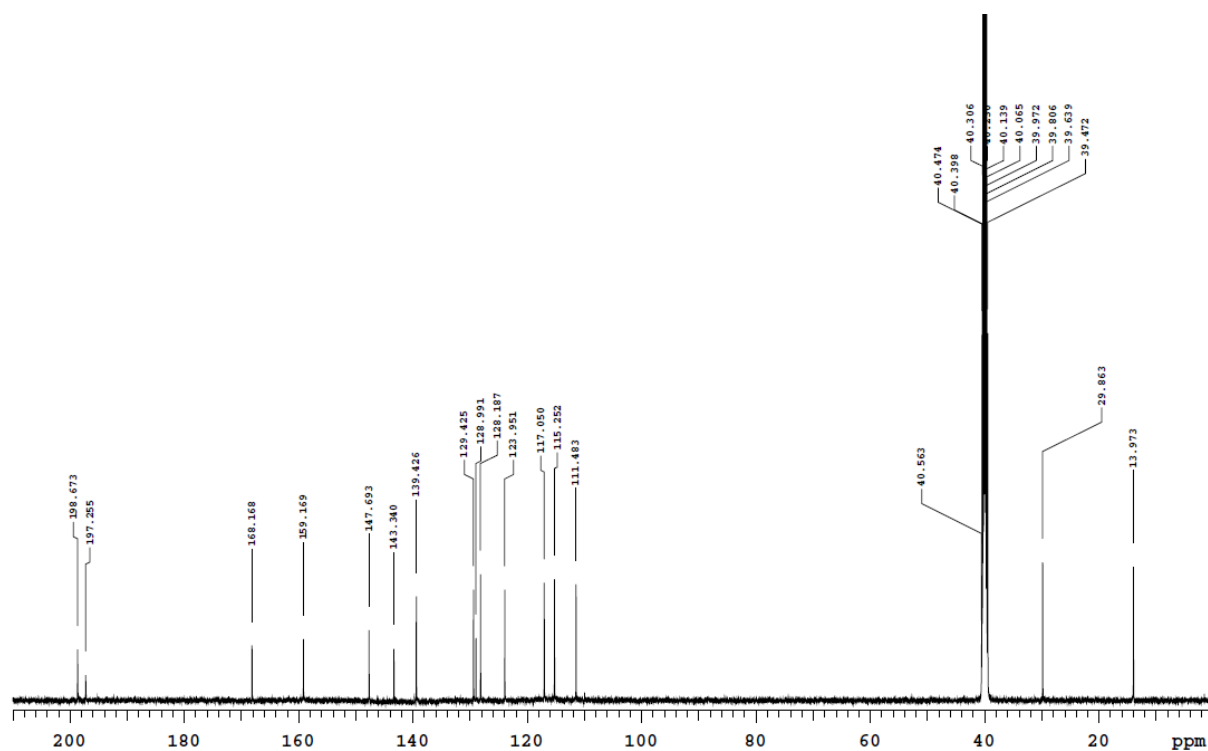

**Fig. S44b.**  $^{13}\text{C}$  NMR spectrum of  $[\text{Re}(\text{CO})_3(\text{MeQ})\text{MeHim}]$  (**6**) in  $\text{DMSO-}d_6$ .

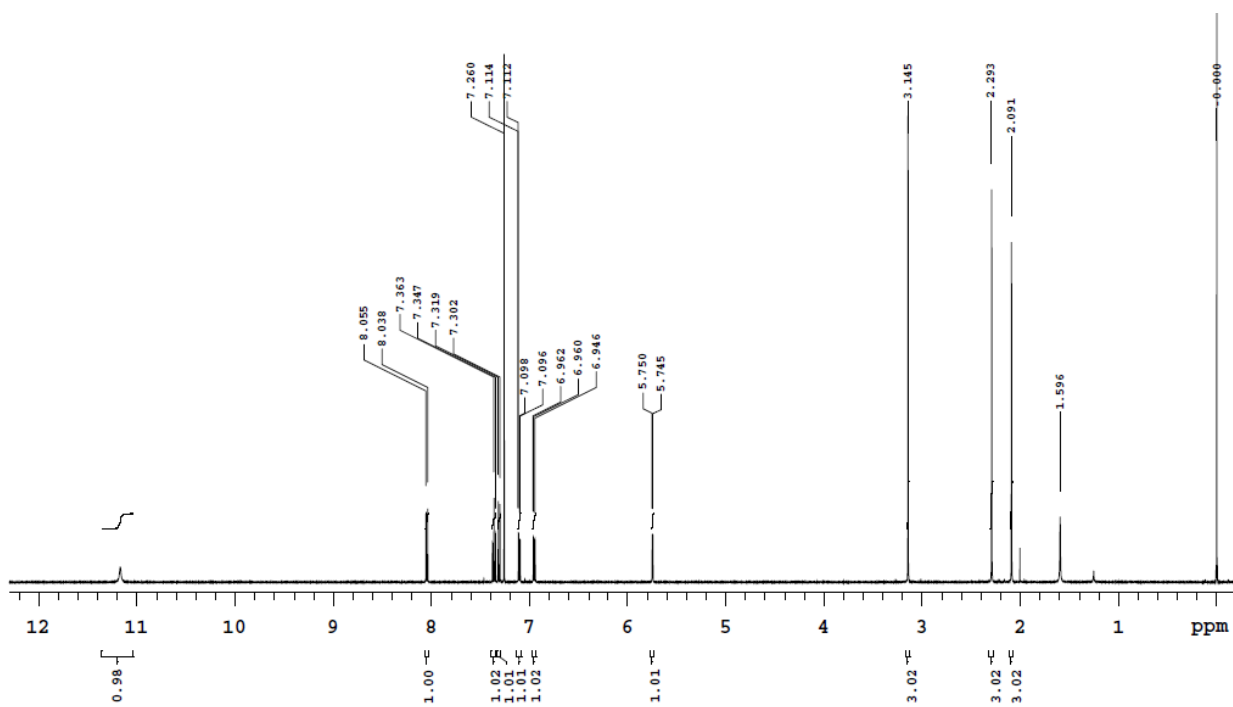

**Fig. S45a.**  $^1\text{H}$  NMR spectrum of  $[\text{Re}(\text{CO})_3(\text{MeQ})\text{Hdmpz}]$  (**7**) in  $\text{CDCl}_3$ .

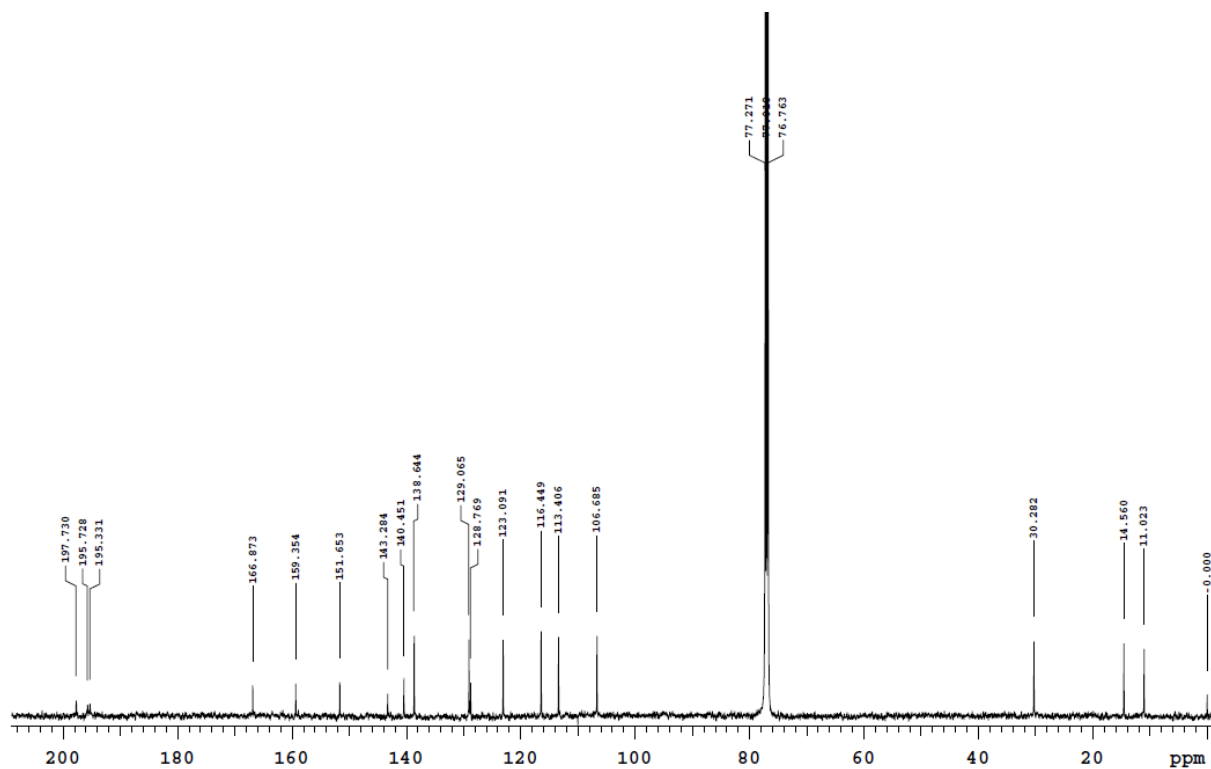

**Fig. S45b.**  $^{13}\text{C}$  NMR spectrum of  $[\text{Re}(\text{CO})_3(\text{MeQ})\text{Hdmpz}]$  (**7**) in  $\text{CDCl}_3$ .

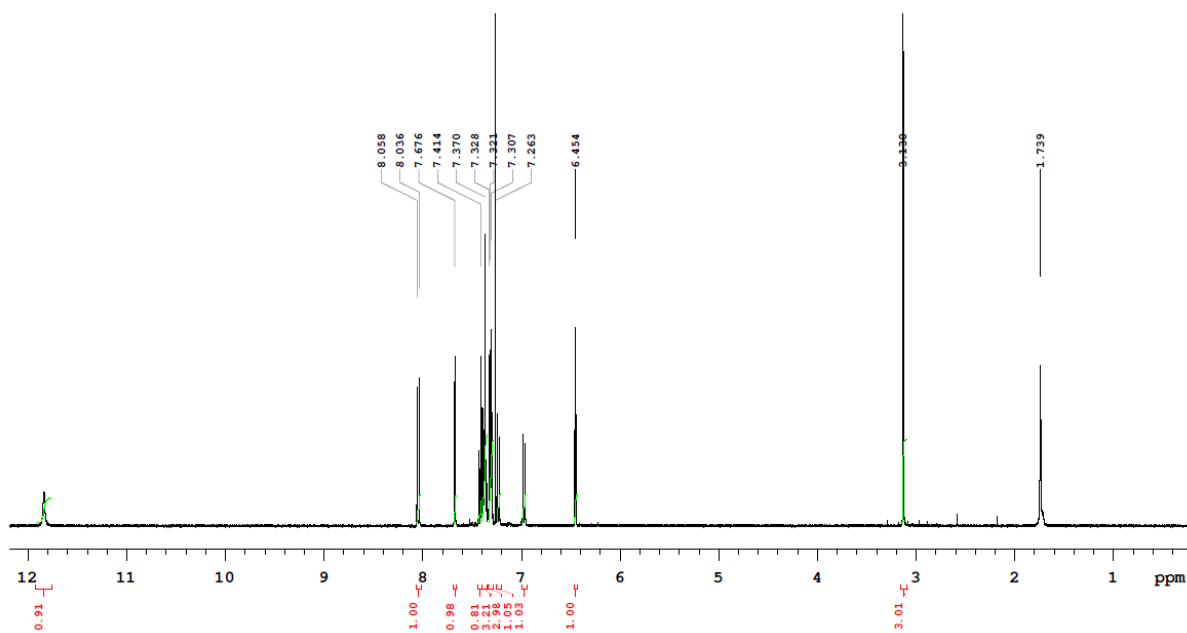

**Fig. S46a.**  $^1\text{H}$  NMR spectrum of  $[\text{Re}(\text{CO})_3(\text{MeQ})\text{HPhpz}]$  (**8**) in  $\text{CDCl}_3$ .

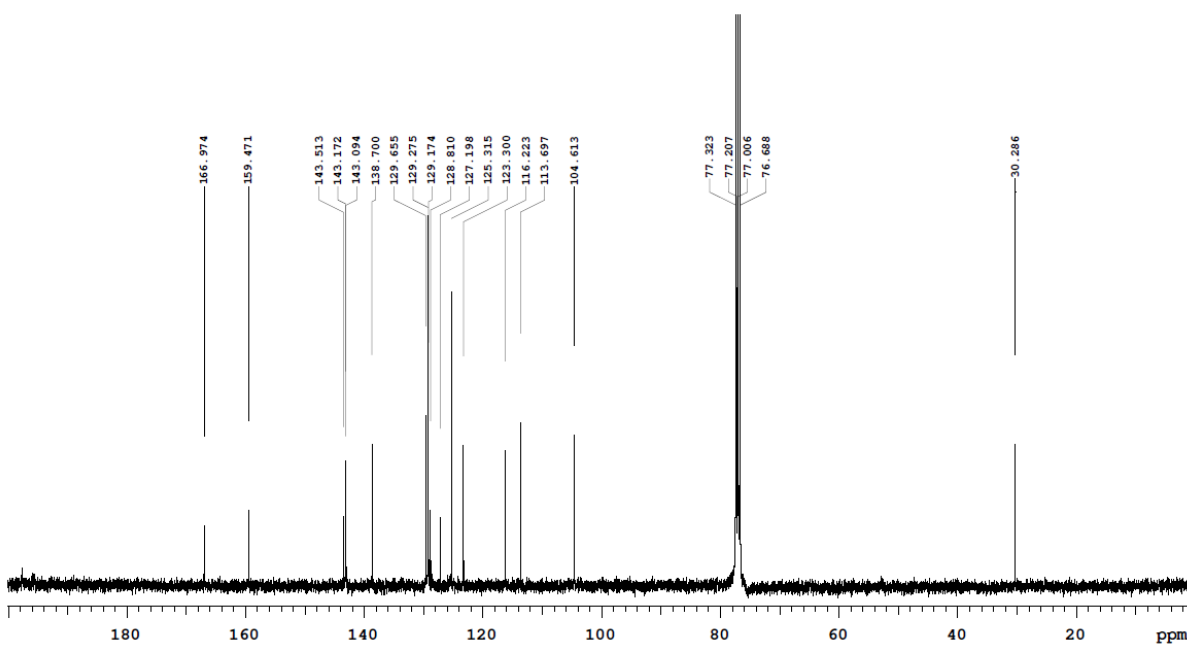

**Fig. S46b.**  $^{13}\text{C}$  NMR spectrum of  $[\text{Re}(\text{CO})_3(\text{MeQ})\text{HPhpz}]$  (**8**) in  $\text{CDCl}_3$ .

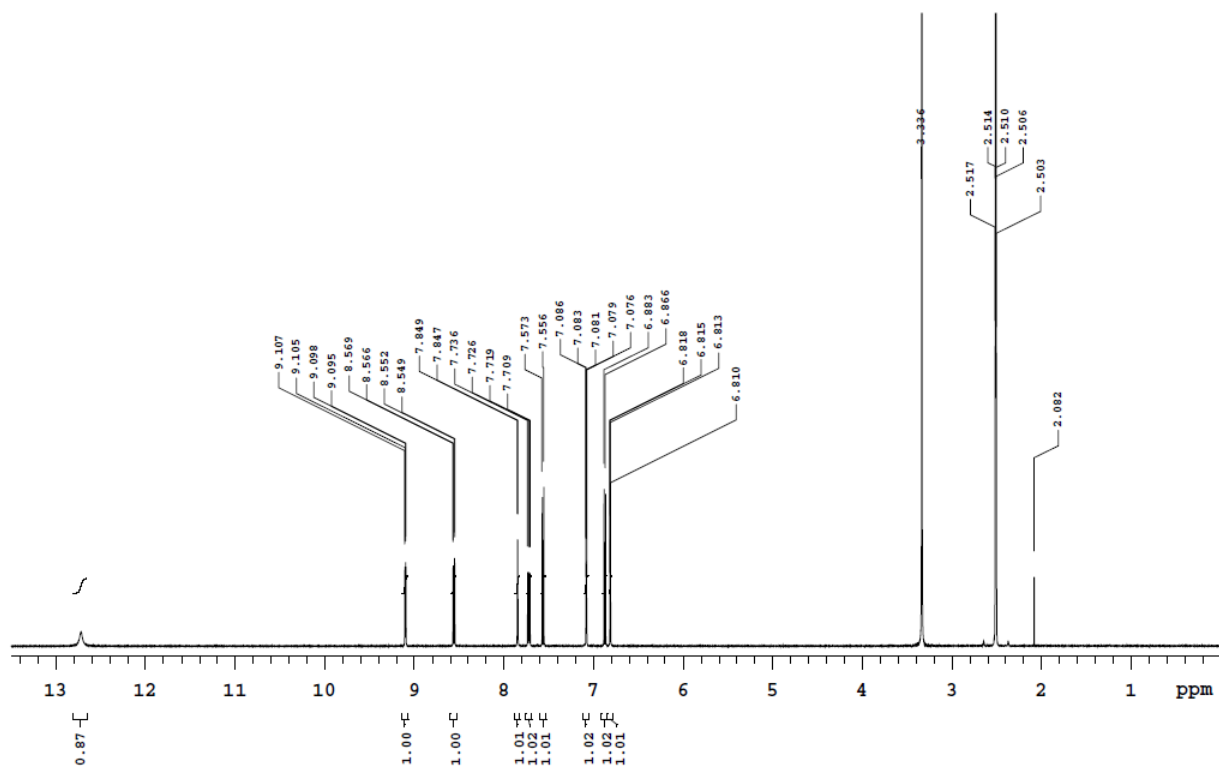

Fig. S47a.  $^1\text{H}$  NMR spectrum of  $[\text{Re}(\text{CO})_3(\text{CIQ})\text{Him}]$  (**9**) in  $\text{DMSO-}d_6$ .

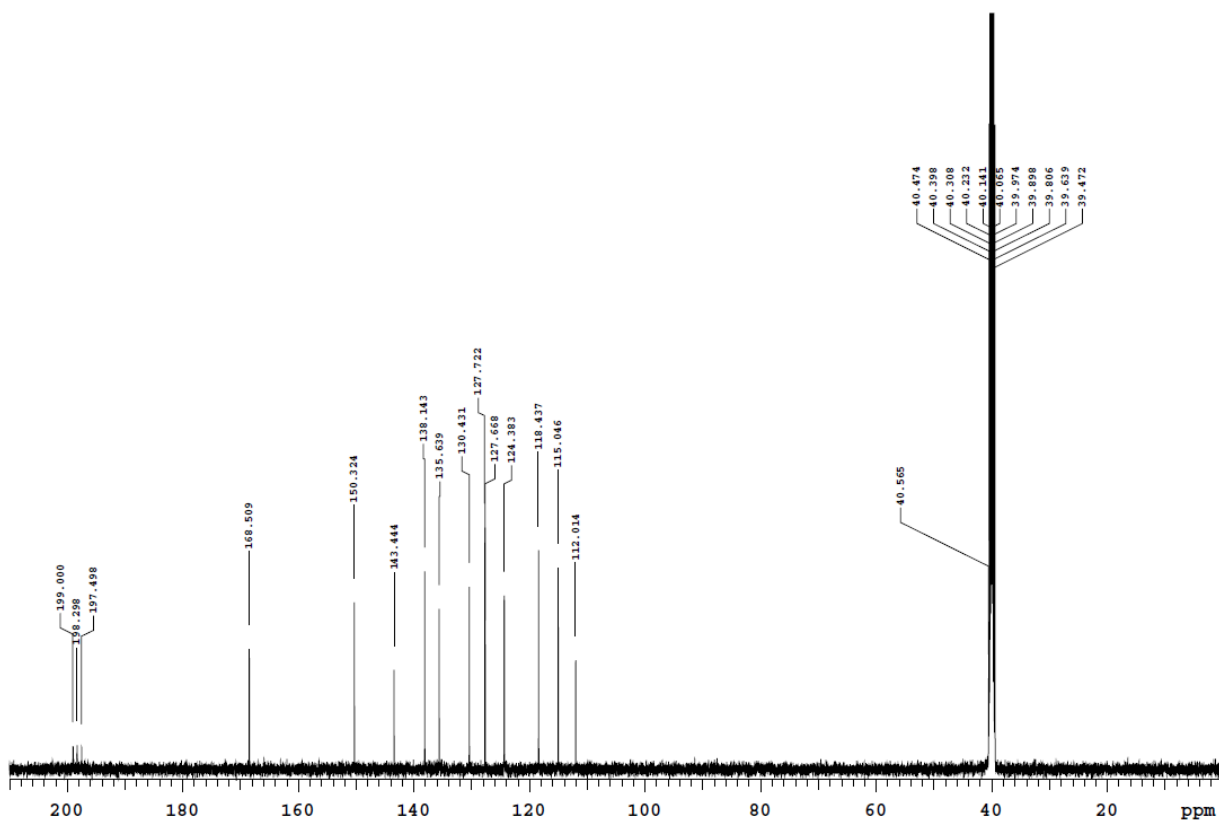

Fig. S47b.  $^{13}\text{C}$  NMR spectrum of  $[\text{Re}(\text{CO})_3(\text{CIQ})\text{Him}]$  (**9**) in  $\text{DMSO-}d_6$ .

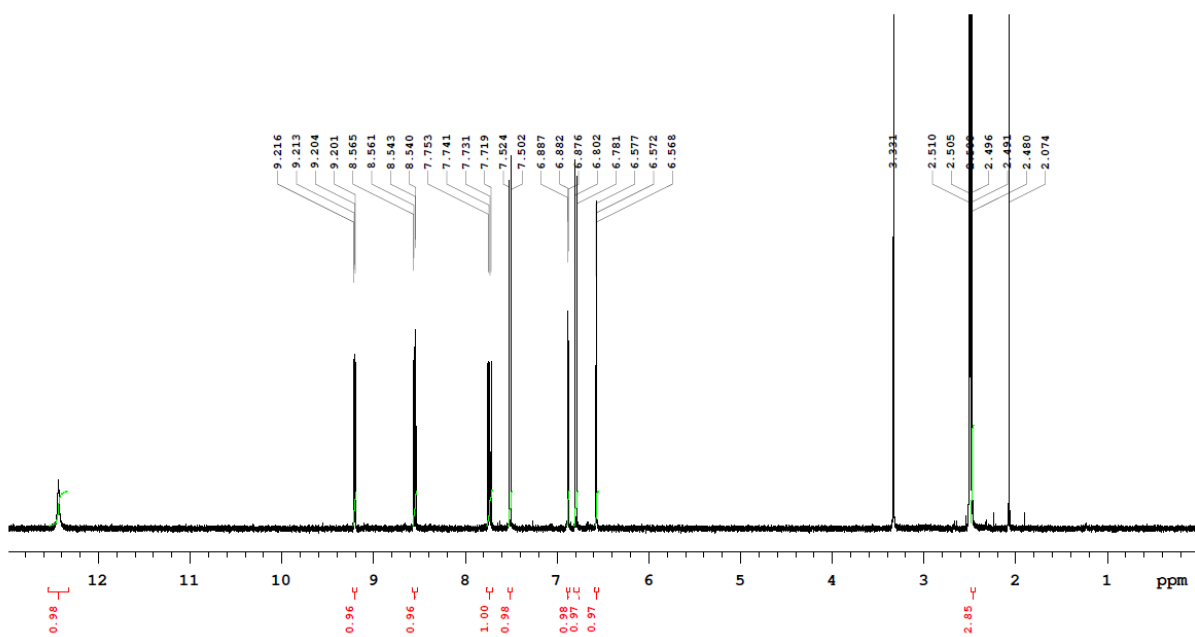

Fig. S48a.  $^1\text{H}$  NMR spectrum of  $[\text{Re}(\text{CO})_3(\text{CIQ})\text{MeHim}]$  (**10**) in  $\text{DMSO-}d_6$ .

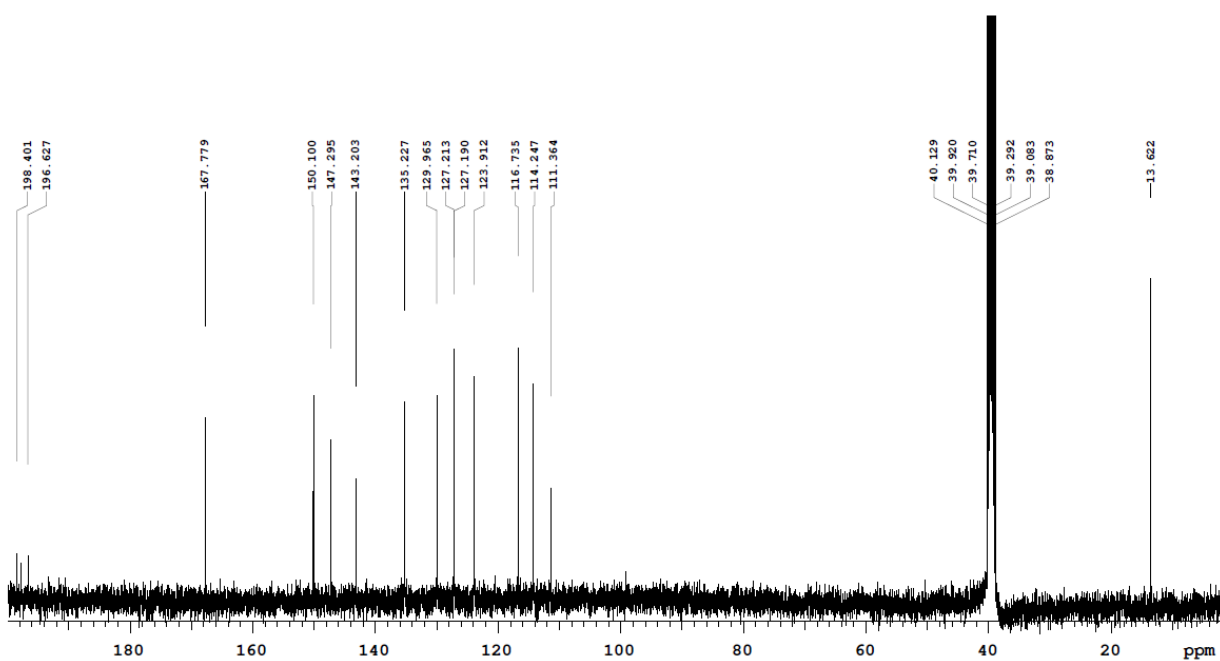

Fig. S48b.  $^{13}\text{C}$  NMR spectrum of  $[\text{Re}(\text{CO})_3(\text{CIQ})\text{MeHim}]$  (**10**) in  $\text{DMSO-}d_6$ .

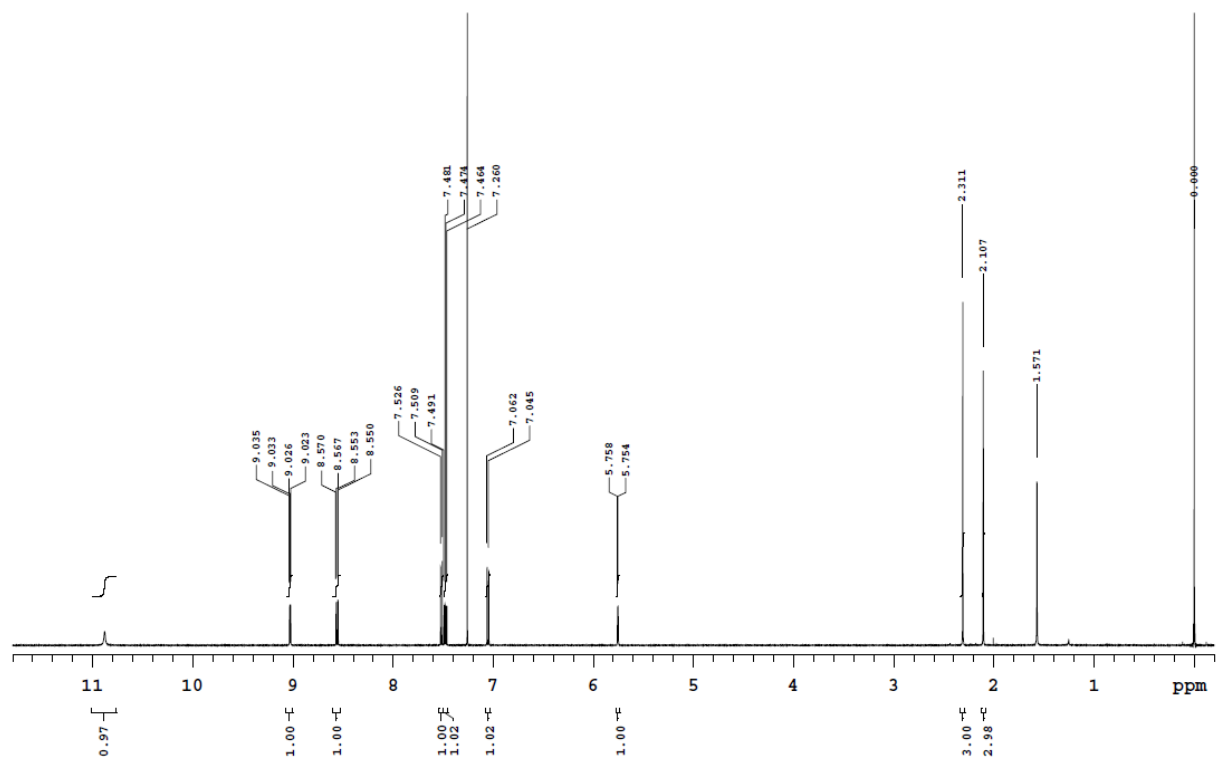

Fig. S49a.  $^1\text{H}$  NMR spectrum of  $[\text{Re}(\text{CO})_3(\text{Cl})\text{Q}]\text{Hdmpz}$  (**11**) in  $\text{CDCl}_3$ .

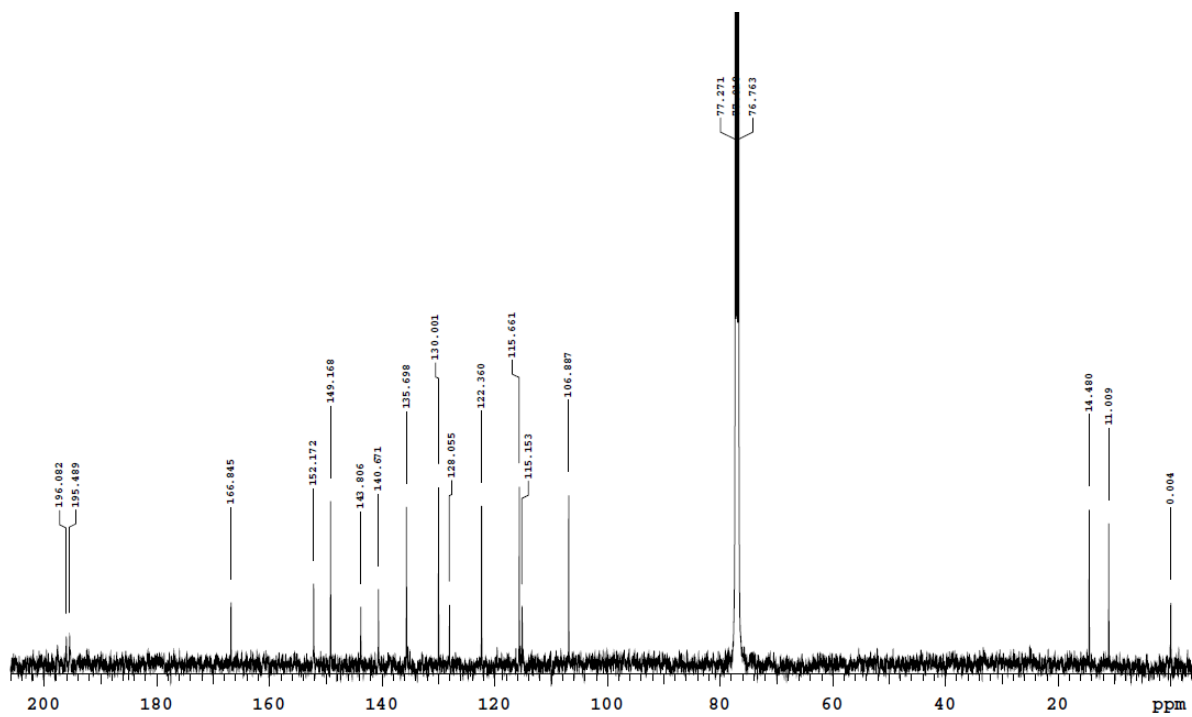

Fig. S49b.  $^{13}\text{C}$  NMR spectrum of  $[\text{Re}(\text{CO})_3(\text{Cl})\text{Q}]\text{Hdmpz}$  (**11**) in  $\text{CDCl}_3$ .

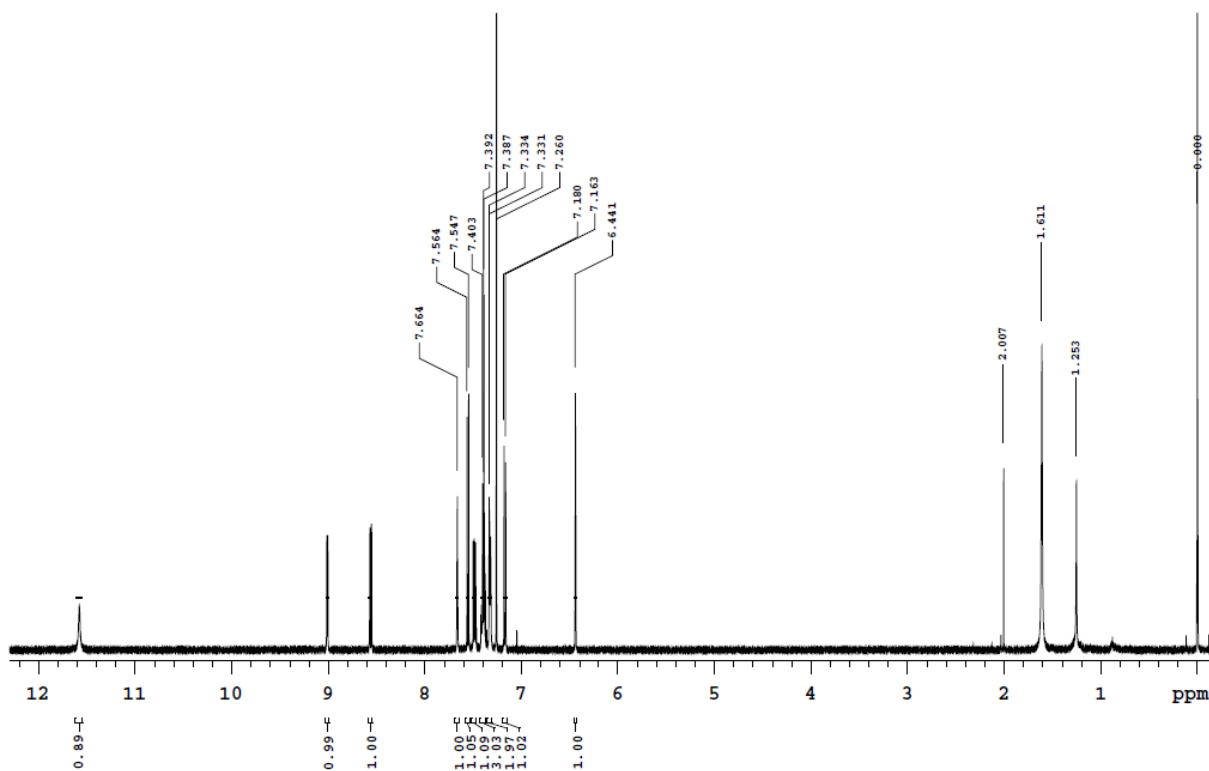

**Fig. S50a.**  $^1\text{H}$  NMR spectrum of  $[\text{Re}(\text{CO})_3(\text{CIQ})\text{HPhpz}]$  (**12**) in  $\text{CDCl}_3$ .

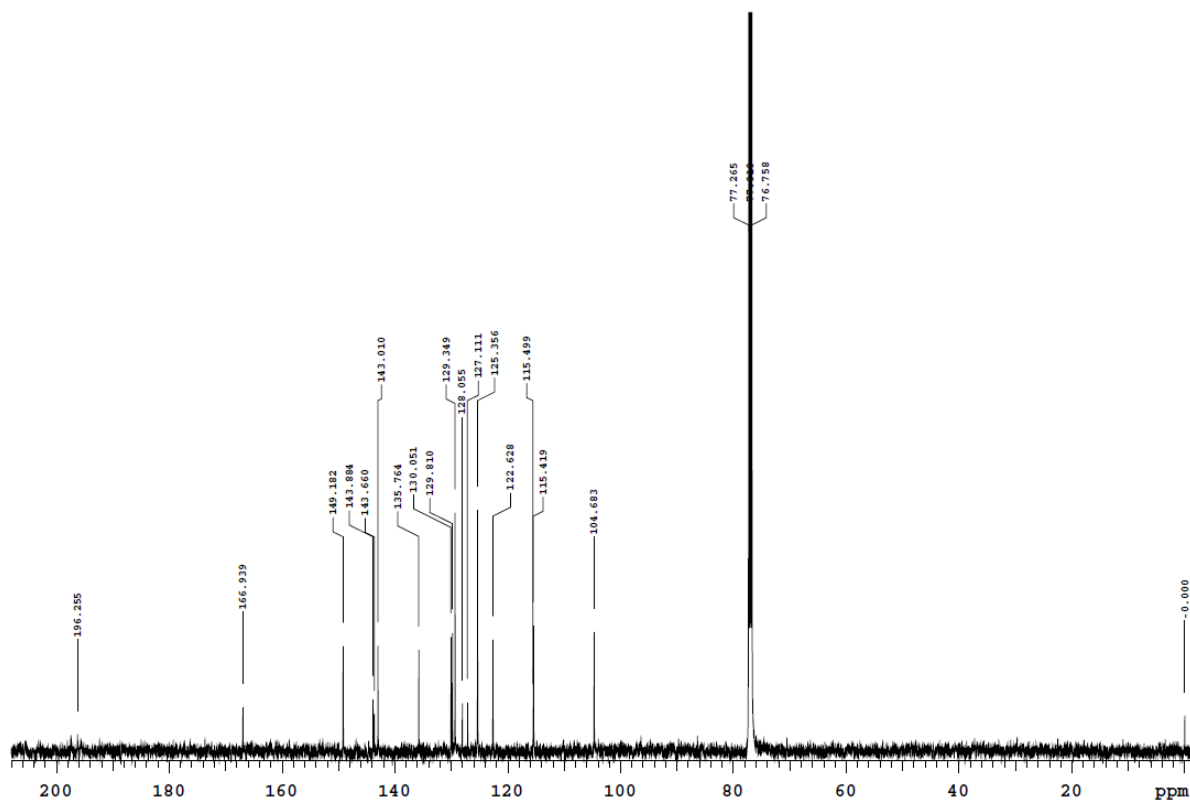

**Fig. S50b.**  $^{13}\text{C}$  NMR spectrum of  $[\text{Re}(\text{CO})_3(\text{CIQ})\text{HPhpz}]$  (**12**) in  $\text{CDCl}_3$ .
